# Supplementary material for: Genetic characterization of the ALFA study: Uncovering genetic profiles in the Alzheimer's continuum
Source: PubMed Central journal article supplement — Alzheimers Dement. 2023 Dec 13;20(3):1703–15. doi: 10.1002/alz.13537 (PMC10984507; doi:10.1002/alz.13537), 2023-12-13
Supplement: ALZ-20-1703-s001.pdf [file ALZ-20-1703-s001.pdf]

# alfa study

ALZHEIMER FAMILIES

1 Collect blood samples from ALFA study participants (N = 2,640)

2 Genome-wide genotyping (Neurochip Illumina)

3 Data acquisition (N = 2,527)

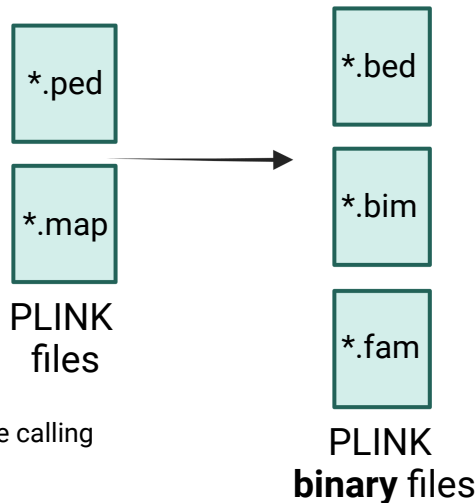

\*.bed  
Contains binary version of the SNP info of the \*.ped file

\*.bim

| Chr | SNP | BP     | A1 | A2 |
|-----|-----|--------|----|----|
| 1   | rs1 | 870000 | C  | T  |
| 1   | rs2 | 880000 | A  | G  |
| ... |     |        |    |    |

\*.fam

| FID | IID | PID | MID | Sex | P |
|-----|-----|-----|-----|-----|---|
| 1   | 1   | 0   | 0   | 1   | 1 |
| 2   | 2   | 0   | 0   | 2   | 0 |
| ... |     |     |     |     |   |

including Manual genotype calling

5 Genetic Imputation Analysis

Michigan Imputation Server

Free Next-Generation Genotype Imputation Service

HRC r.1.1 Panel - European Population

post-Imputation QC

Data available in \*.vcf format  
\*.vcf.dose.gz  
\*.vcf.info.gz

Data available in PLINK binary format  
\*.bim \*.bed \*.fam

\*.bed (qc)

Contains binary version of the SNP info of the \*.ped file

\*.bim (qc)

| Chr | SNP | BP     | A1 | A2 |
|-----|-----|--------|----|----|
| 1   | rs1 | 870000 | C  | T  |
| 1   | rs2 | 880000 | A  | G  |
| ... |     |        |    |    |

\*.fam (qc)

| FID | IID | PID | MID | Sex | P |
|-----|-----|-----|-----|-----|---|
| 1   | 1   | 0   | 0   | 1   | 1 |
| 2   | 2   | 0   | 0   | 2   | 0 |
| ... |     |     |     |     |   |

updated PLINK binary files after QC

4 Quality Control (QC)

Sample (Individuals):

- Rate of Missingness
- Sex Discordance
- Heterozygosity
- Ancestry
- Causal Mutations

Genetic Variants:

- Rate of Missingness
- Hardy Weinberg
- Minor Allele Frequency
- Monomorphic variants

Supplementary Figure S1. Pipeline of genetic data processing.
