# Supplementary material for: Genetic characterization of the ALFA study: Uncovering genetic profiles in the Alzheimer's continuum
Source: PubMed Central journal article supplement — Alzheimers Dement. 2023 Dec 13;20(3):1703–15. doi: 10.1002/alz.13537 (PMC10984507; doi:10.1002/alz.13537), 2023-12-13
Supplement: ALZ-20-1703-s014.pdf [file ALZ-20-1703-s014.pdf]

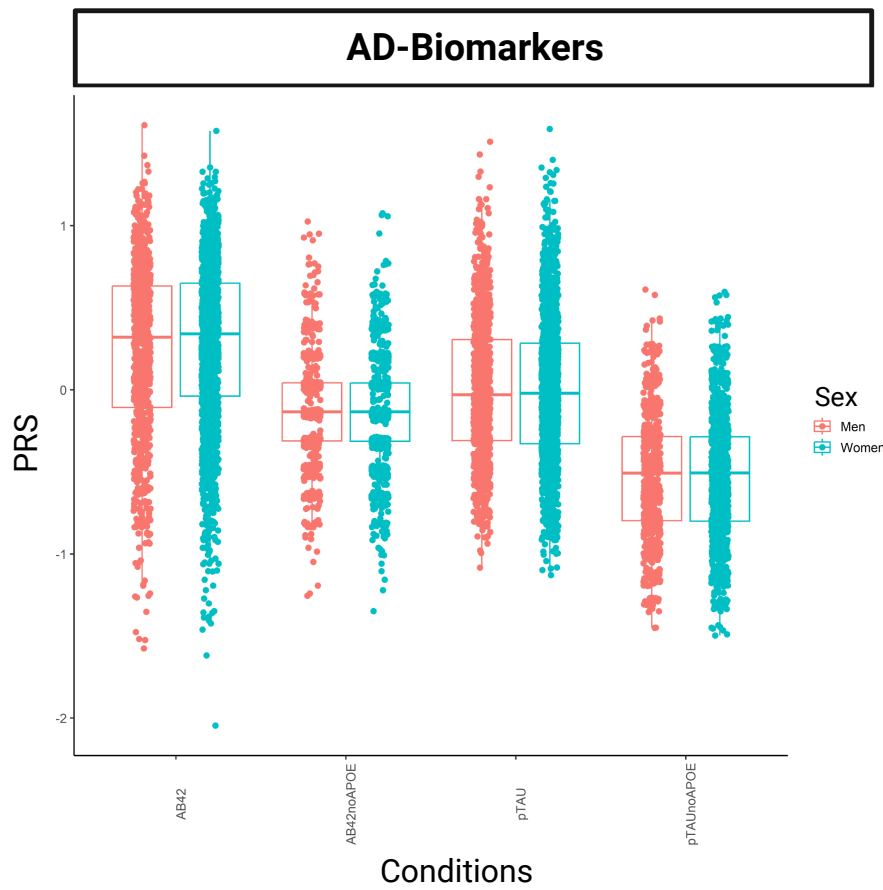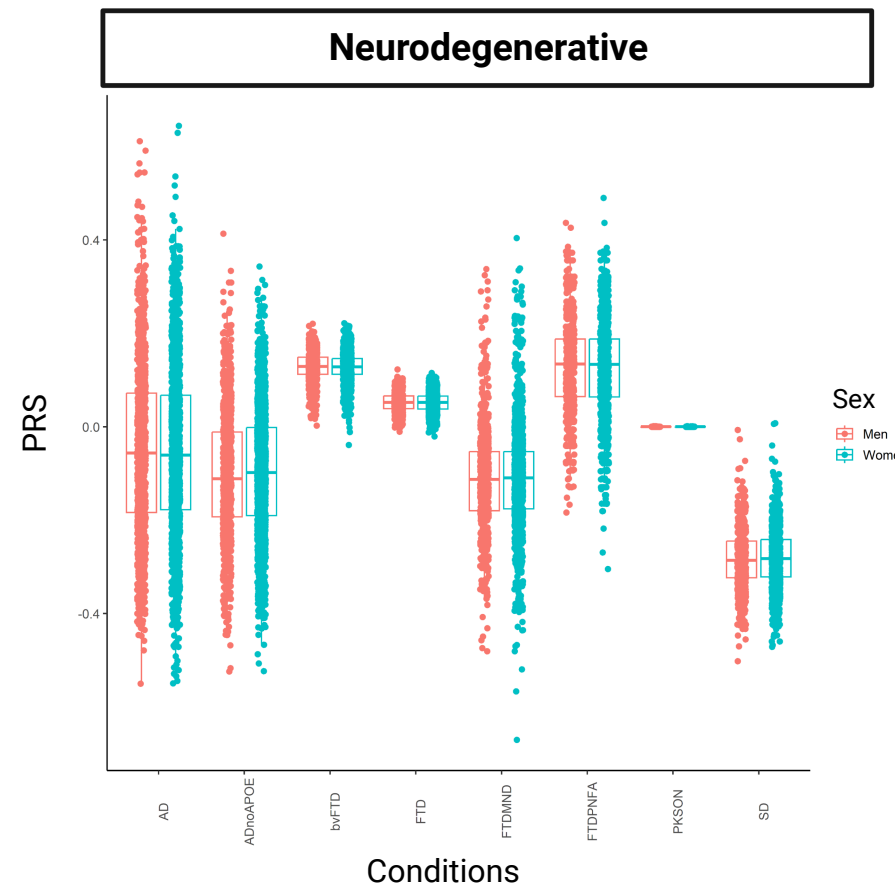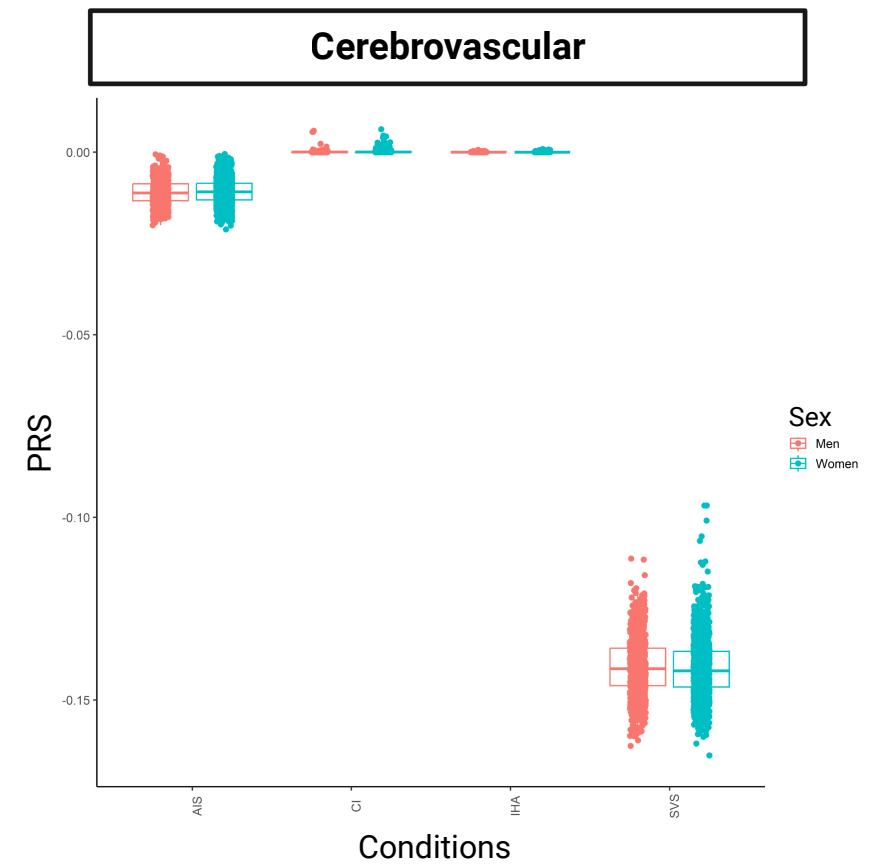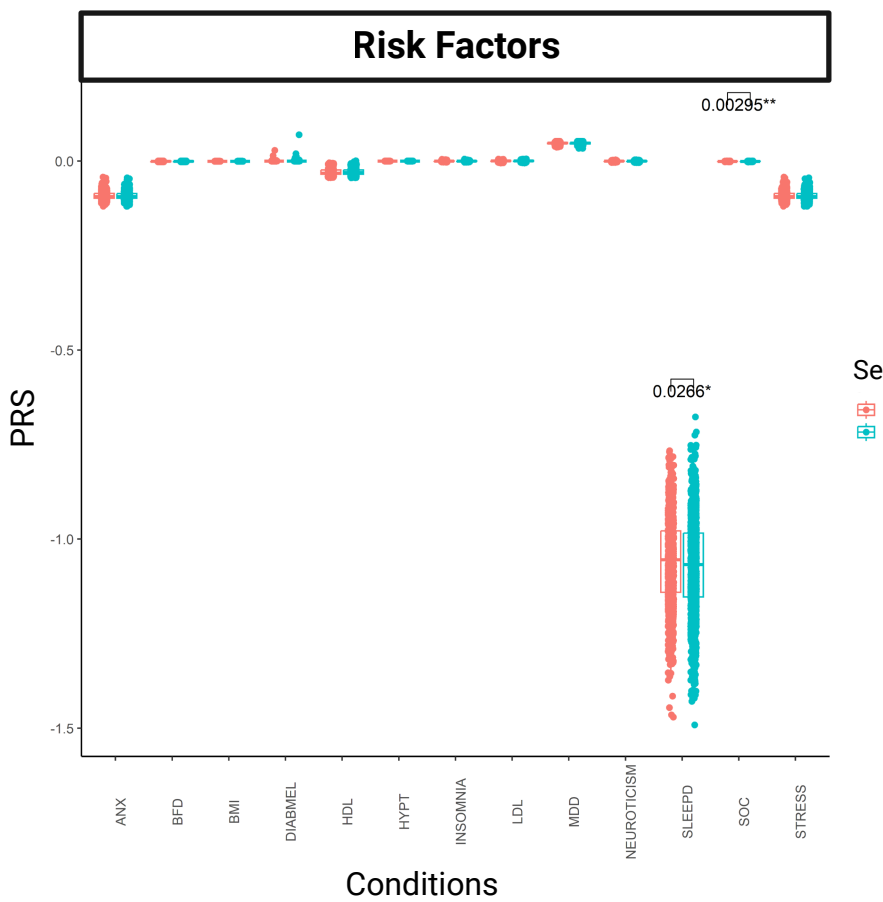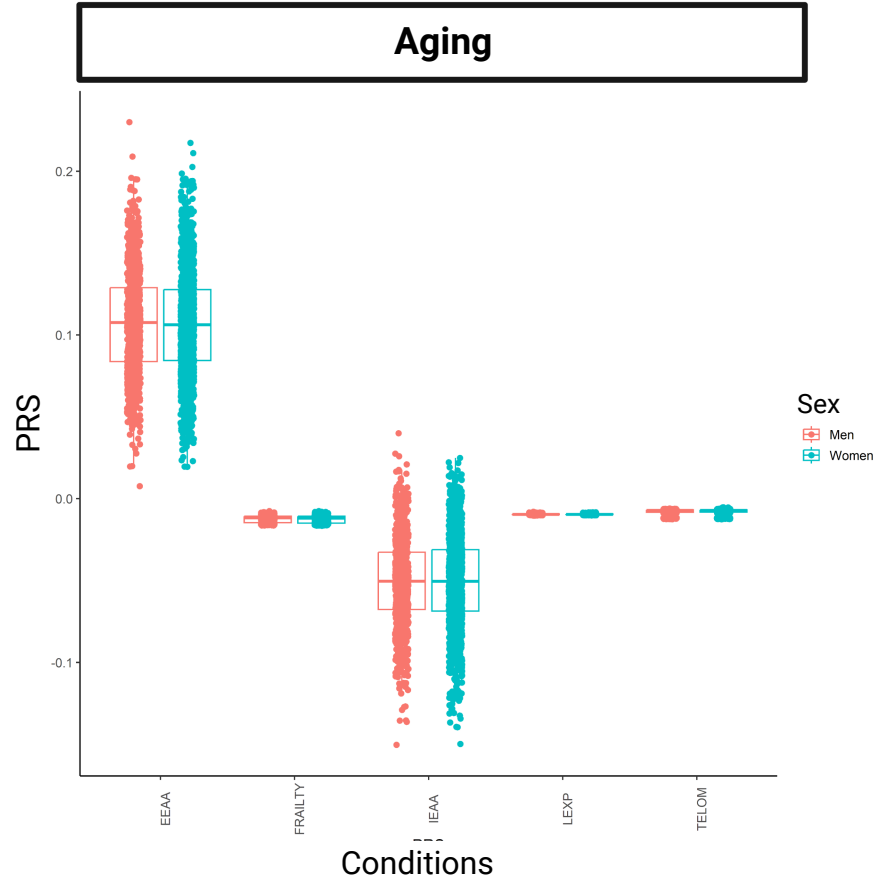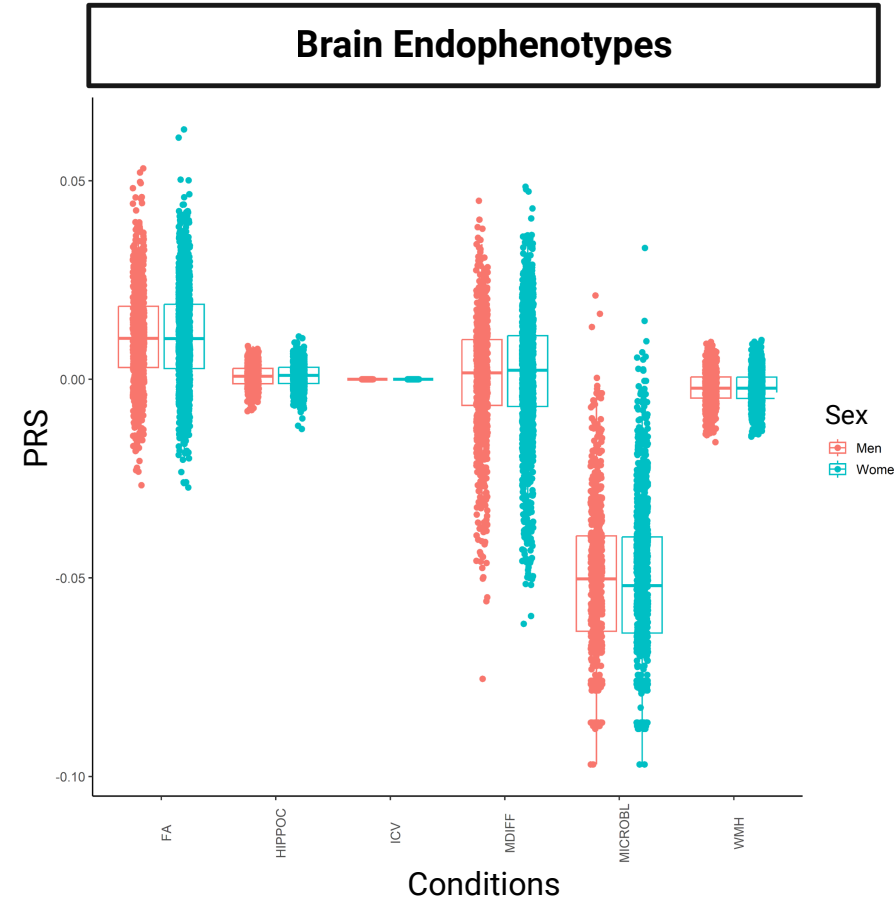

**Supplementary Figure S4.** Distribution of Polygenic Risk Scores by sex. Adjusted FDR p-values are reported.
