# Supplementary material for: Genetic characterization of the ALFA study: Uncovering genetic profiles in the Alzheimer's continuum
Source: PubMed Central journal article supplement — Alzheimers Dement. 2023 Dec 13;20(3):1703–15. doi: 10.1002/alz.13537 (PMC10984507; doi:10.1002/alz.13537), 2023-12-13
Supplement: ALZ-20-1703-s015.pdf [file ALZ-20-1703-s015.pdf]

## ICMJE DISCLOSURE FORM

**Date:** 9/12/2023

**Your Name:** [Natalia Vilor-Tejedor ]

**Manuscript Title:** [Genetic characterization of the ALFA study: Uncovering genetic profiles in the Alzheimer's continuum ]

**Manuscript Number (if known):** [Click or tap here to enter text.]

In the interest of transparency, we ask you to disclose all relationships/activities/interests listed below that are related to the content of your manuscript. "Related" means any relation with for-profit or not-for-profit third parties whose interests may be affected by the content of the manuscript. Disclosure represents a commitment to transparency and does not necessarily indicate a bias. If you are in doubt about whether to list a relationship/activity/interest, it is preferable that you do so.

The author's relationships/activities/interests should be defined broadly. For example, if your manuscript pertains to the epidemiology of hypertension, you should declare all relationships with manufacturers of antihypertensive medication, even if that medication is not mentioned in the manuscript.

In item #1 below, report all support for the work reported in this manuscript without time limit. For all other items, the time frame for disclosure is the past 36 months.

|                                                                                                                                                                                                                                                                                                                                                                                            |                                                                                                                                                                                | Name all entities with whom you have this relationship or indicate none (add rows as needed)                                                                                                                                                                                                                                                                                                                                                                                                                                                                                                                                                                                                                                                                                                                                                                                                                     | Specifications/Comments (e.g., if payments were made to you or to your institution)                                                        |  |                                                                                                                                                                                                                                                                                                                                                                                            |  |                                                                                                                    |                                           |  |
|--------------------------------------------------------------------------------------------------------------------------------------------------------------------------------------------------------------------------------------------------------------------------------------------------------------------------------------------------------------------------------------------|--------------------------------------------------------------------------------------------------------------------------------------------------------------------------------|------------------------------------------------------------------------------------------------------------------------------------------------------------------------------------------------------------------------------------------------------------------------------------------------------------------------------------------------------------------------------------------------------------------------------------------------------------------------------------------------------------------------------------------------------------------------------------------------------------------------------------------------------------------------------------------------------------------------------------------------------------------------------------------------------------------------------------------------------------------------------------------------------------------|--------------------------------------------------------------------------------------------------------------------------------------------|--|--------------------------------------------------------------------------------------------------------------------------------------------------------------------------------------------------------------------------------------------------------------------------------------------------------------------------------------------------------------------------------------------|--|--------------------------------------------------------------------------------------------------------------------|-------------------------------------------|--|
| <b>Time frame: Since the initial planning of the work</b>                                                                                                                                                                                                                                                                                                                                  |                                                                                                                                                                                |                                                                                                                                                                                                                                                                                                                                                                                                                                                                                                                                                                                                                                                                                                                                                                                                                                                                                                                  |                                                                                                                                            |  |                                                                                                                                                                                                                                                                                                                                                                                            |  |                                                                                                                    |                                           |  |
| <b>1</b>                                                                                                                                                                                                                                                                                                                                                                                   | All support for the present manuscript (e.g., funding, provision of study materials, medical writing, article processing charges, etc.)<br><b>No time limit for this item.</b> | <input type="checkbox"/> None <table border="1" style="width: 100%; margin-top: 10px;"> <tr> <td style="width: 70%;">[The project leading to these results has received funding from "la Caixa" Foundation (ID 100010434), under agreement LCF/PR/GN17/50300004</td> <td></td> </tr> <tr> <td>The project leading to these results has received funding from the Health Department of the Catalan Government (Health Research and Innovation Strategic Plan (PERIS) 2016-2020 grant# SLT002/16/00201). Additional support has been received from the Universities and Research Secretariat, Ministry of Business and Knowledge of the Catalan Government under grant no. 2021_SGR_00913.</td> <td></td> </tr> <tr> <td>The project leading to these results has received funding from the Alzheimer's Association (Grant AARG-19-618265).</td> <td>Click the tab key to add additional rows.</td> </tr> </table> | [The project leading to these results has received funding from "la Caixa" Foundation (ID 100010434), under agreement LCF/PR/GN17/50300004 |  | The project leading to these results has received funding from the Health Department of the Catalan Government (Health Research and Innovation Strategic Plan (PERIS) 2016-2020 grant# SLT002/16/00201). Additional support has been received from the Universities and Research Secretariat, Ministry of Business and Knowledge of the Catalan Government under grant no. 2021_SGR_00913. |  | The project leading to these results has received funding from the Alzheimer's Association (Grant AARG-19-618265). | Click the tab key to add additional rows. |  |
| [The project leading to these results has received funding from "la Caixa" Foundation (ID 100010434), under agreement LCF/PR/GN17/50300004                                                                                                                                                                                                                                                 |                                                                                                                                                                                |                                                                                                                                                                                                                                                                                                                                                                                                                                                                                                                                                                                                                                                                                                                                                                                                                                                                                                                  |                                                                                                                                            |  |                                                                                                                                                                                                                                                                                                                                                                                            |  |                                                                                                                    |                                           |  |
| The project leading to these results has received funding from the Health Department of the Catalan Government (Health Research and Innovation Strategic Plan (PERIS) 2016-2020 grant# SLT002/16/00201). Additional support has been received from the Universities and Research Secretariat, Ministry of Business and Knowledge of the Catalan Government under grant no. 2021_SGR_00913. |                                                                                                                                                                                |                                                                                                                                                                                                                                                                                                                                                                                                                                                                                                                                                                                                                                                                                                                                                                                                                                                                                                                  |                                                                                                                                            |  |                                                                                                                                                                                                                                                                                                                                                                                            |  |                                                                                                                    |                                           |  |
| The project leading to these results has received funding from the Alzheimer's Association (Grant AARG-19-618265).                                                                                                                                                                                                                                                                         | Click the tab key to add additional rows.                                                                                                                                      |                                                                                                                                                                                                                                                                                                                                                                                                                                                                                                                                                                                                                                                                                                                                                                                                                                                                                                                  |                                                                                                                                            |  |                                                                                                                                                                                                                                                                                                                                                                                            |  |                                                                                                                    |                                           |  |
| <b>Time frame: past 36 months</b>                                                                                                                                                                                                                                                                                                                                                          |                                                                                                                                                                                |                                                                                                                                                                                                                                                                                                                                                                                                                                                                                                                                                                                                                                                                                                                                                                                                                                                                                                                  |                                                                                                                                            |  |                                                                                                                                                                                                                                                                                                                                                                                            |  |                                                                                                                    |                                           |  |

|                                                                                                                                                                                     |                                                                                                              | Name all entities with whom you have this relationship or indicate none (add rows as needed)                                                                                                                                                                                                                | Specifications/Comments (e.g., if payments were made to you or to your institution) |                                                                                                                                                                                     |  |  |  |
|-------------------------------------------------------------------------------------------------------------------------------------------------------------------------------------|--------------------------------------------------------------------------------------------------------------|-------------------------------------------------------------------------------------------------------------------------------------------------------------------------------------------------------------------------------------------------------------------------------------------------------------|-------------------------------------------------------------------------------------|-------------------------------------------------------------------------------------------------------------------------------------------------------------------------------------|--|--|--|
| 2                                                                                                                                                                                   | Grants or contracts from any entity (if not indicated in item #1 above).                                     | <input type="checkbox"/> None                                                                                                                                                                                                                                                                               |                                                                                     |                                                                                                                                                                                     |  |  |  |
|                                                                                                                                                                                     |                                                                                                              | <table border="1"> <tr> <td>NV-T receive funding from the MCIN/AEI/10.13039/501100011033 and the European Union NextGenerationEU/PRTR, through the Juan de la Cierva Incorporación Programme (IJC2020-043216-I)</td> <td></td> </tr> <tr> <td></td> <td></td> </tr> <tr> <td></td> <td></td> </tr> </table> |                                                                                     | NV-T receive funding from the MCIN/AEI/10.13039/501100011033 and the European Union NextGenerationEU/PRTR, through the Juan de la Cierva Incorporación Programme (IJC2020-043216-I) |  |  |  |
| NV-T receive funding from the MCIN/AEI/10.13039/501100011033 and the European Union NextGenerationEU/PRTR, through the Juan de la Cierva Incorporación Programme (IJC2020-043216-I) |                                                                                                              |                                                                                                                                                                                                                                                                                                             |                                                                                     |                                                                                                                                                                                     |  |  |  |
|                                                                                                                                                                                     |                                                                                                              |                                                                                                                                                                                                                                                                                                             |                                                                                     |                                                                                                                                                                                     |  |  |  |
|                                                                                                                                                                                     |                                                                                                              |                                                                                                                                                                                                                                                                                                             |                                                                                     |                                                                                                                                                                                     |  |  |  |
| 3                                                                                                                                                                                   | Royalties or licenses                                                                                        | <input checked="" type="checkbox"/> None                                                                                                                                                                                                                                                                    |                                                                                     |                                                                                                                                                                                     |  |  |  |
|                                                                                                                                                                                     |                                                                                                              | <table border="1"> <tr> <td></td> <td></td> </tr> <tr> <td></td> <td></td> </tr> <tr> <td></td> <td></td> </tr> </table>                                                                                                                                                                                    |                                                                                     |                                                                                                                                                                                     |  |  |  |
|                                                                                                                                                                                     |                                                                                                              |                                                                                                                                                                                                                                                                                                             |                                                                                     |                                                                                                                                                                                     |  |  |  |
|                                                                                                                                                                                     |                                                                                                              |                                                                                                                                                                                                                                                                                                             |                                                                                     |                                                                                                                                                                                     |  |  |  |
|                                                                                                                                                                                     |                                                                                                              |                                                                                                                                                                                                                                                                                                             |                                                                                     |                                                                                                                                                                                     |  |  |  |
| 4                                                                                                                                                                                   | Consulting fees                                                                                              | <input checked="" type="checkbox"/> None                                                                                                                                                                                                                                                                    |                                                                                     |                                                                                                                                                                                     |  |  |  |
|                                                                                                                                                                                     |                                                                                                              | <table border="1"> <tr> <td></td> <td></td> </tr> <tr> <td></td> <td></td> </tr> <tr> <td></td> <td></td> </tr> </table>                                                                                                                                                                                    |                                                                                     |                                                                                                                                                                                     |  |  |  |
|                                                                                                                                                                                     |                                                                                                              |                                                                                                                                                                                                                                                                                                             |                                                                                     |                                                                                                                                                                                     |  |  |  |
|                                                                                                                                                                                     |                                                                                                              |                                                                                                                                                                                                                                                                                                             |                                                                                     |                                                                                                                                                                                     |  |  |  |
|                                                                                                                                                                                     |                                                                                                              |                                                                                                                                                                                                                                                                                                             |                                                                                     |                                                                                                                                                                                     |  |  |  |
| 5                                                                                                                                                                                   | Payment or honoraria for lectures, presentations, speakers bureaus, manuscript writing or educational events | <input checked="" type="checkbox"/> None                                                                                                                                                                                                                                                                    |                                                                                     |                                                                                                                                                                                     |  |  |  |
|                                                                                                                                                                                     |                                                                                                              | <table border="1"> <tr> <td></td> <td></td> </tr> <tr> <td></td> <td></td> </tr> <tr> <td></td> <td></td> </tr> </table>                                                                                                                                                                                    |                                                                                     |                                                                                                                                                                                     |  |  |  |
|                                                                                                                                                                                     |                                                                                                              |                                                                                                                                                                                                                                                                                                             |                                                                                     |                                                                                                                                                                                     |  |  |  |
|                                                                                                                                                                                     |                                                                                                              |                                                                                                                                                                                                                                                                                                             |                                                                                     |                                                                                                                                                                                     |  |  |  |
|                                                                                                                                                                                     |                                                                                                              |                                                                                                                                                                                                                                                                                                             |                                                                                     |                                                                                                                                                                                     |  |  |  |
| 6                                                                                                                                                                                   | Payment for expert testimony                                                                                 | <input checked="" type="checkbox"/> None                                                                                                                                                                                                                                                                    |                                                                                     |                                                                                                                                                                                     |  |  |  |
|                                                                                                                                                                                     |                                                                                                              | <table border="1"> <tr> <td></td> <td></td> </tr> <tr> <td></td> <td></td> </tr> <tr> <td></td> <td></td> </tr> </table>                                                                                                                                                                                    |                                                                                     |                                                                                                                                                                                     |  |  |  |
|                                                                                                                                                                                     |                                                                                                              |                                                                                                                                                                                                                                                                                                             |                                                                                     |                                                                                                                                                                                     |  |  |  |
|                                                                                                                                                                                     |                                                                                                              |                                                                                                                                                                                                                                                                                                             |                                                                                     |                                                                                                                                                                                     |  |  |  |
|                                                                                                                                                                                     |                                                                                                              |                                                                                                                                                                                                                                                                                                             |                                                                                     |                                                                                                                                                                                     |  |  |  |
| 7                                                                                                                                                                                   | Support for attending meetings and/or travel                                                                 | <input type="checkbox"/> None                                                                                                                                                                                                                                                                               |                                                                                     |                                                                                                                                                                                     |  |  |  |
|                                                                                                                                                                                     |                                                                                                              | <table border="1"> <tr> <td>NVT has received full registration and travel grants to present this research at the International Alzheimer's Conference in 2022 (San Diego) and 2023 (Amsterdam).</td> <td></td> </tr> <tr> <td></td> <td></td> </tr> <tr> <td></td> <td></td> </tr> </table>                 |                                                                                     | NVT has received full registration and travel grants to present this research at the International Alzheimer's Conference in 2022 (San Diego) and 2023 (Amsterdam).                 |  |  |  |
| NVT has received full registration and travel grants to present this research at the International Alzheimer's Conference in 2022 (San Diego) and 2023 (Amsterdam).                 |                                                                                                              |                                                                                                                                                                                                                                                                                                             |                                                                                     |                                                                                                                                                                                     |  |  |  |
|                                                                                                                                                                                     |                                                                                                              |                                                                                                                                                                                                                                                                                                             |                                                                                     |                                                                                                                                                                                     |  |  |  |
|                                                                                                                                                                                     |                                                                                                              |                                                                                                                                                                                                                                                                                                             |                                                                                     |                                                                                                                                                                                     |  |  |  |

|    |                                                                                                   | Name all entities with whom you have this relationship or indicate none (add rows as needed)                                                                                           | Specifications/Comments (e.g., if payments were made to you or to your institution) |  |  |  |  |  |  |
|----|---------------------------------------------------------------------------------------------------|----------------------------------------------------------------------------------------------------------------------------------------------------------------------------------------|-------------------------------------------------------------------------------------|--|--|--|--|--|--|
| 8  | Patents planned, issued or pending                                                                | <input checked="" type="checkbox"/> None<br><br><table border="1" style="width: 100%;"><tr><td> </td><td> </td></tr><tr><td> </td><td> </td></tr><tr><td> </td><td> </td></tr></table> |                                                                                     |  |  |  |  |  |  |
|    |                                                                                                   |                                                                                                                                                                                        |                                                                                     |  |  |  |  |  |  |
|    |                                                                                                   |                                                                                                                                                                                        |                                                                                     |  |  |  |  |  |  |
|    |                                                                                                   |                                                                                                                                                                                        |                                                                                     |  |  |  |  |  |  |
| 9  | Participation on a Data Safety Monitoring Board or Advisory Board                                 | <input checked="" type="checkbox"/> None<br><br><table border="1" style="width: 100%;"><tr><td> </td><td> </td></tr><tr><td> </td><td> </td></tr><tr><td> </td><td> </td></tr></table> |                                                                                     |  |  |  |  |  |  |
|    |                                                                                                   |                                                                                                                                                                                        |                                                                                     |  |  |  |  |  |  |
|    |                                                                                                   |                                                                                                                                                                                        |                                                                                     |  |  |  |  |  |  |
|    |                                                                                                   |                                                                                                                                                                                        |                                                                                     |  |  |  |  |  |  |
| 10 | Leadership or fiduciary role in other board, society, committee or advocacy group, paid or unpaid | <input checked="" type="checkbox"/> None<br><br><table border="1" style="width: 100%;"><tr><td> </td><td> </td></tr><tr><td> </td><td> </td></tr><tr><td> </td><td> </td></tr></table> |                                                                                     |  |  |  |  |  |  |
|    |                                                                                                   |                                                                                                                                                                                        |                                                                                     |  |  |  |  |  |  |
|    |                                                                                                   |                                                                                                                                                                                        |                                                                                     |  |  |  |  |  |  |
|    |                                                                                                   |                                                                                                                                                                                        |                                                                                     |  |  |  |  |  |  |
| 11 | Stock or stock options                                                                            | <input checked="" type="checkbox"/> None<br><br><table border="1" style="width: 100%;"><tr><td> </td><td> </td></tr><tr><td> </td><td> </td></tr><tr><td> </td><td> </td></tr></table> |                                                                                     |  |  |  |  |  |  |
|    |                                                                                                   |                                                                                                                                                                                        |                                                                                     |  |  |  |  |  |  |
|    |                                                                                                   |                                                                                                                                                                                        |                                                                                     |  |  |  |  |  |  |
|    |                                                                                                   |                                                                                                                                                                                        |                                                                                     |  |  |  |  |  |  |
| 12 | Receipt of equipment, materials, drugs, medical writing, gifts or other services                  | <input checked="" type="checkbox"/> None<br><br><table border="1" style="width: 100%;"><tr><td> </td><td> </td></tr><tr><td> </td><td> </td></tr><tr><td> </td><td> </td></tr></table> |                                                                                     |  |  |  |  |  |  |
|    |                                                                                                   |                                                                                                                                                                                        |                                                                                     |  |  |  |  |  |  |
|    |                                                                                                   |                                                                                                                                                                                        |                                                                                     |  |  |  |  |  |  |
|    |                                                                                                   |                                                                                                                                                                                        |                                                                                     |  |  |  |  |  |  |
| 13 | Other financial or non-financial interests                                                        | <input checked="" type="checkbox"/> None<br><br><table border="1" style="width: 100%;"><tr><td> </td><td> </td></tr><tr><td> </td><td> </td></tr><tr><td> </td><td> </td></tr></table> |                                                                                     |  |  |  |  |  |  |
|    |                                                                                                   |                                                                                                                                                                                        |                                                                                     |  |  |  |  |  |  |
|    |                                                                                                   |                                                                                                                                                                                        |                                                                                     |  |  |  |  |  |  |
|    |                                                                                                   |                                                                                                                                                                                        |                                                                                     |  |  |  |  |  |  |

**Please place an "X" next to the following statement to indicate your agreement:**

I certify that I have answered every question and have not altered the wording of any of the questions on this form.

## ICMJE DISCLOSURE FORM

**Date:** 9/12/2023

**Your Name:** Patricia Genius

**Manuscript Title:** Genetic characterization of the ALFA study: Uncovering genetic profiles in the Alzheimer's continuum

**Manuscript Number (if known):** [Click or tap here to enter text.](#)

In the interest of transparency, we ask you to disclose all relationships/activities/interests listed below that are related to the content of your manuscript. "Related" means any relation with for-profit or not-for-profit third parties whose interests may be affected by the content of the manuscript. Disclosure represents a commitment to transparency and does not necessarily indicate a bias. If you are in doubt about whether to list a relationship/activity/interest, it is preferable that you do so.

The author's relationships/activities/interests should be defined broadly. For example, if your manuscript pertains to the epidemiology of hypertension, you should declare all relationships with manufacturers of antihypertensive medication, even if that medication is not mentioned in the manuscript.

In item #1 below, report all support for the work reported in this manuscript without time limit. For all other items, the time frame for disclosure is the past 36 months.

|                                                           |                                                                                                                                                                                | Name all entities with whom you have this relationship or indicate none (add rows as needed)                                                                                                                                                                                                                                                                                               | Specifications/Comments (e.g., if payments were made to you or to your institution) |
|-----------------------------------------------------------|--------------------------------------------------------------------------------------------------------------------------------------------------------------------------------|--------------------------------------------------------------------------------------------------------------------------------------------------------------------------------------------------------------------------------------------------------------------------------------------------------------------------------------------------------------------------------------------|-------------------------------------------------------------------------------------|
| <b>Time frame: Since the initial planning of the work</b> |                                                                                                                                                                                |                                                                                                                                                                                                                                                                                                                                                                                            |                                                                                     |
| <b>1</b>                                                  | All support for the present manuscript (e.g., funding, provision of study materials, medical writing, article processing charges, etc.)<br><b>No time limit for this item.</b> | <input type="checkbox"/> None                                                                                                                                                                                                                                                                                                                                                              |                                                                                     |
|                                                           |                                                                                                                                                                                | The project leading to these results has received funding from "la Caixa" Foundation (ID 100010434), under agreement LCF/PR/GN17/50300004                                                                                                                                                                                                                                                  |                                                                                     |
|                                                           |                                                                                                                                                                                | The project leading to these results has received funding from the Health Department of the Catalan Government (Health Research and Innovation Strategic Plan (PERIS) 2016-2020 grant# SLT002/16/00201). Additional support has been received from the Universities and Research Secretariat, Ministry of Business and Knowledge of the Catalan Government under grant no. 2021_SGR_00913. |                                                                                     |
|                                                           |                                                                                                                                                                                | The project leading to these results has received funding from the Alzheimer's Association (Grant AARG-19-618265).                                                                                                                                                                                                                                                                         | <a href="#">Click the tab key to add additional rows.</a>                           |
| <b>Time frame: past 36 months</b>                         |                                                                                                                                                                                |                                                                                                                                                                                                                                                                                                                                                                                            |                                                                                     |

|          |                                                                                                              | Name all entities with whom you have this relationship or indicate none (add rows as needed)                                                                                                                                                                                                                                                                           | Specifications/Comments (e.g., if payments were made to you or to your institution) |  |  |  |  |  |  |  |  |
|----------|--------------------------------------------------------------------------------------------------------------|------------------------------------------------------------------------------------------------------------------------------------------------------------------------------------------------------------------------------------------------------------------------------------------------------------------------------------------------------------------------|-------------------------------------------------------------------------------------|--|--|--|--|--|--|--|--|
| <b>2</b> | Grants or contracts from any entity (if not indicated in item #1 above).                                     | <input checked="" type="checkbox"/> <b>None</b><br><table border="1" style="width: 100%; border-collapse: collapse;"> <tr><td style="width: 50%; height: 20px;"></td><td style="width: 50%;"></td></tr> <tr><td style="height: 20px;"></td><td></td></tr> <tr><td style="height: 20px;"></td><td></td></tr> </table>                                                   |                                                                                     |  |  |  |  |  |  |  |  |
|          |                                                                                                              |                                                                                                                                                                                                                                                                                                                                                                        |                                                                                     |  |  |  |  |  |  |  |  |
|          |                                                                                                              |                                                                                                                                                                                                                                                                                                                                                                        |                                                                                     |  |  |  |  |  |  |  |  |
|          |                                                                                                              |                                                                                                                                                                                                                                                                                                                                                                        |                                                                                     |  |  |  |  |  |  |  |  |
| <b>3</b> | Royalties or licenses                                                                                        | <input checked="" type="checkbox"/> <b>None</b><br><table border="1" style="width: 100%; border-collapse: collapse;"> <tr><td style="width: 50%; height: 20px;"></td><td style="width: 50%;"></td></tr> <tr><td style="height: 20px;"></td><td></td></tr> <tr><td style="height: 20px;"></td><td></td></tr> </table>                                                   |                                                                                     |  |  |  |  |  |  |  |  |
|          |                                                                                                              |                                                                                                                                                                                                                                                                                                                                                                        |                                                                                     |  |  |  |  |  |  |  |  |
|          |                                                                                                              |                                                                                                                                                                                                                                                                                                                                                                        |                                                                                     |  |  |  |  |  |  |  |  |
|          |                                                                                                              |                                                                                                                                                                                                                                                                                                                                                                        |                                                                                     |  |  |  |  |  |  |  |  |
| <b>4</b> | Consulting fees                                                                                              | <input checked="" type="checkbox"/> <b>None</b><br><table border="1" style="width: 100%; border-collapse: collapse;"> <tr><td style="width: 50%; height: 20px;"></td><td style="width: 50%;"></td></tr> <tr><td style="height: 20px;"></td><td></td></tr> <tr><td style="height: 20px;"></td><td></td></tr> <tr><td style="height: 20px;"></td><td></td></tr> </table> |                                                                                     |  |  |  |  |  |  |  |  |
|          |                                                                                                              |                                                                                                                                                                                                                                                                                                                                                                        |                                                                                     |  |  |  |  |  |  |  |  |
|          |                                                                                                              |                                                                                                                                                                                                                                                                                                                                                                        |                                                                                     |  |  |  |  |  |  |  |  |
|          |                                                                                                              |                                                                                                                                                                                                                                                                                                                                                                        |                                                                                     |  |  |  |  |  |  |  |  |
|          |                                                                                                              |                                                                                                                                                                                                                                                                                                                                                                        |                                                                                     |  |  |  |  |  |  |  |  |
| <b>5</b> | Payment or honoraria for lectures, presentations, speakers bureaus, manuscript writing or educational events | <input checked="" type="checkbox"/> <b>None</b><br><table border="1" style="width: 100%; border-collapse: collapse;"> <tr><td style="width: 50%; height: 20px;"></td><td style="width: 50%;"></td></tr> <tr><td style="height: 20px;"></td><td></td></tr> <tr><td style="height: 20px;"></td><td></td></tr> </table>                                                   |                                                                                     |  |  |  |  |  |  |  |  |
|          |                                                                                                              |                                                                                                                                                                                                                                                                                                                                                                        |                                                                                     |  |  |  |  |  |  |  |  |
|          |                                                                                                              |                                                                                                                                                                                                                                                                                                                                                                        |                                                                                     |  |  |  |  |  |  |  |  |
|          |                                                                                                              |                                                                                                                                                                                                                                                                                                                                                                        |                                                                                     |  |  |  |  |  |  |  |  |
| <b>6</b> | Payment for expert testimony                                                                                 | <input checked="" type="checkbox"/> <b>None</b><br><table border="1" style="width: 100%; border-collapse: collapse;"> <tr><td style="width: 50%; height: 20px;"></td><td style="width: 50%;"></td></tr> <tr><td style="height: 20px;"></td><td></td></tr> <tr><td style="height: 20px;"></td><td></td></tr> </table>                                                   |                                                                                     |  |  |  |  |  |  |  |  |
|          |                                                                                                              |                                                                                                                                                                                                                                                                                                                                                                        |                                                                                     |  |  |  |  |  |  |  |  |
|          |                                                                                                              |                                                                                                                                                                                                                                                                                                                                                                        |                                                                                     |  |  |  |  |  |  |  |  |
|          |                                                                                                              |                                                                                                                                                                                                                                                                                                                                                                        |                                                                                     |  |  |  |  |  |  |  |  |
| <b>7</b> | Support for attending meetings and/or travel                                                                 | <input checked="" type="checkbox"/> <b>None</b><br><table border="1" style="width: 100%; border-collapse: collapse;"> <tr><td style="width: 50%; height: 20px;"></td><td style="width: 50%;"></td></tr> <tr><td style="height: 20px;"></td><td></td></tr> <tr><td style="height: 20px;"></td><td></td></tr> </table>                                                   |                                                                                     |  |  |  |  |  |  |  |  |
|          |                                                                                                              |                                                                                                                                                                                                                                                                                                                                                                        |                                                                                     |  |  |  |  |  |  |  |  |
|          |                                                                                                              |                                                                                                                                                                                                                                                                                                                                                                        |                                                                                     |  |  |  |  |  |  |  |  |
|          |                                                                                                              |                                                                                                                                                                                                                                                                                                                                                                        |                                                                                     |  |  |  |  |  |  |  |  |
| <b>8</b> | Patents planned, issued or pending                                                                           | <input checked="" type="checkbox"/> <b>None</b><br><table border="1" style="width: 100%; border-collapse: collapse;"> <tr><td style="width: 50%; height: 20px;"></td><td style="width: 50%;"></td></tr> <tr><td style="height: 20px;"></td><td></td></tr> <tr><td style="height: 20px;"></td><td></td></tr> </table>                                                   |                                                                                     |  |  |  |  |  |  |  |  |
|          |                                                                                                              |                                                                                                                                                                                                                                                                                                                                                                        |                                                                                     |  |  |  |  |  |  |  |  |
|          |                                                                                                              |                                                                                                                                                                                                                                                                                                                                                                        |                                                                                     |  |  |  |  |  |  |  |  |
|          |                                                                                                              |                                                                                                                                                                                                                                                                                                                                                                        |                                                                                     |  |  |  |  |  |  |  |  |
| <b>9</b> | Participation on a Data Safety                                                                               | <input checked="" type="checkbox"/> <b>None</b>                                                                                                                                                                                                                                                                                                                        |                                                                                     |  |  |  |  |  |  |  |  |

|           |                                                                                                   | Name all entities with whom you have this relationship or indicate none (add rows as needed) | Specifications/Comments (e.g., if payments were made to you or to your institution) |
|-----------|---------------------------------------------------------------------------------------------------|----------------------------------------------------------------------------------------------|-------------------------------------------------------------------------------------|
|           | Monitoring Board or Advisory Board                                                                |                                                                                              |                                                                                     |
| <b>10</b> | Leadership or fiduciary role in other board, society, committee or advocacy group, paid or unpaid | <input checked="" type="checkbox"/> <b>None</b>                                              |                                                                                     |
| <b>11</b> | Stock or stock options                                                                            | <input checked="" type="checkbox"/> <b>None</b>                                              |                                                                                     |
| <b>12</b> | Receipt of equipment, materials, drugs, medical writing, gifts or other services                  | <input checked="" type="checkbox"/> <b>None</b>                                              |                                                                                     |
| <b>13</b> | Other financial or non-financial interests                                                        | <input checked="" type="checkbox"/> <b>None</b>                                              |                                                                                     |

Please place an "X" next to the following statement to indicate your agreement:

I certify that I have answered every question and have not altered the wording of any of the questions on this form.

## ICMJE DISCLOSURE FORM

**Date:** 9/12/2023

**Your Name:** Blanca Rodríguez-Fernández

**Manuscript Title:** Genetic characterization of the ALFA study: Uncovering genetic profiles in the Alzheimer's continuum

**Manuscript Number (if known):** Click or tap here to enter text.

In the interest of transparency, we ask you to disclose all relationships/activities/interests listed below that are related to the content of your manuscript. "Related" means any relation with for-profit or not-for-profit third parties whose interests may be affected by the content of the manuscript. Disclosure represents a commitment to transparency and does not necessarily indicate a bias. If you are in doubt about whether to list a relationship/activity/interest, it is preferable that you do so.

The author's relationships/activities/interests should be defined broadly. For example, if your manuscript pertains to the epidemiology of hypertension, you should declare all relationships with manufacturers of antihypertensive medication, even if that medication is not mentioned in the manuscript.

In item #1 below, report all support for the work reported in this manuscript without time limit. For all other items, the time frame for disclosure is the past 36 months.

|                                                           |                                                                                                                                                                                | Name all entities with whom you have this relationship or indicate none (add rows as needed)                                                                                                                                                                                                                                                                                               | Specifications/Comments (e.g., if payments were made to you or to your institution) |
|-----------------------------------------------------------|--------------------------------------------------------------------------------------------------------------------------------------------------------------------------------|--------------------------------------------------------------------------------------------------------------------------------------------------------------------------------------------------------------------------------------------------------------------------------------------------------------------------------------------------------------------------------------------|-------------------------------------------------------------------------------------|
| <b>Time frame: Since the initial planning of the work</b> |                                                                                                                                                                                |                                                                                                                                                                                                                                                                                                                                                                                            |                                                                                     |
| <b>1</b>                                                  | All support for the present manuscript (e.g., funding, provision of study materials, medical writing, article processing charges, etc.)<br><b>No time limit for this item.</b> | <input type="checkbox"/> None                                                                                                                                                                                                                                                                                                                                                              |                                                                                     |
|                                                           |                                                                                                                                                                                | The project leading to these results has received funding from "la Caixa" Foundation (ID 100010434), under agreement LCF/PR/GN17/50300004                                                                                                                                                                                                                                                  |                                                                                     |
|                                                           |                                                                                                                                                                                | The project leading to these results has received funding from the Health Department of the Catalan Government (Health Research and Innovation Strategic Plan (PERIS) 2016-2020 grant# SLT002/16/00201). Additional support has been received from the Universities and Research Secretariat, Ministry of Business and Knowledge of the Catalan Government under grant no. 2021_SGR_00913. |                                                                                     |
|                                                           |                                                                                                                                                                                | The project leading to these results has received funding from the Alzheimer's Association (Grant AARG-19-618265).                                                                                                                                                                                                                                                                         | Click the tab key to add additional rows.                                           |
| <b>Time frame: past 36 months</b>                         |                                                                                                                                                                                |                                                                                                                                                                                                                                                                                                                                                                                            |                                                                                     |

|          |                                                                                                              | Name all entities with whom you have this relationship or indicate none (add rows as needed) | Specifications/Comments (e.g., if payments were made to you or to your institution) |
|----------|--------------------------------------------------------------------------------------------------------------|----------------------------------------------------------------------------------------------|-------------------------------------------------------------------------------------|
| <b>2</b> | Grants or contracts from any entity (if not indicated in item #1 above).                                     | <input checked="" type="checkbox"/> <b>None</b>                                              |                                                                                     |
|          |                                                                                                              |                                                                                              |                                                                                     |
|          |                                                                                                              |                                                                                              |                                                                                     |
| <b>3</b> | Royalties or licenses                                                                                        | <input checked="" type="checkbox"/> <b>None</b>                                              |                                                                                     |
|          |                                                                                                              |                                                                                              |                                                                                     |
|          |                                                                                                              |                                                                                              |                                                                                     |
| <b>4</b> | Consulting fees                                                                                              | <input checked="" type="checkbox"/> <b>None</b>                                              |                                                                                     |
|          |                                                                                                              |                                                                                              |                                                                                     |
|          |                                                                                                              |                                                                                              |                                                                                     |
| <b>5</b> | Payment or honoraria for lectures, presentations, speakers bureaus, manuscript writing or educational events | <input checked="" type="checkbox"/> <b>None</b>                                              |                                                                                     |
|          |                                                                                                              |                                                                                              |                                                                                     |
|          |                                                                                                              |                                                                                              |                                                                                     |
| <b>6</b> | Payment for expert testimony                                                                                 | <input checked="" type="checkbox"/> <b>None</b>                                              |                                                                                     |
|          |                                                                                                              |                                                                                              |                                                                                     |
|          |                                                                                                              |                                                                                              |                                                                                     |
| <b>7</b> | Support for attending meetings and/or travel                                                                 | <input checked="" type="checkbox"/> <b>None</b>                                              |                                                                                     |
|          |                                                                                                              |                                                                                              |                                                                                     |
|          |                                                                                                              |                                                                                              |                                                                                     |
| <b>8</b> | Patents planned, issued or pending                                                                           | <input checked="" type="checkbox"/> <b>None</b>                                              |                                                                                     |
|          |                                                                                                              |                                                                                              |                                                                                     |
|          |                                                                                                              |                                                                                              |                                                                                     |
| <b>9</b> | Participation on a Data Safety                                                                               | <input checked="" type="checkbox"/> <b>None</b>                                              |                                                                                     |



|           |                                                                                                   | Name all entities with whom you have this relationship or indicate none (add rows as needed) | Specifications/Comments (e.g., if payments were made to you or to your institution) |
|-----------|---------------------------------------------------------------------------------------------------|----------------------------------------------------------------------------------------------|-------------------------------------------------------------------------------------|
|           | Monitoring Board or Advisory Board                                                                |                                                                                              |                                                                                     |
| <b>10</b> | Leadership or fiduciary role in other board, society, committee or advocacy group, paid or unpaid | <input checked="" type="checkbox"/> <b>None</b>                                              |                                                                                     |
| <b>11</b> | Stock or stock options                                                                            | <input checked="" type="checkbox"/> <b>None</b>                                              |                                                                                     |
| <b>12</b> | Receipt of equipment, materials, drugs, medical writing, gifts or other services                  | <input checked="" type="checkbox"/> <b>None</b>                                              |                                                                                     |
| <b>13</b> | Other financial or non-financial interests                                                        | <input checked="" type="checkbox"/> <b>None</b>                                              |                                                                                     |

Please place an "X" next to the following statement to indicate your agreement:

I certify that I have answered every question and have not altered the wording of any of the questions on this form.

## ICMJE DISCLOSURE FORM

**Date:** 9/12/2023

**Your Name:** Carolina Minguillon

**Manuscript Title:** Genetic characterization of the ALFA study: Uncovering genetic profiles in the Alzheimer's continuum

**Manuscript Number (if known):** [Click or tap here to enter text.](#)

In the interest of transparency, we ask you to disclose all relationships/activities/interests listed below that are related to the content of your manuscript. "Related" means any relation with for-profit or not-for-profit third parties whose interests may be affected by the content of the manuscript. Disclosure represents a commitment to transparency and does not necessarily indicate a bias. If you are in doubt about whether to list a relationship/activity/interest, it is preferable that you do so.

The author's relationships/activities/interests should be defined broadly. For example, if your manuscript pertains to the epidemiology of hypertension, you should declare all relationships with manufacturers of antihypertensive medication, even if that medication is not mentioned in the manuscript.

In item #1 below, report all support for the work reported in this manuscript without time limit. For all other items, the time frame for disclosure is the past 36 months.

|                                                                                                                                                                                         |                                                                                                                                                                                                                                                                                                                                                                                            | Name all entities with whom you have this relationship or indicate none (add rows as needed) | Specifications/Comments (e.g., if payments were made to you or to your institution) |
|-----------------------------------------------------------------------------------------------------------------------------------------------------------------------------------------|--------------------------------------------------------------------------------------------------------------------------------------------------------------------------------------------------------------------------------------------------------------------------------------------------------------------------------------------------------------------------------------------|----------------------------------------------------------------------------------------------|-------------------------------------------------------------------------------------|
| <b>Time frame: Since the initial planning of the work</b>                                                                                                                               |                                                                                                                                                                                                                                                                                                                                                                                            |                                                                                              |                                                                                     |
| <b>1</b> All support for the present manuscript (e.g., funding, provision of study materials, medical writing, article processing charges, etc.)<br><b>No time limit for this item.</b> | <input type="checkbox"/> None                                                                                                                                                                                                                                                                                                                                                              |                                                                                              |                                                                                     |
|                                                                                                                                                                                         | The project leading to these results has received funding from "la Caixa" Foundation (ID 100010434), under agreement LCF/PR/GN17/50300004                                                                                                                                                                                                                                                  |                                                                                              |                                                                                     |
|                                                                                                                                                                                         | The project leading to these results has received funding from the Health Department of the Catalan Government (Health Research and Innovation Strategic Plan (PERIS) 2016-2020 grant# SLT002/16/00201). Additional support has been received from the Universities and Research Secretariat, Ministry of Business and Knowledge of the Catalan Government under grant no. 2021_SGR_00913. |                                                                                              |                                                                                     |
|                                                                                                                                                                                         | The project leading to these results has received funding from the Alzheimer's Association (Grant AARG-19-618265).                                                                                                                                                                                                                                                                         |                                                                                              | Click the tab key to add additional rows.                                           |
| <b>Time frame: past 36 months</b>                                                                                                                                                       |                                                                                                                                                                                                                                                                                                                                                                                            |                                                                                              |                                                                                     |

|   |                                                                                                              | Name all entities with whom you have this relationship or indicate none (add rows as needed)                                                                                                    | Specifications/Comments (e.g., if payments were made to you or to your institution) |  |  |  |  |  |  |  |  |
|---|--------------------------------------------------------------------------------------------------------------|-------------------------------------------------------------------------------------------------------------------------------------------------------------------------------------------------|-------------------------------------------------------------------------------------|--|--|--|--|--|--|--|--|
| 2 | Grants or contracts from any entity (if not indicated in item #1 above).                                     | <input checked="" type="checkbox"/> None<br><table border="1"> <tr><td> </td><td> </td></tr> <tr><td> </td><td> </td></tr> <tr><td> </td><td> </td></tr> </table>                               |                                                                                     |  |  |  |  |  |  |  |  |
|   |                                                                                                              |                                                                                                                                                                                                 |                                                                                     |  |  |  |  |  |  |  |  |
|   |                                                                                                              |                                                                                                                                                                                                 |                                                                                     |  |  |  |  |  |  |  |  |
|   |                                                                                                              |                                                                                                                                                                                                 |                                                                                     |  |  |  |  |  |  |  |  |
| 3 | Royalties or licenses                                                                                        | <input checked="" type="checkbox"/> None<br><table border="1"> <tr><td> </td><td> </td></tr> <tr><td> </td><td> </td></tr> <tr><td> </td><td> </td></tr> </table>                               |                                                                                     |  |  |  |  |  |  |  |  |
|   |                                                                                                              |                                                                                                                                                                                                 |                                                                                     |  |  |  |  |  |  |  |  |
|   |                                                                                                              |                                                                                                                                                                                                 |                                                                                     |  |  |  |  |  |  |  |  |
|   |                                                                                                              |                                                                                                                                                                                                 |                                                                                     |  |  |  |  |  |  |  |  |
| 4 | Consulting fees                                                                                              | <input checked="" type="checkbox"/> None<br><table border="1"> <tr><td> </td><td> </td></tr> <tr><td> </td><td> </td></tr> <tr><td> </td><td> </td></tr> <tr><td> </td><td> </td></tr> </table> |                                                                                     |  |  |  |  |  |  |  |  |
|   |                                                                                                              |                                                                                                                                                                                                 |                                                                                     |  |  |  |  |  |  |  |  |
|   |                                                                                                              |                                                                                                                                                                                                 |                                                                                     |  |  |  |  |  |  |  |  |
|   |                                                                                                              |                                                                                                                                                                                                 |                                                                                     |  |  |  |  |  |  |  |  |
|   |                                                                                                              |                                                                                                                                                                                                 |                                                                                     |  |  |  |  |  |  |  |  |
| 5 | Payment or honoraria for lectures, presentations, speakers bureaus, manuscript writing or educational events | <input checked="" type="checkbox"/> None<br><table border="1"> <tr><td> </td><td> </td></tr> <tr><td> </td><td> </td></tr> <tr><td> </td><td> </td></tr> </table>                               |                                                                                     |  |  |  |  |  |  |  |  |
|   |                                                                                                              |                                                                                                                                                                                                 |                                                                                     |  |  |  |  |  |  |  |  |
|   |                                                                                                              |                                                                                                                                                                                                 |                                                                                     |  |  |  |  |  |  |  |  |
|   |                                                                                                              |                                                                                                                                                                                                 |                                                                                     |  |  |  |  |  |  |  |  |
| 6 | Payment for expert testimony                                                                                 | <input checked="" type="checkbox"/> None<br><table border="1"> <tr><td> </td><td> </td></tr> <tr><td> </td><td> </td></tr> <tr><td> </td><td> </td></tr> </table>                               |                                                                                     |  |  |  |  |  |  |  |  |
|   |                                                                                                              |                                                                                                                                                                                                 |                                                                                     |  |  |  |  |  |  |  |  |
|   |                                                                                                              |                                                                                                                                                                                                 |                                                                                     |  |  |  |  |  |  |  |  |
|   |                                                                                                              |                                                                                                                                                                                                 |                                                                                     |  |  |  |  |  |  |  |  |
| 7 | Support for attending meetings and/or travel                                                                 | <input checked="" type="checkbox"/> None<br><table border="1"> <tr><td> </td><td> </td></tr> <tr><td> </td><td> </td></tr> <tr><td> </td><td> </td></tr> </table>                               |                                                                                     |  |  |  |  |  |  |  |  |
|   |                                                                                                              |                                                                                                                                                                                                 |                                                                                     |  |  |  |  |  |  |  |  |
|   |                                                                                                              |                                                                                                                                                                                                 |                                                                                     |  |  |  |  |  |  |  |  |
|   |                                                                                                              |                                                                                                                                                                                                 |                                                                                     |  |  |  |  |  |  |  |  |
| 8 | Patents planned, issued or pending                                                                           | <input checked="" type="checkbox"/> None<br><table border="1"> <tr><td> </td><td> </td></tr> <tr><td> </td><td> </td></tr> <tr><td> </td><td> </td></tr> </table>                               |                                                                                     |  |  |  |  |  |  |  |  |
|   |                                                                                                              |                                                                                                                                                                                                 |                                                                                     |  |  |  |  |  |  |  |  |
|   |                                                                                                              |                                                                                                                                                                                                 |                                                                                     |  |  |  |  |  |  |  |  |
|   |                                                                                                              |                                                                                                                                                                                                 |                                                                                     |  |  |  |  |  |  |  |  |
| 9 | Participation on a Data Safety                                                                               | <input checked="" type="checkbox"/> None                                                                                                                                                        |                                                                                     |  |  |  |  |  |  |  |  |

|           |                                                                                                   | Name all entities with whom you have this relationship or indicate none (add rows as needed) | Specifications/Comments (e.g., if payments were made to you or to your institution) |
|-----------|---------------------------------------------------------------------------------------------------|----------------------------------------------------------------------------------------------|-------------------------------------------------------------------------------------|
|           | Monitoring Board or Advisory Board                                                                | <input type="checkbox"/>                                                                     |                                                                                     |
|           |                                                                                                   | <input type="checkbox"/>                                                                     |                                                                                     |
|           |                                                                                                   | <input type="checkbox"/>                                                                     |                                                                                     |
| <b>10</b> | Leadership or fiduciary role in other board, society, committee or advocacy group, paid or unpaid | <input checked="" type="checkbox"/> <b>None</b>                                              |                                                                                     |
|           |                                                                                                   | <input type="checkbox"/>                                                                     |                                                                                     |
|           |                                                                                                   | <input type="checkbox"/>                                                                     |                                                                                     |
|           |                                                                                                   | <input type="checkbox"/>                                                                     |                                                                                     |
| <b>11</b> | Stock or stock options                                                                            | <input checked="" type="checkbox"/> <b>None</b>                                              |                                                                                     |
|           |                                                                                                   | <input type="checkbox"/>                                                                     |                                                                                     |
|           |                                                                                                   | <input type="checkbox"/>                                                                     |                                                                                     |
|           |                                                                                                   | <input type="checkbox"/>                                                                     |                                                                                     |
| <b>12</b> | Receipt of equipment, materials, drugs, medical writing, gifts or other services                  | <input checked="" type="checkbox"/> <b>None</b>                                              |                                                                                     |
|           |                                                                                                   | <input type="checkbox"/>                                                                     |                                                                                     |
|           |                                                                                                   | <input type="checkbox"/>                                                                     |                                                                                     |
|           |                                                                                                   | <input type="checkbox"/>                                                                     |                                                                                     |
| <b>13</b> | Other financial or non-financial interests                                                        | <input checked="" type="checkbox"/> <b>None</b>                                              |                                                                                     |
|           |                                                                                                   | <input type="checkbox"/>                                                                     |                                                                                     |
|           |                                                                                                   | <input type="checkbox"/>                                                                     |                                                                                     |
|           |                                                                                                   | <input type="checkbox"/>                                                                     |                                                                                     |

Please place an "X" next to the following statement to indicate your agreement:

I certify that I have answered every question and have not altered the wording of any of the questions on this form.

## ICMJE DISCLOSURE FORM

**Date:** 9/12/2023

**Your Name:** Iman Sadeghi

**Manuscript Title:** Genetic characterization of the ALFA study: Uncovering genetic profiles in the Alzheimer's continuum

**Manuscript Number (if known):** Click or tap here to enter text.

In the interest of transparency, we ask you to disclose all relationships/activities/interests listed below that are related to the content of your manuscript. "Related" means any relation with for-profit or not-for-profit third parties whose interests may be affected by the content of the manuscript. Disclosure represents a commitment to transparency and does not necessarily indicate a bias. If you are in doubt about whether to list a relationship/activity/interest, it is preferable that you do so.

The author's relationships/activities/interests should be defined broadly. For example, if your manuscript pertains to the epidemiology of hypertension, you should declare all relationships with manufacturers of antihypertensive medication, even if that medication is not mentioned in the manuscript.

In item #1 below, report all support for the work reported in this manuscript without time limit. For all other items, the time frame for disclosure is the past 36 months.

|                                                                                                                                                                                         |                                                                                                                                                                                                                                                                                                                                                                                            | Name all entities with whom you have this relationship or indicate none (add rows as needed) | Specifications/Comments (e.g., if payments were made to you or to your institution) |
|-----------------------------------------------------------------------------------------------------------------------------------------------------------------------------------------|--------------------------------------------------------------------------------------------------------------------------------------------------------------------------------------------------------------------------------------------------------------------------------------------------------------------------------------------------------------------------------------------|----------------------------------------------------------------------------------------------|-------------------------------------------------------------------------------------|
| <b>Time frame: Since the initial planning of the work</b>                                                                                                                               |                                                                                                                                                                                                                                                                                                                                                                                            |                                                                                              |                                                                                     |
| <b>1</b> All support for the present manuscript (e.g., funding, provision of study materials, medical writing, article processing charges, etc.)<br><b>No time limit for this item.</b> | <input type="checkbox"/> None                                                                                                                                                                                                                                                                                                                                                              |                                                                                              |                                                                                     |
|                                                                                                                                                                                         | The project leading to these results has received funding from "la Caixa" Foundation (ID 100010434), under agreement LCF/PR/GN17/50300004                                                                                                                                                                                                                                                  |                                                                                              |                                                                                     |
|                                                                                                                                                                                         | The project leading to these results has received funding from the Health Department of the Catalan Government (Health Research and Innovation Strategic Plan (PERIS) 2016-2020 grant# SLT002/16/00201). Additional support has been received from the Universities and Research Secretariat, Ministry of Business and Knowledge of the Catalan Government under grant no. 2021_SGR_00913. |                                                                                              |                                                                                     |
|                                                                                                                                                                                         | The project leading to these results has received funding from the Alzheimer's Association (Grant AARG-19-618265).                                                                                                                                                                                                                                                                         |                                                                                              | Click the tab key to add additional rows.                                           |
| <b>Time frame: past 36 months</b>                                                                                                                                                       |                                                                                                                                                                                                                                                                                                                                                                                            |                                                                                              |                                                                                     |

|   |                                                                                                              | Name all entities with whom you have this relationship or indicate none (add rows as needed)                                                                                                                                                                                                                                                                                                                                                    | Specifications/Comments (e.g., if payments were made to you or to your institution) |  |  |  |  |  |  |  |  |
|---|--------------------------------------------------------------------------------------------------------------|-------------------------------------------------------------------------------------------------------------------------------------------------------------------------------------------------------------------------------------------------------------------------------------------------------------------------------------------------------------------------------------------------------------------------------------------------|-------------------------------------------------------------------------------------|--|--|--|--|--|--|--|--|
| 2 | Grants or contracts from any entity (if not indicated in item #1 above).                                     | <input checked="" type="checkbox"/> None<br><table border="1" style="width: 100%; border-collapse: collapse;"> <tr><td style="width: 50%; height: 15px;"></td><td style="width: 50%; height: 15px;"></td></tr> <tr><td style="height: 15px;"></td><td style="height: 15px;"></td></tr> <tr><td style="height: 15px;"></td><td style="height: 15px;"></td></tr> </table>                                                                         |                                                                                     |  |  |  |  |  |  |  |  |
|   |                                                                                                              |                                                                                                                                                                                                                                                                                                                                                                                                                                                 |                                                                                     |  |  |  |  |  |  |  |  |
|   |                                                                                                              |                                                                                                                                                                                                                                                                                                                                                                                                                                                 |                                                                                     |  |  |  |  |  |  |  |  |
|   |                                                                                                              |                                                                                                                                                                                                                                                                                                                                                                                                                                                 |                                                                                     |  |  |  |  |  |  |  |  |
| 3 | Royalties or licenses                                                                                        | <input checked="" type="checkbox"/> None<br><table border="1" style="width: 100%; border-collapse: collapse;"> <tr><td style="width: 50%; height: 15px;"></td><td style="width: 50%; height: 15px;"></td></tr> <tr><td style="height: 15px;"></td><td style="height: 15px;"></td></tr> <tr><td style="height: 15px;"></td><td style="height: 15px;"></td></tr> </table>                                                                         |                                                                                     |  |  |  |  |  |  |  |  |
|   |                                                                                                              |                                                                                                                                                                                                                                                                                                                                                                                                                                                 |                                                                                     |  |  |  |  |  |  |  |  |
|   |                                                                                                              |                                                                                                                                                                                                                                                                                                                                                                                                                                                 |                                                                                     |  |  |  |  |  |  |  |  |
|   |                                                                                                              |                                                                                                                                                                                                                                                                                                                                                                                                                                                 |                                                                                     |  |  |  |  |  |  |  |  |
| 4 | Consulting fees                                                                                              | <input checked="" type="checkbox"/> None<br><table border="1" style="width: 100%; border-collapse: collapse;"> <tr><td style="width: 50%; height: 15px;"></td><td style="width: 50%; height: 15px;"></td></tr> <tr><td style="height: 15px;"></td><td style="height: 15px;"></td></tr> <tr><td style="height: 15px;"></td><td style="height: 15px;"></td></tr> <tr><td style="height: 15px;"></td><td style="height: 15px;"></td></tr> </table> |                                                                                     |  |  |  |  |  |  |  |  |
|   |                                                                                                              |                                                                                                                                                                                                                                                                                                                                                                                                                                                 |                                                                                     |  |  |  |  |  |  |  |  |
|   |                                                                                                              |                                                                                                                                                                                                                                                                                                                                                                                                                                                 |                                                                                     |  |  |  |  |  |  |  |  |
|   |                                                                                                              |                                                                                                                                                                                                                                                                                                                                                                                                                                                 |                                                                                     |  |  |  |  |  |  |  |  |
|   |                                                                                                              |                                                                                                                                                                                                                                                                                                                                                                                                                                                 |                                                                                     |  |  |  |  |  |  |  |  |
| 5 | Payment or honoraria for lectures, presentations, speakers bureaus, manuscript writing or educational events | <input checked="" type="checkbox"/> None<br><table border="1" style="width: 100%; border-collapse: collapse;"> <tr><td style="width: 50%; height: 15px;"></td><td style="width: 50%; height: 15px;"></td></tr> <tr><td style="height: 15px;"></td><td style="height: 15px;"></td></tr> <tr><td style="height: 15px;"></td><td style="height: 15px;"></td></tr> </table>                                                                         |                                                                                     |  |  |  |  |  |  |  |  |
|   |                                                                                                              |                                                                                                                                                                                                                                                                                                                                                                                                                                                 |                                                                                     |  |  |  |  |  |  |  |  |
|   |                                                                                                              |                                                                                                                                                                                                                                                                                                                                                                                                                                                 |                                                                                     |  |  |  |  |  |  |  |  |
|   |                                                                                                              |                                                                                                                                                                                                                                                                                                                                                                                                                                                 |                                                                                     |  |  |  |  |  |  |  |  |
| 6 | Payment for expert testimony                                                                                 | <input checked="" type="checkbox"/> None<br><table border="1" style="width: 100%; border-collapse: collapse;"> <tr><td style="width: 50%; height: 15px;"></td><td style="width: 50%; height: 15px;"></td></tr> <tr><td style="height: 15px;"></td><td style="height: 15px;"></td></tr> <tr><td style="height: 15px;"></td><td style="height: 15px;"></td></tr> </table>                                                                         |                                                                                     |  |  |  |  |  |  |  |  |
|   |                                                                                                              |                                                                                                                                                                                                                                                                                                                                                                                                                                                 |                                                                                     |  |  |  |  |  |  |  |  |
|   |                                                                                                              |                                                                                                                                                                                                                                                                                                                                                                                                                                                 |                                                                                     |  |  |  |  |  |  |  |  |
|   |                                                                                                              |                                                                                                                                                                                                                                                                                                                                                                                                                                                 |                                                                                     |  |  |  |  |  |  |  |  |
| 7 | Support for attending meetings and/or travel                                                                 | <input checked="" type="checkbox"/> None<br><table border="1" style="width: 100%; border-collapse: collapse;"> <tr><td style="width: 50%; height: 15px;"></td><td style="width: 50%; height: 15px;"></td></tr> <tr><td style="height: 15px;"></td><td style="height: 15px;"></td></tr> <tr><td style="height: 15px;"></td><td style="height: 15px;"></td></tr> </table>                                                                         |                                                                                     |  |  |  |  |  |  |  |  |
|   |                                                                                                              |                                                                                                                                                                                                                                                                                                                                                                                                                                                 |                                                                                     |  |  |  |  |  |  |  |  |
|   |                                                                                                              |                                                                                                                                                                                                                                                                                                                                                                                                                                                 |                                                                                     |  |  |  |  |  |  |  |  |
|   |                                                                                                              |                                                                                                                                                                                                                                                                                                                                                                                                                                                 |                                                                                     |  |  |  |  |  |  |  |  |
| 8 | Patents planned, issued or pending                                                                           | <input checked="" type="checkbox"/> None<br><table border="1" style="width: 100%; border-collapse: collapse;"> <tr><td style="width: 50%; height: 15px;"></td><td style="width: 50%; height: 15px;"></td></tr> <tr><td style="height: 15px;"></td><td style="height: 15px;"></td></tr> <tr><td style="height: 15px;"></td><td style="height: 15px;"></td></tr> </table>                                                                         |                                                                                     |  |  |  |  |  |  |  |  |
|   |                                                                                                              |                                                                                                                                                                                                                                                                                                                                                                                                                                                 |                                                                                     |  |  |  |  |  |  |  |  |
|   |                                                                                                              |                                                                                                                                                                                                                                                                                                                                                                                                                                                 |                                                                                     |  |  |  |  |  |  |  |  |
|   |                                                                                                              |                                                                                                                                                                                                                                                                                                                                                                                                                                                 |                                                                                     |  |  |  |  |  |  |  |  |
| 9 | Participation on a Data Safety                                                                               | <input checked="" type="checkbox"/> None                                                                                                                                                                                                                                                                                                                                                                                                        |                                                                                     |  |  |  |  |  |  |  |  |

|           |                                                                                                   | Name all entities with whom you have this relationship or indicate none (add rows as needed) | Specifications/Comments (e.g., if payments were made to you or to your institution) |
|-----------|---------------------------------------------------------------------------------------------------|----------------------------------------------------------------------------------------------|-------------------------------------------------------------------------------------|
|           | Monitoring Board or Advisory Board                                                                | <input type="checkbox"/>                                                                     |                                                                                     |
|           |                                                                                                   | <input type="checkbox"/>                                                                     |                                                                                     |
|           |                                                                                                   | <input type="checkbox"/>                                                                     |                                                                                     |
| <b>10</b> | Leadership or fiduciary role in other board, society, committee or advocacy group, paid or unpaid | <input checked="" type="checkbox"/> <b>None</b>                                              |                                                                                     |
|           |                                                                                                   | <input type="checkbox"/>                                                                     |                                                                                     |
|           |                                                                                                   | <input type="checkbox"/>                                                                     |                                                                                     |
|           |                                                                                                   | <input type="checkbox"/>                                                                     |                                                                                     |
| <b>11</b> | Stock or stock options                                                                            | <input checked="" type="checkbox"/> <b>None</b>                                              |                                                                                     |
|           |                                                                                                   | <input type="checkbox"/>                                                                     |                                                                                     |
|           |                                                                                                   | <input type="checkbox"/>                                                                     |                                                                                     |
|           |                                                                                                   | <input type="checkbox"/>                                                                     |                                                                                     |
| <b>12</b> | Receipt of equipment, materials, drugs, medical writing, gifts or other services                  | <input checked="" type="checkbox"/> <b>None</b>                                              |                                                                                     |
|           |                                                                                                   | <input type="checkbox"/>                                                                     |                                                                                     |
|           |                                                                                                   | <input type="checkbox"/>                                                                     |                                                                                     |
|           |                                                                                                   | <input type="checkbox"/>                                                                     |                                                                                     |
| <b>13</b> | Other financial or non-financial interests                                                        | <input checked="" type="checkbox"/> <b>None</b>                                              |                                                                                     |
|           |                                                                                                   | <input type="checkbox"/>                                                                     |                                                                                     |
|           |                                                                                                   | <input type="checkbox"/>                                                                     |                                                                                     |
|           |                                                                                                   | <input type="checkbox"/>                                                                     |                                                                                     |

Please place an "X" next to the following statement to indicate your agreement:

I certify that I have answered every question and have not altered the wording of any of the questions on this form.

## ICMJE DISCLOSURE FORM

**Date:** 9/12/2023

**Your Name:** Armand González-Escalante

**Manuscript Title:** Genetic characterization of the ALFA study: Uncovering genetic profiles in the Alzheimer's continuum

**Manuscript Number (if known):** Click or tap here to enter text.

In the interest of transparency, we ask you to disclose all relationships/activities/interests listed below that are related to the content of your manuscript. "Related" means any relation with for-profit or not-for-profit third parties whose interests may be affected by the content of the manuscript. Disclosure represents a commitment to transparency and does not necessarily indicate a bias. If you are in doubt about whether to list a relationship/activity/interest, it is preferable that you do so.

The author's relationships/activities/interests should be defined broadly. For example, if your manuscript pertains to the epidemiology of hypertension, you should declare all relationships with manufacturers of antihypertensive medication, even if that medication is not mentioned in the manuscript.

In item #1 below, report all support for the work reported in this manuscript without time limit. For all other items, the time frame for disclosure is the past 36 months.

|                                                           |                                                                                                                                                                                | Name all entities with whom you have this relationship or indicate none (add rows as needed)                                                                                                                                                                                                                                                                                               | Specifications/Comments (e.g., if payments were made to you or to your institution) |
|-----------------------------------------------------------|--------------------------------------------------------------------------------------------------------------------------------------------------------------------------------|--------------------------------------------------------------------------------------------------------------------------------------------------------------------------------------------------------------------------------------------------------------------------------------------------------------------------------------------------------------------------------------------|-------------------------------------------------------------------------------------|
| <b>Time frame: Since the initial planning of the work</b> |                                                                                                                                                                                |                                                                                                                                                                                                                                                                                                                                                                                            |                                                                                     |
| <b>1</b>                                                  | All support for the present manuscript (e.g., funding, provision of study materials, medical writing, article processing charges, etc.)<br><b>No time limit for this item.</b> | <input type="checkbox"/> None                                                                                                                                                                                                                                                                                                                                                              |                                                                                     |
|                                                           |                                                                                                                                                                                | The project leading to these results has received funding from "la Caixa" Foundation (ID 100010434), under agreement LCF/PR/GN17/50300004                                                                                                                                                                                                                                                  |                                                                                     |
|                                                           |                                                                                                                                                                                | The project leading to these results has received funding from the Health Department of the Catalan Government (Health Research and Innovation Strategic Plan (PERIS) 2016-2020 grant# SLT002/16/00201). Additional support has been received from the Universities and Research Secretariat, Ministry of Business and Knowledge of the Catalan Government under grant no. 2021_SGR_00913. |                                                                                     |
|                                                           |                                                                                                                                                                                | The project leading to these results has received funding from the Alzheimer's Association (Grant AARG-19-618265).                                                                                                                                                                                                                                                                         | Click the tab key to add additional rows.                                           |
| <b>Time frame: past 36 months</b>                         |                                                                                                                                                                                |                                                                                                                                                                                                                                                                                                                                                                                            |                                                                                     |



|          |                                                                                                              | Name all entities with whom you have this relationship or indicate none (add rows as needed) | Specifications/Comments (e.g., if payments were made to you or to your institution) |
|----------|--------------------------------------------------------------------------------------------------------------|----------------------------------------------------------------------------------------------|-------------------------------------------------------------------------------------|
| <b>2</b> | Grants or contracts from any entity (if not indicated in item #1 above).                                     | <input checked="" type="checkbox"/> <b>None</b>                                              |                                                                                     |
|          |                                                                                                              |                                                                                              |                                                                                     |
|          |                                                                                                              |                                                                                              |                                                                                     |
| <b>3</b> | Royalties or licenses                                                                                        | <input checked="" type="checkbox"/> <b>None</b>                                              |                                                                                     |
|          |                                                                                                              |                                                                                              |                                                                                     |
|          |                                                                                                              |                                                                                              |                                                                                     |
| <b>4</b> | Consulting fees                                                                                              | <input checked="" type="checkbox"/> <b>None</b>                                              |                                                                                     |
|          |                                                                                                              |                                                                                              |                                                                                     |
|          |                                                                                                              |                                                                                              |                                                                                     |
| <b>5</b> | Payment or honoraria for lectures, presentations, speakers bureaus, manuscript writing or educational events | <input checked="" type="checkbox"/> <b>None</b>                                              |                                                                                     |
|          |                                                                                                              |                                                                                              |                                                                                     |
|          |                                                                                                              |                                                                                              |                                                                                     |
| <b>6</b> | Payment for expert testimony                                                                                 | <input checked="" type="checkbox"/> <b>None</b>                                              |                                                                                     |
|          |                                                                                                              |                                                                                              |                                                                                     |
|          |                                                                                                              |                                                                                              |                                                                                     |
| <b>7</b> | Support for attending meetings and/or travel                                                                 | <input checked="" type="checkbox"/> <b>None</b>                                              |                                                                                     |
|          |                                                                                                              |                                                                                              |                                                                                     |
|          |                                                                                                              |                                                                                              |                                                                                     |
| <b>8</b> | Patents planned, issued or pending                                                                           | <input checked="" type="checkbox"/> <b>None</b>                                              |                                                                                     |
|          |                                                                                                              |                                                                                              |                                                                                     |
|          |                                                                                                              |                                                                                              |                                                                                     |
| <b>9</b> | Participation on a Data Safety                                                                               | <input checked="" type="checkbox"/> <b>None</b>                                              |                                                                                     |

|           |                                                                                                   | Name all entities with whom you have this relationship or indicate none (add rows as needed) | Specifications/Comments (e.g., if payments were made to you or to your institution) |
|-----------|---------------------------------------------------------------------------------------------------|----------------------------------------------------------------------------------------------|-------------------------------------------------------------------------------------|
|           | Monitoring Board or Advisory Board                                                                | <input type="checkbox"/>                                                                     |                                                                                     |
|           |                                                                                                   | <input type="checkbox"/>                                                                     |                                                                                     |
|           |                                                                                                   | <input type="checkbox"/>                                                                     |                                                                                     |
| <b>10</b> | Leadership or fiduciary role in other board, society, committee or advocacy group, paid or unpaid | <input checked="" type="checkbox"/> <b>None</b>                                              |                                                                                     |
|           |                                                                                                   | <input type="checkbox"/>                                                                     |                                                                                     |
|           |                                                                                                   | <input type="checkbox"/>                                                                     |                                                                                     |
|           |                                                                                                   | <input type="checkbox"/>                                                                     |                                                                                     |
| <b>11</b> | Stock or stock options                                                                            | <input checked="" type="checkbox"/> <b>None</b>                                              |                                                                                     |
|           |                                                                                                   | <input type="checkbox"/>                                                                     |                                                                                     |
|           |                                                                                                   | <input type="checkbox"/>                                                                     |                                                                                     |
|           |                                                                                                   | <input type="checkbox"/>                                                                     |                                                                                     |
| <b>12</b> | Receipt of equipment, materials, drugs, medical writing, gifts or other services                  | <input checked="" type="checkbox"/> <b>None</b>                                              |                                                                                     |
|           |                                                                                                   | <input type="checkbox"/>                                                                     |                                                                                     |
|           |                                                                                                   | <input type="checkbox"/>                                                                     |                                                                                     |
|           |                                                                                                   | <input type="checkbox"/>                                                                     |                                                                                     |
| <b>13</b> | Other financial or non-financial interests                                                        | <input checked="" type="checkbox"/> <b>None</b>                                              |                                                                                     |
|           |                                                                                                   | <input type="checkbox"/>                                                                     |                                                                                     |
|           |                                                                                                   | <input type="checkbox"/>                                                                     |                                                                                     |
|           |                                                                                                   | <input type="checkbox"/>                                                                     |                                                                                     |

Please place an "X" next to the following statement to indicate your agreement:

I certify that I have answered every question and have not altered the wording of any of the questions on this form.

## ICMJE DISCLOSURE FORM

**Date:** 9/12/2023

**Your Name:** Marta Crous-Bou

**Manuscript Title:** Genetic characterization of the ALFA study: Uncovering genetic profiles in the Alzheimer's continuum

**Manuscript Number (if known):** Click or tap here to enter text.

In the interest of transparency, we ask you to disclose all relationships/activities/interests listed below that are related to the content of your manuscript. "Related" means any relation with for-profit or not-for-profit third parties whose interests may be affected by the content of the manuscript. Disclosure represents a commitment to transparency and does not necessarily indicate a bias. If you are in doubt about whether to list a relationship/activity/interest, it is preferable that you do so.

The author's relationships/activities/interests should be defined broadly. For example, if your manuscript pertains to the epidemiology of hypertension, you should declare all relationships with manufacturers of antihypertensive medication, even if that medication is not mentioned in the manuscript.

In item #1 below, report all support for the work reported in this manuscript without time limit. For all other items, the time frame for disclosure is the past 36 months.

|                                                           |                                                                                                                                                                                | Name all entities with whom you have this relationship or indicate none (add rows as needed)                                                                                                                                                                                                                                                                                               | Specifications/Comments (e.g., if payments were made to you or to your institution) |
|-----------------------------------------------------------|--------------------------------------------------------------------------------------------------------------------------------------------------------------------------------|--------------------------------------------------------------------------------------------------------------------------------------------------------------------------------------------------------------------------------------------------------------------------------------------------------------------------------------------------------------------------------------------|-------------------------------------------------------------------------------------|
| <b>Time frame: Since the initial planning of the work</b> |                                                                                                                                                                                |                                                                                                                                                                                                                                                                                                                                                                                            |                                                                                     |
| <b>1</b>                                                  | All support for the present manuscript (e.g., funding, provision of study materials, medical writing, article processing charges, etc.)<br><b>No time limit for this item.</b> | <input type="checkbox"/> None                                                                                                                                                                                                                                                                                                                                                              |                                                                                     |
|                                                           |                                                                                                                                                                                | The project leading to these results has received funding from "la Caixa" Foundation (ID 100010434), under agreement LCF/PR/GN17/50300004                                                                                                                                                                                                                                                  |                                                                                     |
|                                                           |                                                                                                                                                                                | The project leading to these results has received funding from the Health Department of the Catalan Government (Health Research and Innovation Strategic Plan (PERIS) 2016-2020 grant# SLT002/16/00201). Additional support has been received from the Universities and Research Secretariat, Ministry of Business and Knowledge of the Catalan Government under grant no. 2021_SGR_00913. |                                                                                     |
|                                                           |                                                                                                                                                                                | The project leading to these results has received funding from the Alzheimer's Association (Grant AARG-19-618265).                                                                                                                                                                                                                                                                         | Click the tab key to add additional rows.                                           |
| <b>Time frame: past 36 months</b>                         |                                                                                                                                                                                |                                                                                                                                                                                                                                                                                                                                                                                            |                                                                                     |

|   |                                                                                                              | Name all entities with whom you have this relationship or indicate none (add rows as needed) | Specifications/Comments (e.g., if payments were made to you or to your institution) |
|---|--------------------------------------------------------------------------------------------------------------|----------------------------------------------------------------------------------------------|-------------------------------------------------------------------------------------|
| 2 | Grants or contracts from any entity (if not indicated in item #1 above).                                     | <input checked="" type="checkbox"/> None                                                     |                                                                                     |
|   |                                                                                                              |                                                                                              |                                                                                     |
|   |                                                                                                              |                                                                                              |                                                                                     |
| 3 | Royalties or licenses                                                                                        | <input checked="" type="checkbox"/> None                                                     |                                                                                     |
|   |                                                                                                              |                                                                                              |                                                                                     |
|   |                                                                                                              |                                                                                              |                                                                                     |
| 4 | Consulting fees                                                                                              | <input checked="" type="checkbox"/> None                                                     |                                                                                     |
|   |                                                                                                              |                                                                                              |                                                                                     |
|   |                                                                                                              |                                                                                              |                                                                                     |
| 5 | Payment or honoraria for lectures, presentations, speakers bureaus, manuscript writing or educational events | <input checked="" type="checkbox"/> None                                                     |                                                                                     |
|   |                                                                                                              |                                                                                              |                                                                                     |
|   |                                                                                                              |                                                                                              |                                                                                     |
| 6 | Payment for expert testimony                                                                                 | <input checked="" type="checkbox"/> None                                                     |                                                                                     |
|   |                                                                                                              |                                                                                              |                                                                                     |
|   |                                                                                                              |                                                                                              |                                                                                     |
| 7 | Support for attending meetings and/or travel                                                                 | <input checked="" type="checkbox"/> None                                                     |                                                                                     |
|   |                                                                                                              |                                                                                              |                                                                                     |
|   |                                                                                                              |                                                                                              |                                                                                     |
| 8 | Patents planned, issued or pending                                                                           | <input checked="" type="checkbox"/> None                                                     |                                                                                     |
|   |                                                                                                              |                                                                                              |                                                                                     |
|   |                                                                                                              |                                                                                              |                                                                                     |
| 9 | Participation on a Data Safety                                                                               | <input checked="" type="checkbox"/> None                                                     |                                                                                     |

|           |                                                                                                   | Name all entities with whom you have this relationship or indicate none (add rows as needed) | Specifications/Comments (e.g., if payments were made to you or to your institution) |
|-----------|---------------------------------------------------------------------------------------------------|----------------------------------------------------------------------------------------------|-------------------------------------------------------------------------------------|
|           | Monitoring Board or Advisory Board                                                                | <input type="checkbox"/>                                                                     |                                                                                     |
|           |                                                                                                   | <input type="checkbox"/>                                                                     |                                                                                     |
|           |                                                                                                   | <input type="checkbox"/>                                                                     |                                                                                     |
| <b>10</b> | Leadership or fiduciary role in other board, society, committee or advocacy group, paid or unpaid | <input checked="" type="checkbox"/> <b>None</b>                                              |                                                                                     |
|           |                                                                                                   | <input type="checkbox"/>                                                                     |                                                                                     |
|           |                                                                                                   | <input type="checkbox"/>                                                                     |                                                                                     |
|           |                                                                                                   | <input type="checkbox"/>                                                                     |                                                                                     |
| <b>11</b> | Stock or stock options                                                                            | <input checked="" type="checkbox"/> <b>None</b>                                              |                                                                                     |
|           |                                                                                                   | <input type="checkbox"/>                                                                     |                                                                                     |
|           |                                                                                                   | <input type="checkbox"/>                                                                     |                                                                                     |
|           |                                                                                                   | <input type="checkbox"/>                                                                     |                                                                                     |
| <b>12</b> | Receipt of equipment, materials, drugs, medical writing, gifts or other services                  | <input checked="" type="checkbox"/> <b>None</b>                                              |                                                                                     |
|           |                                                                                                   | <input type="checkbox"/>                                                                     |                                                                                     |
|           |                                                                                                   | <input type="checkbox"/>                                                                     |                                                                                     |
|           |                                                                                                   | <input type="checkbox"/>                                                                     |                                                                                     |
| <b>13</b> | Other financial or non-financial interests                                                        | <input checked="" type="checkbox"/> <b>None</b>                                              |                                                                                     |
|           |                                                                                                   | <input type="checkbox"/>                                                                     |                                                                                     |
|           |                                                                                                   | <input type="checkbox"/>                                                                     |                                                                                     |
|           |                                                                                                   | <input type="checkbox"/>                                                                     |                                                                                     |

Please place an "X" next to the following statement to indicate your agreement:

I certify that I have answered every question and have not altered the wording of any of the questions on this form.

## ICMJE DISCLOSURE FORM

**Date:** 9/12/2023

**Your Name:** Marc Suárez-Calvet

**Manuscript Title:** Genetic characterization of the ALFA study: Uncovering genetic profiles in the Alzheimer's continuum

**Manuscript Number (if known):** [Click or tap here to enter text.](#)

In the interest of transparency, we ask you to disclose all relationships/activities/interests listed below that are related to the content of your manuscript. "Related" means any relation with for-profit or not-for-profit third parties whose interests may be affected by the content of the manuscript. Disclosure represents a commitment to transparency and does not necessarily indicate a bias. If you are in doubt about whether to list a relationship/activity/interest, it is preferable that you do so.

The author's relationships/activities/interests should be defined broadly. For example, if your manuscript pertains to the epidemiology of hypertension, you should declare all relationships with manufacturers of antihypertensive medication, even if that medication is not mentioned in the manuscript.

In item #1 below, report all support for the work reported in this manuscript without time limit. For all other items, the time frame for disclosure is the past 36 months.

|                                                           |                                                                                                                                                                                | Name all entities with whom you have this relationship or indicate none (add rows as needed)                                                                                                                                                                                                                                                                                               | Specifications/Comments (e.g., if payments were made to you or to your institution) |
|-----------------------------------------------------------|--------------------------------------------------------------------------------------------------------------------------------------------------------------------------------|--------------------------------------------------------------------------------------------------------------------------------------------------------------------------------------------------------------------------------------------------------------------------------------------------------------------------------------------------------------------------------------------|-------------------------------------------------------------------------------------|
| <b>Time frame: Since the initial planning of the work</b> |                                                                                                                                                                                |                                                                                                                                                                                                                                                                                                                                                                                            |                                                                                     |
| <b>1</b>                                                  | All support for the present manuscript (e.g., funding, provision of study materials, medical writing, article processing charges, etc.)<br><b>No time limit for this item.</b> | <input type="checkbox"/> None                                                                                                                                                                                                                                                                                                                                                              |                                                                                     |
|                                                           |                                                                                                                                                                                | The project leading to these results has received funding from "la Caixa" Foundation (ID 100010434), under agreement LCF/PR/GN17/50300004                                                                                                                                                                                                                                                  |                                                                                     |
|                                                           |                                                                                                                                                                                | The project leading to these results has received funding from the Health Department of the Catalan Government (Health Research and Innovation Strategic Plan (PERIS) 2016-2020 grant# SLT002/16/00201). Additional support has been received from the Universities and Research Secretariat, Ministry of Business and Knowledge of the Catalan Government under grant no. 2021_SGR_00913. |                                                                                     |
|                                                           |                                                                                                                                                                                | The project leading to these results has received funding from the Alzheimer's Association (Grant AARG-19-618265).                                                                                                                                                                                                                                                                         | <a href="#">Click the tab key to add additional rows.</a>                           |
| <b>Time frame: past 36 months</b>                         |                                                                                                                                                                                |                                                                                                                                                                                                                                                                                                                                                                                            |                                                                                     |

|   |                                                                                                              | Name all entities with whom you have this relationship or indicate none (add rows as needed)                                                                                                                                                       | Specifications/Comments (e.g., if payments were made to you or to your institution) |
|---|--------------------------------------------------------------------------------------------------------------|----------------------------------------------------------------------------------------------------------------------------------------------------------------------------------------------------------------------------------------------------|-------------------------------------------------------------------------------------|
| 2 | Grants or contracts from any entity (if not indicated in item #1 above).                                     | <input type="checkbox"/> None                                                                                                                                                                                                                      |                                                                                     |
|   |                                                                                                              | MS-C receives the support of a fellowship from "la Caixa" Foundation (ID 100010434). MS-C receives the support from the European Union's Horizon 2020 research and innovation programme under the Marie Skłodowska-Curie grant agreement No 847648 |                                                                                     |
| 3 | Royalties or licenses                                                                                        | <input checked="" type="checkbox"/> None                                                                                                                                                                                                           |                                                                                     |
|   |                                                                                                              |                                                                                                                                                                                                                                                    |                                                                                     |
| 4 | Consulting fees                                                                                              | <input checked="" type="checkbox"/> None                                                                                                                                                                                                           |                                                                                     |
|   |                                                                                                              |                                                                                                                                                                                                                                                    |                                                                                     |
| 5 | Payment or honoraria for lectures, presentations, speakers bureaus, manuscript writing or educational events | <input checked="" type="checkbox"/> None                                                                                                                                                                                                           |                                                                                     |
|   |                                                                                                              |                                                                                                                                                                                                                                                    |                                                                                     |
| 6 | Payment for expert testimony                                                                                 | <input checked="" type="checkbox"/> None                                                                                                                                                                                                           |                                                                                     |
|   |                                                                                                              |                                                                                                                                                                                                                                                    |                                                                                     |
| 7 | Support for attending meetings and/or travel                                                                 | <input checked="" type="checkbox"/> None                                                                                                                                                                                                           |                                                                                     |
|   |                                                                                                              |                                                                                                                                                                                                                                                    |                                                                                     |

|           |                                                                                                   | Name all entities with whom you have this relationship or indicate none (add rows as needed) | Specifications/Comments (e.g., if payments were made to you or to your institution) |
|-----------|---------------------------------------------------------------------------------------------------|----------------------------------------------------------------------------------------------|-------------------------------------------------------------------------------------|
| <b>8</b>  | Patents planned, issued or pending                                                                | <input checked="" type="checkbox"/> <b>None</b>                                              |                                                                                     |
|           |                                                                                                   |                                                                                              |                                                                                     |
|           |                                                                                                   |                                                                                              |                                                                                     |
| <b>9</b>  | Participation on a Data Safety Monitoring Board or Advisory Board                                 | <input checked="" type="checkbox"/> <b>None</b>                                              |                                                                                     |
|           |                                                                                                   |                                                                                              |                                                                                     |
|           |                                                                                                   |                                                                                              |                                                                                     |
| <b>10</b> | Leadership or fiduciary role in other board, society, committee or advocacy group, paid or unpaid | <input checked="" type="checkbox"/> <b>None</b>                                              |                                                                                     |
|           |                                                                                                   |                                                                                              |                                                                                     |
|           |                                                                                                   |                                                                                              |                                                                                     |
| <b>11</b> | Stock or stock options                                                                            | <input checked="" type="checkbox"/> <b>None</b>                                              |                                                                                     |
|           |                                                                                                   |                                                                                              |                                                                                     |
|           |                                                                                                   |                                                                                              |                                                                                     |
| <b>12</b> | Receipt of equipment, materials, drugs, medical writing, gifts or other services                  | <input checked="" type="checkbox"/> <b>None</b>                                              |                                                                                     |
|           |                                                                                                   |                                                                                              |                                                                                     |
|           |                                                                                                   |                                                                                              |                                                                                     |
| <b>13</b> | Other financial or non-financial interests                                                        | <input checked="" type="checkbox"/> <b>None</b>                                              |                                                                                     |
|           |                                                                                                   |                                                                                              |                                                                                     |
|           |                                                                                                   |                                                                                              |                                                                                     |

Please place an "X" next to the following statement to indicate your agreement:

I certify that I have answered every question and have not altered the wording of any of the questions on this form.



## ICMJE DISCLOSURE FORM

**Date:** 9/12/2023

**Your Name:** Oriol Grau-Rivera

**Manuscript Title:** Genetic characterization of the ALFA study: Uncovering genetic profiles in the Alzheimer's continuum

**Manuscript Number (if known):** [Click or tap here to enter text.](#)

In the interest of transparency, we ask you to disclose all relationships/activities/interests listed below that are related to the content of your manuscript. "Related" means any relation with for-profit or not-for-profit third parties whose interests may be affected by the content of the manuscript. Disclosure represents a commitment to transparency and does not necessarily indicate a bias. If you are in doubt about whether to list a relationship/activity/interest, it is preferable that you do so.

The author's relationships/activities/interests should be defined broadly. For example, if your manuscript pertains to the epidemiology of hypertension, you should declare all relationships with manufacturers of antihypertensive medication, even if that medication is not mentioned in the manuscript.

In item #1 below, report all support for the work reported in this manuscript without time limit. For all other items, the time frame for disclosure is the past 36 months.

|                                                                                                                                                                                         |                                                                                                                                                                                                                                                                                                                                                                                            | Name all entities with whom you have this relationship or indicate none (add rows as needed) | Specifications/Comments (e.g., if payments were made to you or to your institution) |
|-----------------------------------------------------------------------------------------------------------------------------------------------------------------------------------------|--------------------------------------------------------------------------------------------------------------------------------------------------------------------------------------------------------------------------------------------------------------------------------------------------------------------------------------------------------------------------------------------|----------------------------------------------------------------------------------------------|-------------------------------------------------------------------------------------|
| <b>Time frame: Since the initial planning of the work</b>                                                                                                                               |                                                                                                                                                                                                                                                                                                                                                                                            |                                                                                              |                                                                                     |
| <b>1</b> All support for the present manuscript (e.g., funding, provision of study materials, medical writing, article processing charges, etc.)<br><b>No time limit for this item.</b> | <input type="checkbox"/> None                                                                                                                                                                                                                                                                                                                                                              |                                                                                              |                                                                                     |
|                                                                                                                                                                                         | The project leading to these results has received funding from "la Caixa" Foundation (ID 100010434), under agreement LCF/PR/GN17/50300004                                                                                                                                                                                                                                                  |                                                                                              |                                                                                     |
|                                                                                                                                                                                         | The project leading to these results has received funding from the Health Department of the Catalan Government (Health Research and Innovation Strategic Plan (PERIS) 2016-2020 grant# SLT002/16/00201). Additional support has been received from the Universities and Research Secretariat, Ministry of Business and Knowledge of the Catalan Government under grant no. 2021_SGR_00913. |                                                                                              |                                                                                     |
|                                                                                                                                                                                         | The project leading to these results has received funding from the Alzheimer's Association (Grant AARG-19-618265).                                                                                                                                                                                                                                                                         |                                                                                              | Click the tab key to add additional rows.                                           |
| <b>Time frame: past 36 months</b>                                                                                                                                                       |                                                                                                                                                                                                                                                                                                                                                                                            |                                                                                              |                                                                                     |

|   |                                                                                                              | Name all entities with whom you have this relationship or indicate none (add rows as needed)                                                                                                     | Specifications/Comments (e.g., if payments were made to you or to your institution) |
|---|--------------------------------------------------------------------------------------------------------------|--------------------------------------------------------------------------------------------------------------------------------------------------------------------------------------------------|-------------------------------------------------------------------------------------|
| 2 | Grants or contracts from any entity (if not indicated in item #1 above).                                     | <input type="checkbox"/> None                                                                                                                                                                    |                                                                                     |
|   |                                                                                                              | OG-R receive funding from the MCIN/AEI/10.13039/501100011033 and the European Union NextGenerationEU/PRTR, through the Juan de la Cierva Incorporación Programme (IJC2020-043417-I respectively) |                                                                                     |
| 3 | Royalties or licenses                                                                                        | <input checked="" type="checkbox"/> None                                                                                                                                                         |                                                                                     |
|   |                                                                                                              |                                                                                                                                                                                                  |                                                                                     |
| 4 | Consulting fees                                                                                              | <input checked="" type="checkbox"/> None                                                                                                                                                         |                                                                                     |
|   |                                                                                                              |                                                                                                                                                                                                  |                                                                                     |
| 5 | Payment or honoraria for lectures, presentations, speakers bureaus, manuscript writing or educational events | <input checked="" type="checkbox"/> None                                                                                                                                                         |                                                                                     |
|   |                                                                                                              |                                                                                                                                                                                                  |                                                                                     |
| 6 | Payment for expert testimony                                                                                 | <input checked="" type="checkbox"/> None                                                                                                                                                         |                                                                                     |
|   |                                                                                                              |                                                                                                                                                                                                  |                                                                                     |
| 7 | Support for attending meetings and/or travel                                                                 | <input checked="" type="checkbox"/> None                                                                                                                                                         |                                                                                     |
|   |                                                                                                              |                                                                                                                                                                                                  |                                                                                     |

|           |                                                                                                   | Name all entities with whom you have this relationship or indicate none (add rows as needed) | Specifications/Comments (e.g., if payments were made to you or to your institution) |
|-----------|---------------------------------------------------------------------------------------------------|----------------------------------------------------------------------------------------------|-------------------------------------------------------------------------------------|
| <b>8</b>  | Patents planned, issued or pending                                                                | <input checked="" type="checkbox"/> <b>None</b>                                              |                                                                                     |
|           |                                                                                                   |                                                                                              |                                                                                     |
|           |                                                                                                   |                                                                                              |                                                                                     |
| <b>9</b>  | Participation on a Data Safety Monitoring Board or Advisory Board                                 | <input checked="" type="checkbox"/> <b>None</b>                                              |                                                                                     |
|           |                                                                                                   |                                                                                              |                                                                                     |
|           |                                                                                                   |                                                                                              |                                                                                     |
| <b>10</b> | Leadership or fiduciary role in other board, society, committee or advocacy group, paid or unpaid | <input checked="" type="checkbox"/> <b>None</b>                                              |                                                                                     |
|           |                                                                                                   |                                                                                              |                                                                                     |
|           |                                                                                                   |                                                                                              |                                                                                     |
| <b>11</b> | Stock or stock options                                                                            | <input checked="" type="checkbox"/> <b>None</b>                                              |                                                                                     |
|           |                                                                                                   |                                                                                              |                                                                                     |
|           |                                                                                                   |                                                                                              |                                                                                     |
| <b>12</b> | Receipt of equipment, materials, drugs, medical writing, gifts or other services                  | <input checked="" type="checkbox"/> <b>None</b>                                              |                                                                                     |
|           |                                                                                                   |                                                                                              |                                                                                     |
|           |                                                                                                   |                                                                                              |                                                                                     |
| <b>13</b> | Other financial or non-financial interests                                                        | <input checked="" type="checkbox"/> <b>None</b>                                              |                                                                                     |
|           |                                                                                                   |                                                                                              |                                                                                     |
|           |                                                                                                   |                                                                                              |                                                                                     |

Please place an "X" next to the following statement to indicate your agreement:

I certify that I have answered every question and have not altered the wording of any of the questions on this form.

## ICMJE DISCLOSURE FORM

**Date:** 9/12/2023

**Your Name:** Anna Brugulat-Serrat

**Manuscript Title:** Genetic characterization of the ALFA study: Uncovering genetic profiles in the Alzheimer's continuum

**Manuscript Number (if known):** [Click or tap here to enter text.](#)

In the interest of transparency, we ask you to disclose all relationships/activities/interests listed below that are related to the content of your manuscript. "Related" means any relation with for-profit or not-for-profit third parties whose interests may be affected by the content of the manuscript. Disclosure represents a commitment to transparency and does not necessarily indicate a bias. If you are in doubt about whether to list a relationship/activity/interest, it is preferable that you do so.

The author's relationships/activities/interests should be defined broadly. For example, if your manuscript pertains to the epidemiology of hypertension, you should declare all relationships with manufacturers of antihypertensive medication, even if that medication is not mentioned in the manuscript.

In item #1 below, report all support for the work reported in this manuscript without time limit. For all other items, the time frame for disclosure is the past 36 months.

|                                                           |                                                                                                                                                                                | Name all entities with whom you have this relationship or indicate none (add rows as needed)                                                                                                                                                                                                                                                                                               | Specifications/Comments (e.g., if payments were made to you or to your institution) |
|-----------------------------------------------------------|--------------------------------------------------------------------------------------------------------------------------------------------------------------------------------|--------------------------------------------------------------------------------------------------------------------------------------------------------------------------------------------------------------------------------------------------------------------------------------------------------------------------------------------------------------------------------------------|-------------------------------------------------------------------------------------|
| <b>Time frame: Since the initial planning of the work</b> |                                                                                                                                                                                |                                                                                                                                                                                                                                                                                                                                                                                            |                                                                                     |
| <b>1</b>                                                  | All support for the present manuscript (e.g., funding, provision of study materials, medical writing, article processing charges, etc.)<br><b>No time limit for this item.</b> | <input type="checkbox"/> None                                                                                                                                                                                                                                                                                                                                                              |                                                                                     |
|                                                           |                                                                                                                                                                                | The project leading to these results has received funding from "la Caixa" Foundation (ID 100010434), under agreement LCF/PR/GN17/50300004                                                                                                                                                                                                                                                  |                                                                                     |
|                                                           |                                                                                                                                                                                | The project leading to these results has received funding from the Health Department of the Catalan Government (Health Research and Innovation Strategic Plan (PERIS) 2016-2020 grant# SLT002/16/00201). Additional support has been received from the Universities and Research Secretariat, Ministry of Business and Knowledge of the Catalan Government under grant no. 2021_SGR_00913. |                                                                                     |
|                                                           |                                                                                                                                                                                | The project leading to these results has received funding from the Alzheimer's Association (Grant AARG-19-618265).                                                                                                                                                                                                                                                                         | <a href="#">Click the tab key to add additional rows.</a>                           |
| <b>Time frame: past 36 months</b>                         |                                                                                                                                                                                |                                                                                                                                                                                                                                                                                                                                                                                            |                                                                                     |

|   |                                                                                                              | Name all entities with whom you have this relationship or indicate none (add rows as needed)                                                                                                                                                                                                                                                                                                                                                    | Specifications/Comments (e.g., if payments were made to you or to your institution) |  |  |  |  |  |  |  |  |
|---|--------------------------------------------------------------------------------------------------------------|-------------------------------------------------------------------------------------------------------------------------------------------------------------------------------------------------------------------------------------------------------------------------------------------------------------------------------------------------------------------------------------------------------------------------------------------------|-------------------------------------------------------------------------------------|--|--|--|--|--|--|--|--|
| 2 | Grants or contracts from any entity (if not indicated in item #1 above).                                     | <input checked="" type="checkbox"/> None<br><table border="1" style="width: 100%; border-collapse: collapse;"> <tr><td style="width: 50%; height: 20px;"></td><td style="width: 50%; height: 20px;"></td></tr> <tr><td style="height: 20px;"></td><td style="height: 20px;"></td></tr> <tr><td style="height: 20px;"></td><td style="height: 20px;"></td></tr> </table>                                                                         |                                                                                     |  |  |  |  |  |  |  |  |
|   |                                                                                                              |                                                                                                                                                                                                                                                                                                                                                                                                                                                 |                                                                                     |  |  |  |  |  |  |  |  |
|   |                                                                                                              |                                                                                                                                                                                                                                                                                                                                                                                                                                                 |                                                                                     |  |  |  |  |  |  |  |  |
|   |                                                                                                              |                                                                                                                                                                                                                                                                                                                                                                                                                                                 |                                                                                     |  |  |  |  |  |  |  |  |
| 3 | Royalties or licenses                                                                                        | <input checked="" type="checkbox"/> None<br><table border="1" style="width: 100%; border-collapse: collapse;"> <tr><td style="width: 50%; height: 20px;"></td><td style="width: 50%; height: 20px;"></td></tr> <tr><td style="height: 20px;"></td><td style="height: 20px;"></td></tr> <tr><td style="height: 20px;"></td><td style="height: 20px;"></td></tr> </table>                                                                         |                                                                                     |  |  |  |  |  |  |  |  |
|   |                                                                                                              |                                                                                                                                                                                                                                                                                                                                                                                                                                                 |                                                                                     |  |  |  |  |  |  |  |  |
|   |                                                                                                              |                                                                                                                                                                                                                                                                                                                                                                                                                                                 |                                                                                     |  |  |  |  |  |  |  |  |
|   |                                                                                                              |                                                                                                                                                                                                                                                                                                                                                                                                                                                 |                                                                                     |  |  |  |  |  |  |  |  |
| 4 | Consulting fees                                                                                              | <input checked="" type="checkbox"/> None<br><table border="1" style="width: 100%; border-collapse: collapse;"> <tr><td style="width: 50%; height: 20px;"></td><td style="width: 50%; height: 20px;"></td></tr> <tr><td style="height: 20px;"></td><td style="height: 20px;"></td></tr> <tr><td style="height: 20px;"></td><td style="height: 20px;"></td></tr> <tr><td style="height: 20px;"></td><td style="height: 20px;"></td></tr> </table> |                                                                                     |  |  |  |  |  |  |  |  |
|   |                                                                                                              |                                                                                                                                                                                                                                                                                                                                                                                                                                                 |                                                                                     |  |  |  |  |  |  |  |  |
|   |                                                                                                              |                                                                                                                                                                                                                                                                                                                                                                                                                                                 |                                                                                     |  |  |  |  |  |  |  |  |
|   |                                                                                                              |                                                                                                                                                                                                                                                                                                                                                                                                                                                 |                                                                                     |  |  |  |  |  |  |  |  |
|   |                                                                                                              |                                                                                                                                                                                                                                                                                                                                                                                                                                                 |                                                                                     |  |  |  |  |  |  |  |  |
| 5 | Payment or honoraria for lectures, presentations, speakers bureaus, manuscript writing or educational events | <input checked="" type="checkbox"/> None<br><table border="1" style="width: 100%; border-collapse: collapse;"> <tr><td style="width: 50%; height: 20px;"></td><td style="width: 50%; height: 20px;"></td></tr> <tr><td style="height: 20px;"></td><td style="height: 20px;"></td></tr> <tr><td style="height: 20px;"></td><td style="height: 20px;"></td></tr> </table>                                                                         |                                                                                     |  |  |  |  |  |  |  |  |
|   |                                                                                                              |                                                                                                                                                                                                                                                                                                                                                                                                                                                 |                                                                                     |  |  |  |  |  |  |  |  |
|   |                                                                                                              |                                                                                                                                                                                                                                                                                                                                                                                                                                                 |                                                                                     |  |  |  |  |  |  |  |  |
|   |                                                                                                              |                                                                                                                                                                                                                                                                                                                                                                                                                                                 |                                                                                     |  |  |  |  |  |  |  |  |
| 6 | Payment for expert testimony                                                                                 | <input checked="" type="checkbox"/> None<br><table border="1" style="width: 100%; border-collapse: collapse;"> <tr><td style="width: 50%; height: 20px;"></td><td style="width: 50%; height: 20px;"></td></tr> <tr><td style="height: 20px;"></td><td style="height: 20px;"></td></tr> <tr><td style="height: 20px;"></td><td style="height: 20px;"></td></tr> </table>                                                                         |                                                                                     |  |  |  |  |  |  |  |  |
|   |                                                                                                              |                                                                                                                                                                                                                                                                                                                                                                                                                                                 |                                                                                     |  |  |  |  |  |  |  |  |
|   |                                                                                                              |                                                                                                                                                                                                                                                                                                                                                                                                                                                 |                                                                                     |  |  |  |  |  |  |  |  |
|   |                                                                                                              |                                                                                                                                                                                                                                                                                                                                                                                                                                                 |                                                                                     |  |  |  |  |  |  |  |  |
| 7 | Support for attending meetings and/or travel                                                                 | <input checked="" type="checkbox"/> None<br><table border="1" style="width: 100%; border-collapse: collapse;"> <tr><td style="width: 50%; height: 20px;"></td><td style="width: 50%; height: 20px;"></td></tr> <tr><td style="height: 20px;"></td><td style="height: 20px;"></td></tr> <tr><td style="height: 20px;"></td><td style="height: 20px;"></td></tr> </table>                                                                         |                                                                                     |  |  |  |  |  |  |  |  |
|   |                                                                                                              |                                                                                                                                                                                                                                                                                                                                                                                                                                                 |                                                                                     |  |  |  |  |  |  |  |  |
|   |                                                                                                              |                                                                                                                                                                                                                                                                                                                                                                                                                                                 |                                                                                     |  |  |  |  |  |  |  |  |
|   |                                                                                                              |                                                                                                                                                                                                                                                                                                                                                                                                                                                 |                                                                                     |  |  |  |  |  |  |  |  |
| 8 | Patents planned, issued or pending                                                                           | <input checked="" type="checkbox"/> None<br><table border="1" style="width: 100%; border-collapse: collapse;"> <tr><td style="width: 50%; height: 20px;"></td><td style="width: 50%; height: 20px;"></td></tr> <tr><td style="height: 20px;"></td><td style="height: 20px;"></td></tr> <tr><td style="height: 20px;"></td><td style="height: 20px;"></td></tr> </table>                                                                         |                                                                                     |  |  |  |  |  |  |  |  |
|   |                                                                                                              |                                                                                                                                                                                                                                                                                                                                                                                                                                                 |                                                                                     |  |  |  |  |  |  |  |  |
|   |                                                                                                              |                                                                                                                                                                                                                                                                                                                                                                                                                                                 |                                                                                     |  |  |  |  |  |  |  |  |
|   |                                                                                                              |                                                                                                                                                                                                                                                                                                                                                                                                                                                 |                                                                                     |  |  |  |  |  |  |  |  |
| 9 | Participation on a Data Safety                                                                               | <input checked="" type="checkbox"/> None                                                                                                                                                                                                                                                                                                                                                                                                        |                                                                                     |  |  |  |  |  |  |  |  |

|           |                                                                                                   | Name all entities with whom you have this relationship or indicate none (add rows as needed) | Specifications/Comments (e.g., if payments were made to you or to your institution) |
|-----------|---------------------------------------------------------------------------------------------------|----------------------------------------------------------------------------------------------|-------------------------------------------------------------------------------------|
|           | Monitoring Board or Advisory Board                                                                | <input type="checkbox"/>                                                                     |                                                                                     |
|           |                                                                                                   | <input type="checkbox"/>                                                                     |                                                                                     |
|           |                                                                                                   | <input type="checkbox"/>                                                                     |                                                                                     |
| <b>10</b> | Leadership or fiduciary role in other board, society, committee or advocacy group, paid or unpaid | <input checked="" type="checkbox"/> <b>None</b>                                              |                                                                                     |
|           |                                                                                                   | <input type="checkbox"/>                                                                     |                                                                                     |
|           |                                                                                                   | <input type="checkbox"/>                                                                     |                                                                                     |
|           |                                                                                                   | <input type="checkbox"/>                                                                     |                                                                                     |
| <b>11</b> | Stock or stock options                                                                            | <input checked="" type="checkbox"/> <b>None</b>                                              |                                                                                     |
|           |                                                                                                   | <input type="checkbox"/>                                                                     |                                                                                     |
|           |                                                                                                   | <input type="checkbox"/>                                                                     |                                                                                     |
|           |                                                                                                   | <input type="checkbox"/>                                                                     |                                                                                     |
| <b>12</b> | Receipt of equipment, materials, drugs, medical writing, gifts or other services                  | <input checked="" type="checkbox"/> <b>None</b>                                              |                                                                                     |
|           |                                                                                                   | <input type="checkbox"/>                                                                     |                                                                                     |
|           |                                                                                                   | <input type="checkbox"/>                                                                     |                                                                                     |
|           |                                                                                                   | <input type="checkbox"/>                                                                     |                                                                                     |
| <b>13</b> | Other financial or non-financial interests                                                        | <input checked="" type="checkbox"/> <b>None</b>                                              |                                                                                     |
|           |                                                                                                   | <input type="checkbox"/>                                                                     |                                                                                     |
|           |                                                                                                   | <input type="checkbox"/>                                                                     |                                                                                     |
|           |                                                                                                   | <input type="checkbox"/>                                                                     |                                                                                     |

Please place an "X" next to the following statement to indicate your agreement:

I certify that I have answered every question and have not altered the wording of any of the questions on this form.

## ICMJE DISCLOSURE FORM

**Date:** 9/12/2023

**Your Name:** Gonzalo Sanchez-Benavides

**Manuscript Title:** Genetic characterization of the ALFA study: Uncovering genetic profiles in the Alzheimer's continuum

**Manuscript Number (if known):** [Click or tap here to enter text.](#)

In the interest of transparency, we ask you to disclose all relationships/activities/interests listed below that are related to the content of your manuscript. "Related" means any relation with for-profit or not-for-profit third parties whose interests may be affected by the content of the manuscript. Disclosure represents a commitment to transparency and does not necessarily indicate a bias. If you are in doubt about whether to list a relationship/activity/interest, it is preferable that you do so.

The author's relationships/activities/interests should be defined broadly. For example, if your manuscript pertains to the epidemiology of hypertension, you should declare all relationships with manufacturers of antihypertensive medication, even if that medication is not mentioned in the manuscript.

In item #1 below, report all support for the work reported in this manuscript without time limit. For all other items, the time frame for disclosure is the past 36 months.

|                                                           |                                                                                                                                                                                | Name all entities with whom you have this relationship or indicate none (add rows as needed)                                                                                                                                                                                                                                                                                               | Specifications/Comments (e.g., if payments were made to you or to your institution) |
|-----------------------------------------------------------|--------------------------------------------------------------------------------------------------------------------------------------------------------------------------------|--------------------------------------------------------------------------------------------------------------------------------------------------------------------------------------------------------------------------------------------------------------------------------------------------------------------------------------------------------------------------------------------|-------------------------------------------------------------------------------------|
| <b>Time frame: Since the initial planning of the work</b> |                                                                                                                                                                                |                                                                                                                                                                                                                                                                                                                                                                                            |                                                                                     |
| <b>1</b>                                                  | All support for the present manuscript (e.g., funding, provision of study materials, medical writing, article processing charges, etc.)<br><b>No time limit for this item.</b> | <input type="checkbox"/> None                                                                                                                                                                                                                                                                                                                                                              |                                                                                     |
|                                                           |                                                                                                                                                                                | The project leading to these results has received funding from "la Caixa" Foundation (ID 100010434), under agreement LCF/PR/GN17/50300004                                                                                                                                                                                                                                                  |                                                                                     |
|                                                           |                                                                                                                                                                                | The project leading to these results has received funding from the Health Department of the Catalan Government (Health Research and Innovation Strategic Plan (PERIS) 2016-2020 grant# SLT002/16/00201). Additional support has been received from the Universities and Research Secretariat, Ministry of Business and Knowledge of the Catalan Government under grant no. 2021_SGR_00913. |                                                                                     |
|                                                           |                                                                                                                                                                                | The project leading to these results has received funding from the Alzheimer's Association (Grant AARG-19-618265).                                                                                                                                                                                                                                                                         | <a href="#">Click the tab key to add additional rows.</a>                           |
| <b>Time frame: past 36 months</b>                         |                                                                                                                                                                                |                                                                                                                                                                                                                                                                                                                                                                                            |                                                                                     |

|   |                                                                                                              | Name all entities with whom you have this relationship or indicate none (add rows as needed) | Specifications/Comments (e.g., if payments were made to you or to your institution) |
|---|--------------------------------------------------------------------------------------------------------------|----------------------------------------------------------------------------------------------|-------------------------------------------------------------------------------------|
| 2 | Grants or contracts from any entity (if not indicated in item #1 above).                                     | <input checked="" type="checkbox"/> None                                                     |                                                                                     |
|   |                                                                                                              |                                                                                              |                                                                                     |
|   |                                                                                                              |                                                                                              |                                                                                     |
| 3 | Royalties or licenses                                                                                        | <input checked="" type="checkbox"/> None                                                     |                                                                                     |
|   |                                                                                                              |                                                                                              |                                                                                     |
|   |                                                                                                              |                                                                                              |                                                                                     |
| 4 | Consulting fees                                                                                              | <input checked="" type="checkbox"/> None                                                     |                                                                                     |
|   |                                                                                                              |                                                                                              |                                                                                     |
|   |                                                                                                              |                                                                                              |                                                                                     |
| 5 | Payment or honoraria for lectures, presentations, speakers bureaus, manuscript writing or educational events | <input checked="" type="checkbox"/> None                                                     |                                                                                     |
|   |                                                                                                              |                                                                                              |                                                                                     |
|   |                                                                                                              |                                                                                              |                                                                                     |
| 6 | Payment for expert testimony                                                                                 | <input checked="" type="checkbox"/> None                                                     |                                                                                     |
|   |                                                                                                              |                                                                                              |                                                                                     |
|   |                                                                                                              |                                                                                              |                                                                                     |
| 7 | Support for attending meetings and/or travel                                                                 | <input checked="" type="checkbox"/> None                                                     |                                                                                     |
|   |                                                                                                              |                                                                                              |                                                                                     |
|   |                                                                                                              |                                                                                              |                                                                                     |
| 8 | Patents planned, issued or pending                                                                           | <input checked="" type="checkbox"/> None                                                     |                                                                                     |
|   |                                                                                                              |                                                                                              |                                                                                     |
|   |                                                                                                              |                                                                                              |                                                                                     |
| 9 | Participation on a Data Safety                                                                               | <input checked="" type="checkbox"/> None                                                     |                                                                                     |



|           |                                                                                                   | Name all entities with whom you have this relationship or indicate none (add rows as needed) | Specifications/Comments (e.g., if payments were made to you or to your institution) |
|-----------|---------------------------------------------------------------------------------------------------|----------------------------------------------------------------------------------------------|-------------------------------------------------------------------------------------|
|           | Monitoring Board or Advisory Board                                                                | <input type="checkbox"/>                                                                     |                                                                                     |
|           |                                                                                                   | <input type="checkbox"/>                                                                     |                                                                                     |
|           |                                                                                                   | <input type="checkbox"/>                                                                     |                                                                                     |
| <b>10</b> | Leadership or fiduciary role in other board, society, committee or advocacy group, paid or unpaid | <input checked="" type="checkbox"/> <b>None</b>                                              |                                                                                     |
|           |                                                                                                   | <input type="checkbox"/>                                                                     |                                                                                     |
|           |                                                                                                   | <input type="checkbox"/>                                                                     |                                                                                     |
|           |                                                                                                   | <input type="checkbox"/>                                                                     |                                                                                     |
| <b>11</b> | Stock or stock options                                                                            | <input checked="" type="checkbox"/> <b>None</b>                                              |                                                                                     |
|           |                                                                                                   | <input type="checkbox"/>                                                                     |                                                                                     |
|           |                                                                                                   | <input type="checkbox"/>                                                                     |                                                                                     |
|           |                                                                                                   | <input type="checkbox"/>                                                                     |                                                                                     |
| <b>12</b> | Receipt of equipment, materials, drugs, medical writing, gifts or other services                  | <input checked="" type="checkbox"/> <b>None</b>                                              |                                                                                     |
|           |                                                                                                   | <input type="checkbox"/>                                                                     |                                                                                     |
|           |                                                                                                   | <input type="checkbox"/>                                                                     |                                                                                     |
|           |                                                                                                   | <input type="checkbox"/>                                                                     |                                                                                     |
| <b>13</b> | Other financial or non-financial interests                                                        | <input checked="" type="checkbox"/> <b>None</b>                                              |                                                                                     |
|           |                                                                                                   | <input type="checkbox"/>                                                                     |                                                                                     |
|           |                                                                                                   | <input type="checkbox"/>                                                                     |                                                                                     |
|           |                                                                                                   | <input type="checkbox"/>                                                                     |                                                                                     |

Please place an "X" next to the following statement to indicate your agreement:

I certify that I have answered every question and have not altered the wording of any of the questions on this form.

## ICMJE DISCLOSURE FORM

**Date:** 9/12/2023

**Your Name:** Manel Esteller

**Manuscript Title:** Genetic characterization of the ALFA study: Uncovering genetic profiles in the Alzheimer's continuum

**Manuscript Number (if known):** [Click or tap here to enter text.](#)

In the interest of transparency, we ask you to disclose all relationships/activities/interests listed below that are related to the content of your manuscript. "Related" means any relation with for-profit or not-for-profit third parties whose interests may be affected by the content of the manuscript. Disclosure represents a commitment to transparency and does not necessarily indicate a bias. If you are in doubt about whether to list a relationship/activity/interest, it is preferable that you do so.

The author's relationships/activities/interests should be defined broadly. For example, if your manuscript pertains to the epidemiology of hypertension, you should declare all relationships with manufacturers of antihypertensive medication, even if that medication is not mentioned in the manuscript.

In item #1 below, report all support for the work reported in this manuscript without time limit. For all other items, the time frame for disclosure is the past 36 months.

|                                                           |                                                                                                                                                                                | Name all entities with whom you have this relationship or indicate none (add rows as needed)                                                                                                                                                                                                                                                                                               | Specifications/Comments (e.g., if payments were made to you or to your institution) |
|-----------------------------------------------------------|--------------------------------------------------------------------------------------------------------------------------------------------------------------------------------|--------------------------------------------------------------------------------------------------------------------------------------------------------------------------------------------------------------------------------------------------------------------------------------------------------------------------------------------------------------------------------------------|-------------------------------------------------------------------------------------|
| <b>Time frame: Since the initial planning of the work</b> |                                                                                                                                                                                |                                                                                                                                                                                                                                                                                                                                                                                            |                                                                                     |
| <b>1</b>                                                  | All support for the present manuscript (e.g., funding, provision of study materials, medical writing, article processing charges, etc.)<br><b>No time limit for this item.</b> | <input type="checkbox"/> None                                                                                                                                                                                                                                                                                                                                                              |                                                                                     |
|                                                           |                                                                                                                                                                                | The project leading to these results has received funding from "la Caixa" Foundation (ID 100010434), under agreement LCF/PR/GN17/50300004                                                                                                                                                                                                                                                  |                                                                                     |
|                                                           |                                                                                                                                                                                | The project leading to these results has received funding from the Health Department of the Catalan Government (Health Research and Innovation Strategic Plan (PERIS) 2016-2020 grant# SLT002/16/00201). Additional support has been received from the Universities and Research Secretariat, Ministry of Business and Knowledge of the Catalan Government under grant no. 2021_SGR_00913. |                                                                                     |
|                                                           |                                                                                                                                                                                | The project leading to these results has received funding from the Alzheimer's Association (Grant AARG-19-618265).                                                                                                                                                                                                                                                                         | <small>Click the tab key to add additional rows.</small>                            |
| <b>Time frame: past 36 months</b>                         |                                                                                                                                                                                |                                                                                                                                                                                                                                                                                                                                                                                            |                                                                                     |

|          |                                                                                                              | Name all entities with whom you have this relationship or indicate none (add rows as needed) | Specifications/Comments (e.g., if payments were made to you or to your institution) |
|----------|--------------------------------------------------------------------------------------------------------------|----------------------------------------------------------------------------------------------|-------------------------------------------------------------------------------------|
| <b>2</b> | Grants or contracts from any entity (if not indicated in item #1 above).                                     | <input checked="" type="checkbox"/> <b>None</b>                                              |                                                                                     |
|          |                                                                                                              |                                                                                              |                                                                                     |
|          |                                                                                                              |                                                                                              |                                                                                     |
| <b>3</b> | Royalties or licenses                                                                                        | <input checked="" type="checkbox"/> <b>None</b>                                              |                                                                                     |
|          |                                                                                                              |                                                                                              |                                                                                     |
|          |                                                                                                              |                                                                                              |                                                                                     |
| <b>4</b> | Consulting fees                                                                                              | <input checked="" type="checkbox"/> <b>None</b>                                              |                                                                                     |
|          |                                                                                                              |                                                                                              |                                                                                     |
|          |                                                                                                              |                                                                                              |                                                                                     |
| <b>5</b> | Payment or honoraria for lectures, presentations, speakers bureaus, manuscript writing or educational events | <input checked="" type="checkbox"/> <b>None</b>                                              |                                                                                     |
|          |                                                                                                              |                                                                                              |                                                                                     |
|          |                                                                                                              |                                                                                              |                                                                                     |
| <b>6</b> | Payment for expert testimony                                                                                 | <input checked="" type="checkbox"/> <b>None</b>                                              |                                                                                     |
|          |                                                                                                              |                                                                                              |                                                                                     |
|          |                                                                                                              |                                                                                              |                                                                                     |
| <b>7</b> | Support for attending meetings and/or travel                                                                 | <input checked="" type="checkbox"/> <b>None</b>                                              |                                                                                     |
|          |                                                                                                              |                                                                                              |                                                                                     |
|          |                                                                                                              |                                                                                              |                                                                                     |
| <b>8</b> | Patents planned, issued or pending                                                                           | <input checked="" type="checkbox"/> <b>None</b>                                              |                                                                                     |
|          |                                                                                                              |                                                                                              |                                                                                     |
|          |                                                                                                              |                                                                                              |                                                                                     |
| <b>9</b> | Participation on a Data Safety                                                                               | <input checked="" type="checkbox"/> <b>None</b>                                              |                                                                                     |

|           |                                                                                                   | Name all entities with whom you have this relationship or indicate none (add rows as needed) | Specifications/Comments (e.g., if payments were made to you or to your institution) |
|-----------|---------------------------------------------------------------------------------------------------|----------------------------------------------------------------------------------------------|-------------------------------------------------------------------------------------|
|           | Monitoring Board or Advisory Board                                                                | <input type="checkbox"/>                                                                     |                                                                                     |
|           |                                                                                                   | <input type="checkbox"/>                                                                     |                                                                                     |
|           |                                                                                                   | <input type="checkbox"/>                                                                     |                                                                                     |
| <b>10</b> | Leadership or fiduciary role in other board, society, committee or advocacy group, paid or unpaid | <input checked="" type="checkbox"/> <b>None</b>                                              |                                                                                     |
|           |                                                                                                   | <input type="checkbox"/>                                                                     |                                                                                     |
|           |                                                                                                   | <input type="checkbox"/>                                                                     |                                                                                     |
|           |                                                                                                   | <input type="checkbox"/>                                                                     |                                                                                     |
| <b>11</b> | Stock or stock options                                                                            | <input checked="" type="checkbox"/> <b>None</b>                                              |                                                                                     |
|           |                                                                                                   | <input type="checkbox"/>                                                                     |                                                                                     |
|           |                                                                                                   | <input type="checkbox"/>                                                                     |                                                                                     |
|           |                                                                                                   | <input type="checkbox"/>                                                                     |                                                                                     |
| <b>12</b> | Receipt of equipment, materials, drugs, medical writing, gifts or other services                  | <input checked="" type="checkbox"/> <b>None</b>                                              |                                                                                     |
|           |                                                                                                   | <input type="checkbox"/>                                                                     |                                                                                     |
|           |                                                                                                   | <input type="checkbox"/>                                                                     |                                                                                     |
|           |                                                                                                   | <input type="checkbox"/>                                                                     |                                                                                     |
| <b>13</b> | Other financial or non-financial interests                                                        | <input checked="" type="checkbox"/> <b>None</b>                                              |                                                                                     |
|           |                                                                                                   | <input type="checkbox"/>                                                                     |                                                                                     |
|           |                                                                                                   | <input type="checkbox"/>                                                                     |                                                                                     |
|           |                                                                                                   | <input type="checkbox"/>                                                                     |                                                                                     |

Please place an "X" next to the following statement to indicate your agreement:

I certify that I have answered every question and have not altered the wording of any of the questions on this form.

## ICMJE DISCLOSURE FORM

**Date:** 9/12/2023

**Your Name:** Karine Fauria

**Manuscript Title:** Genetic characterization of the ALFA study: Uncovering genetic profiles in the Alzheimer's continuum

**Manuscript Number (if known):** [Click or tap here to enter text.](#)

In the interest of transparency, we ask you to disclose all relationships/activities/interests listed below that are related to the content of your manuscript. "Related" means any relation with for-profit or not-for-profit third parties whose interests may be affected by the content of the manuscript. Disclosure represents a commitment to transparency and does not necessarily indicate a bias. If you are in doubt about whether to list a relationship/activity/interest, it is preferable that you do so.

The author's relationships/activities/interests should be defined broadly. For example, if your manuscript pertains to the epidemiology of hypertension, you should declare all relationships with manufacturers of antihypertensive medication, even if that medication is not mentioned in the manuscript.

In item #1 below, report all support for the work reported in this manuscript without time limit. For all other items, the time frame for disclosure is the past 36 months.

|                                                           |                                                                                                                                                                                | Name all entities with whom you have this relationship or indicate none (add rows as needed)                                                                                                                                                                                                                                                                                               | Specifications/Comments (e.g., if payments were made to you or to your institution) |
|-----------------------------------------------------------|--------------------------------------------------------------------------------------------------------------------------------------------------------------------------------|--------------------------------------------------------------------------------------------------------------------------------------------------------------------------------------------------------------------------------------------------------------------------------------------------------------------------------------------------------------------------------------------|-------------------------------------------------------------------------------------|
| <b>Time frame: Since the initial planning of the work</b> |                                                                                                                                                                                |                                                                                                                                                                                                                                                                                                                                                                                            |                                                                                     |
| <b>1</b>                                                  | All support for the present manuscript (e.g., funding, provision of study materials, medical writing, article processing charges, etc.)<br><b>No time limit for this item.</b> | <input type="checkbox"/> None                                                                                                                                                                                                                                                                                                                                                              |                                                                                     |
|                                                           |                                                                                                                                                                                | The project leading to these results has received funding from "la Caixa" Foundation (ID 100010434), under agreement LCF/PR/GN17/50300004                                                                                                                                                                                                                                                  |                                                                                     |
|                                                           |                                                                                                                                                                                | The project leading to these results has received funding from the Health Department of the Catalan Government (Health Research and Innovation Strategic Plan (PERIS) 2016-2020 grant# SLT002/16/00201). Additional support has been received from the Universities and Research Secretariat, Ministry of Business and Knowledge of the Catalan Government under grant no. 2021_SGR_00913. |                                                                                     |
|                                                           |                                                                                                                                                                                | The project leading to these results has received funding from the Alzheimer's Association (Grant AARG-19-618265).                                                                                                                                                                                                                                                                         | <small>Click the tab key to add additional rows.</small>                            |
| <b>Time frame: past 36 months</b>                         |                                                                                                                                                                                |                                                                                                                                                                                                                                                                                                                                                                                            |                                                                                     |

|   |                                                                                                              | Name all entities with whom you have this relationship or indicate none (add rows as needed)                                                                                                                                                                                                                                                                    | Specifications/Comments (e.g., if payments were made to you or to your institution) |  |  |  |  |  |  |  |  |
|---|--------------------------------------------------------------------------------------------------------------|-----------------------------------------------------------------------------------------------------------------------------------------------------------------------------------------------------------------------------------------------------------------------------------------------------------------------------------------------------------------|-------------------------------------------------------------------------------------|--|--|--|--|--|--|--|--|
| 2 | Grants or contracts from any entity (if not indicated in item #1 above).                                     | <input checked="" type="checkbox"/> None<br><table border="1" style="width: 100%; border-collapse: collapse;"> <tr><td style="width: 50%; height: 20px;"></td><td style="width: 50%;"></td></tr> <tr><td style="height: 20px;"></td><td></td></tr> <tr><td style="height: 20px;"></td><td></td></tr> </table>                                                   |                                                                                     |  |  |  |  |  |  |  |  |
|   |                                                                                                              |                                                                                                                                                                                                                                                                                                                                                                 |                                                                                     |  |  |  |  |  |  |  |  |
|   |                                                                                                              |                                                                                                                                                                                                                                                                                                                                                                 |                                                                                     |  |  |  |  |  |  |  |  |
|   |                                                                                                              |                                                                                                                                                                                                                                                                                                                                                                 |                                                                                     |  |  |  |  |  |  |  |  |
| 3 | Royalties or licenses                                                                                        | <input checked="" type="checkbox"/> None<br><table border="1" style="width: 100%; border-collapse: collapse;"> <tr><td style="width: 50%; height: 20px;"></td><td style="width: 50%;"></td></tr> <tr><td style="height: 20px;"></td><td></td></tr> <tr><td style="height: 20px;"></td><td></td></tr> </table>                                                   |                                                                                     |  |  |  |  |  |  |  |  |
|   |                                                                                                              |                                                                                                                                                                                                                                                                                                                                                                 |                                                                                     |  |  |  |  |  |  |  |  |
|   |                                                                                                              |                                                                                                                                                                                                                                                                                                                                                                 |                                                                                     |  |  |  |  |  |  |  |  |
|   |                                                                                                              |                                                                                                                                                                                                                                                                                                                                                                 |                                                                                     |  |  |  |  |  |  |  |  |
| 4 | Consulting fees                                                                                              | <input checked="" type="checkbox"/> None<br><table border="1" style="width: 100%; border-collapse: collapse;"> <tr><td style="width: 50%; height: 20px;"></td><td style="width: 50%;"></td></tr> <tr><td style="height: 20px;"></td><td></td></tr> <tr><td style="height: 20px;"></td><td></td></tr> <tr><td style="height: 20px;"></td><td></td></tr> </table> |                                                                                     |  |  |  |  |  |  |  |  |
|   |                                                                                                              |                                                                                                                                                                                                                                                                                                                                                                 |                                                                                     |  |  |  |  |  |  |  |  |
|   |                                                                                                              |                                                                                                                                                                                                                                                                                                                                                                 |                                                                                     |  |  |  |  |  |  |  |  |
|   |                                                                                                              |                                                                                                                                                                                                                                                                                                                                                                 |                                                                                     |  |  |  |  |  |  |  |  |
|   |                                                                                                              |                                                                                                                                                                                                                                                                                                                                                                 |                                                                                     |  |  |  |  |  |  |  |  |
| 5 | Payment or honoraria for lectures, presentations, speakers bureaus, manuscript writing or educational events | <input checked="" type="checkbox"/> None<br><table border="1" style="width: 100%; border-collapse: collapse;"> <tr><td style="width: 50%; height: 20px;"></td><td style="width: 50%;"></td></tr> <tr><td style="height: 20px;"></td><td></td></tr> <tr><td style="height: 20px;"></td><td></td></tr> </table>                                                   |                                                                                     |  |  |  |  |  |  |  |  |
|   |                                                                                                              |                                                                                                                                                                                                                                                                                                                                                                 |                                                                                     |  |  |  |  |  |  |  |  |
|   |                                                                                                              |                                                                                                                                                                                                                                                                                                                                                                 |                                                                                     |  |  |  |  |  |  |  |  |
|   |                                                                                                              |                                                                                                                                                                                                                                                                                                                                                                 |                                                                                     |  |  |  |  |  |  |  |  |
| 6 | Payment for expert testimony                                                                                 | <input checked="" type="checkbox"/> None<br><table border="1" style="width: 100%; border-collapse: collapse;"> <tr><td style="width: 50%; height: 20px;"></td><td style="width: 50%;"></td></tr> <tr><td style="height: 20px;"></td><td></td></tr> <tr><td style="height: 20px;"></td><td></td></tr> </table>                                                   |                                                                                     |  |  |  |  |  |  |  |  |
|   |                                                                                                              |                                                                                                                                                                                                                                                                                                                                                                 |                                                                                     |  |  |  |  |  |  |  |  |
|   |                                                                                                              |                                                                                                                                                                                                                                                                                                                                                                 |                                                                                     |  |  |  |  |  |  |  |  |
|   |                                                                                                              |                                                                                                                                                                                                                                                                                                                                                                 |                                                                                     |  |  |  |  |  |  |  |  |
| 7 | Support for attending meetings and/or travel                                                                 | <input checked="" type="checkbox"/> None<br><table border="1" style="width: 100%; border-collapse: collapse;"> <tr><td style="width: 50%; height: 20px;"></td><td style="width: 50%;"></td></tr> <tr><td style="height: 20px;"></td><td></td></tr> <tr><td style="height: 20px;"></td><td></td></tr> </table>                                                   |                                                                                     |  |  |  |  |  |  |  |  |
|   |                                                                                                              |                                                                                                                                                                                                                                                                                                                                                                 |                                                                                     |  |  |  |  |  |  |  |  |
|   |                                                                                                              |                                                                                                                                                                                                                                                                                                                                                                 |                                                                                     |  |  |  |  |  |  |  |  |
|   |                                                                                                              |                                                                                                                                                                                                                                                                                                                                                                 |                                                                                     |  |  |  |  |  |  |  |  |
| 8 | Patents planned, issued or pending                                                                           | <input checked="" type="checkbox"/> None<br><table border="1" style="width: 100%; border-collapse: collapse;"> <tr><td style="width: 50%; height: 20px;"></td><td style="width: 50%;"></td></tr> <tr><td style="height: 20px;"></td><td></td></tr> <tr><td style="height: 20px;"></td><td></td></tr> </table>                                                   |                                                                                     |  |  |  |  |  |  |  |  |
|   |                                                                                                              |                                                                                                                                                                                                                                                                                                                                                                 |                                                                                     |  |  |  |  |  |  |  |  |
|   |                                                                                                              |                                                                                                                                                                                                                                                                                                                                                                 |                                                                                     |  |  |  |  |  |  |  |  |
|   |                                                                                                              |                                                                                                                                                                                                                                                                                                                                                                 |                                                                                     |  |  |  |  |  |  |  |  |
| 9 | Participation on a Data Safety                                                                               | <input checked="" type="checkbox"/> None                                                                                                                                                                                                                                                                                                                        |                                                                                     |  |  |  |  |  |  |  |  |

|           |                                                                                                   | Name all entities with whom you have this relationship or indicate none (add rows as needed) | Specifications/Comments (e.g., if payments were made to you or to your institution) |
|-----------|---------------------------------------------------------------------------------------------------|----------------------------------------------------------------------------------------------|-------------------------------------------------------------------------------------|
|           | Monitoring Board or Advisory Board                                                                | <input type="checkbox"/>                                                                     |                                                                                     |
|           |                                                                                                   | <input type="checkbox"/>                                                                     |                                                                                     |
|           |                                                                                                   | <input type="checkbox"/>                                                                     |                                                                                     |
| <b>10</b> | Leadership or fiduciary role in other board, society, committee or advocacy group, paid or unpaid | <input checked="" type="checkbox"/> <b>None</b>                                              |                                                                                     |
|           |                                                                                                   | <input type="checkbox"/>                                                                     |                                                                                     |
|           |                                                                                                   | <input type="checkbox"/>                                                                     |                                                                                     |
|           |                                                                                                   | <input type="checkbox"/>                                                                     |                                                                                     |
| <b>11</b> | Stock or stock options                                                                            | <input checked="" type="checkbox"/> <b>None</b>                                              |                                                                                     |
|           |                                                                                                   | <input type="checkbox"/>                                                                     |                                                                                     |
|           |                                                                                                   | <input type="checkbox"/>                                                                     |                                                                                     |
|           |                                                                                                   | <input type="checkbox"/>                                                                     |                                                                                     |
| <b>12</b> | Receipt of equipment, materials, drugs, medical writing, gifts or other services                  | <input checked="" type="checkbox"/> <b>None</b>                                              |                                                                                     |
|           |                                                                                                   | <input type="checkbox"/>                                                                     |                                                                                     |
|           |                                                                                                   | <input type="checkbox"/>                                                                     |                                                                                     |
|           |                                                                                                   | <input type="checkbox"/>                                                                     |                                                                                     |
| <b>13</b> | Other financial or non-financial interests                                                        | <input checked="" type="checkbox"/> <b>None</b>                                              |                                                                                     |
|           |                                                                                                   | <input type="checkbox"/>                                                                     |                                                                                     |
|           |                                                                                                   | <input type="checkbox"/>                                                                     |                                                                                     |
|           |                                                                                                   | <input type="checkbox"/>                                                                     |                                                                                     |

Please place an "X" next to the following statement to indicate your agreement:

I certify that I have answered every question and have not altered the wording of any of the questions on this form.

## ICMJE DISCLOSURE FORM

**Date:** 9/12/2023

**Your Name:** Jose Luis Molinuevo

**Manuscript Title:** Genetic characterization of the ALFA study: Uncovering genetic profiles in the Alzheimer's continuum

**Manuscript Number (if known):** Click or tap here to enter text.

In the interest of transparency, we ask you to disclose all relationships/activities/interests listed below that are related to the content of your manuscript. "Related" means any relation with for-profit or not-for-profit third parties whose interests may be affected by the content of the manuscript. Disclosure represents a commitment to transparency and does not necessarily indicate a bias. If you are in doubt about whether to list a relationship/activity/interest, it is preferable that you do so.

The author's relationships/activities/interests should be defined broadly. For example, if your manuscript pertains to the epidemiology of hypertension, you should declare all relationships with manufacturers of antihypertensive medication, even if that medication is not mentioned in the manuscript.

In item #1 below, report all support for the work reported in this manuscript without time limit. For all other items, the time frame for disclosure is the past 36 months.

|                                                           |                                                                                                                                                                                | Name all entities with whom you have this relationship or indicate none (add rows as needed)                                                                                                                                                                                                                                                                                               | Specifications/Comments (e.g., if payments were made to you or to your institution) |
|-----------------------------------------------------------|--------------------------------------------------------------------------------------------------------------------------------------------------------------------------------|--------------------------------------------------------------------------------------------------------------------------------------------------------------------------------------------------------------------------------------------------------------------------------------------------------------------------------------------------------------------------------------------|-------------------------------------------------------------------------------------|
| <b>Time frame: Since the initial planning of the work</b> |                                                                                                                                                                                |                                                                                                                                                                                                                                                                                                                                                                                            |                                                                                     |
| <b>1</b>                                                  | All support for the present manuscript (e.g., funding, provision of study materials, medical writing, article processing charges, etc.)<br><b>No time limit for this item.</b> | <input type="checkbox"/> None                                                                                                                                                                                                                                                                                                                                                              |                                                                                     |
|                                                           |                                                                                                                                                                                | The project leading to these results has received funding from "la Caixa" Foundation (ID 100010434), under agreement LCF/PR/GN17/50300004                                                                                                                                                                                                                                                  |                                                                                     |
|                                                           |                                                                                                                                                                                | The project leading to these results has received funding from the Health Department of the Catalan Government (Health Research and Innovation Strategic Plan (PERIS) 2016-2020 grant# SLT002/16/00201). Additional support has been received from the Universities and Research Secretariat, Ministry of Business and Knowledge of the Catalan Government under grant no. 2021_SGR_00913. |                                                                                     |
|                                                           |                                                                                                                                                                                | The project leading to these results has received funding from the Alzheimer's Association (Grant AARG-19-618265).                                                                                                                                                                                                                                                                         | Click the tab key to add additional rows.                                           |
| <b>Time frame: past 36 months</b>                         |                                                                                                                                                                                |                                                                                                                                                                                                                                                                                                                                                                                            |                                                                                     |



|   |                                                                                                              | Name all entities with whom you have this relationship or indicate none (add rows as needed) | Specifications/Comments (e.g., if payments were made to you or to your institution) |
|---|--------------------------------------------------------------------------------------------------------------|----------------------------------------------------------------------------------------------|-------------------------------------------------------------------------------------|
| 2 | Grants or contracts from any entity (if not indicated in item #1 above).                                     | <input checked="" type="checkbox"/> None                                                     |                                                                                     |
|   |                                                                                                              |                                                                                              |                                                                                     |
|   |                                                                                                              |                                                                                              |                                                                                     |
| 3 | Royalties or licenses                                                                                        | <input checked="" type="checkbox"/> None                                                     |                                                                                     |
|   |                                                                                                              |                                                                                              |                                                                                     |
|   |                                                                                                              |                                                                                              |                                                                                     |
| 4 | Consulting fees                                                                                              | <input checked="" type="checkbox"/> None                                                     |                                                                                     |
|   |                                                                                                              |                                                                                              |                                                                                     |
|   |                                                                                                              |                                                                                              |                                                                                     |
| 5 | Payment or honoraria for lectures, presentations, speakers bureaus, manuscript writing or educational events | <input checked="" type="checkbox"/> None                                                     |                                                                                     |
|   |                                                                                                              |                                                                                              |                                                                                     |
|   |                                                                                                              |                                                                                              |                                                                                     |
| 6 | Payment for expert testimony                                                                                 | <input checked="" type="checkbox"/> None                                                     |                                                                                     |
|   |                                                                                                              |                                                                                              |                                                                                     |
|   |                                                                                                              |                                                                                              |                                                                                     |
| 7 | Support for attending meetings and/or travel                                                                 | <input checked="" type="checkbox"/> None                                                     |                                                                                     |
|   |                                                                                                              |                                                                                              |                                                                                     |
|   |                                                                                                              |                                                                                              |                                                                                     |
| 8 | Patents planned, issued or pending                                                                           | <input checked="" type="checkbox"/> None                                                     |                                                                                     |
|   |                                                                                                              |                                                                                              |                                                                                     |
|   |                                                                                                              |                                                                                              |                                                                                     |
| 9 | Participation on a Data Safety                                                                               | <input checked="" type="checkbox"/> None                                                     |                                                                                     |

|           |                                                                                                   | Name all entities with whom you have this relationship or indicate none (add rows as needed) | Specifications/Comments (e.g., if payments were made to you or to your institution) |
|-----------|---------------------------------------------------------------------------------------------------|----------------------------------------------------------------------------------------------|-------------------------------------------------------------------------------------|
|           | Monitoring Board or Advisory Board                                                                | <input type="text"/>                                                                         | <input type="text"/>                                                                |
|           |                                                                                                   | <input type="text"/>                                                                         | <input type="text"/>                                                                |
|           |                                                                                                   | <input type="text"/>                                                                         | <input type="text"/>                                                                |
| <b>10</b> | Leadership or fiduciary role in other board, society, committee or advocacy group, paid or unpaid | <input checked="" type="checkbox"/> <b>None</b>                                              |                                                                                     |
|           |                                                                                                   | <input type="text"/>                                                                         | <input type="text"/>                                                                |
|           |                                                                                                   | <input type="text"/>                                                                         | <input type="text"/>                                                                |
|           |                                                                                                   | <input type="text"/>                                                                         | <input type="text"/>                                                                |
| <b>11</b> | Stock or stock options                                                                            | <input checked="" type="checkbox"/> <b>None</b>                                              |                                                                                     |
|           |                                                                                                   | <input type="text"/>                                                                         | <input type="text"/>                                                                |
|           |                                                                                                   | <input type="text"/>                                                                         | <input type="text"/>                                                                |
|           |                                                                                                   | <input type="text"/>                                                                         | <input type="text"/>                                                                |
| <b>12</b> | Receipt of equipment, materials, drugs, medical writing, gifts or other services                  | <input checked="" type="checkbox"/> <b>None</b>                                              |                                                                                     |
|           |                                                                                                   | <input type="text"/>                                                                         | <input type="text"/>                                                                |
|           |                                                                                                   | <input type="text"/>                                                                         | <input type="text"/>                                                                |
|           |                                                                                                   | <input type="text"/>                                                                         | <input type="text"/>                                                                |
| <b>13</b> | Other financial or non-financial interests                                                        | <input checked="" type="checkbox"/> <b>None</b>                                              |                                                                                     |
|           |                                                                                                   | <input type="text"/>                                                                         | <input type="text"/>                                                                |
|           |                                                                                                   | <input type="text"/>                                                                         | <input type="text"/>                                                                |
|           |                                                                                                   | <input type="text"/>                                                                         | <input type="text"/>                                                                |

Please place an "X" next to the following statement to indicate your agreement:

I certify that I have answered every question and have not altered the wording of any of the questions on this form.

## ICMJE DISCLOSURE FORM

**Date:** 9/12/2023

**Your Name:** Arcadi Navarro

**Manuscript Title:** Genetic characterization of the ALFA study: Uncovering genetic profiles in the Alzheimer's continuum

**Manuscript Number (if known):** [Click or tap here to enter text.](#)

In the interest of transparency, we ask you to disclose all relationships/activities/interests listed below that are related to the content of your manuscript. "Related" means any relation with for-profit or not-for-profit third parties whose interests may be affected by the content of the manuscript. Disclosure represents a commitment to transparency and does not necessarily indicate a bias. If you are in doubt about whether to list a relationship/activity/interest, it is preferable that you do so.

The author's relationships/activities/interests should be defined broadly. For example, if your manuscript pertains to the epidemiology of hypertension, you should declare all relationships with manufacturers of antihypertensive medication, even if that medication is not mentioned in the manuscript.

In item #1 below, report all support for the work reported in this manuscript without time limit. For all other items, the time frame for disclosure is the past 36 months.

|                                                                                                                                                                                         | Name all entities with whom you have this relationship or indicate none (add rows as needed)                                                                                                                                                                                                                                                                                               | Specifications/Comments (e.g., if payments were made to you or to your institution) |
|-----------------------------------------------------------------------------------------------------------------------------------------------------------------------------------------|--------------------------------------------------------------------------------------------------------------------------------------------------------------------------------------------------------------------------------------------------------------------------------------------------------------------------------------------------------------------------------------------|-------------------------------------------------------------------------------------|
| Time frame: Since the initial planning of the work                                                                                                                                      |                                                                                                                                                                                                                                                                                                                                                                                            |                                                                                     |
| <b>1</b> All support for the present manuscript (e.g., funding, provision of study materials, medical writing, article processing charges, etc.)<br><b>No time limit for this item.</b> | <input type="checkbox"/> None                                                                                                                                                                                                                                                                                                                                                              |                                                                                     |
|                                                                                                                                                                                         | The project leading to these results has received funding from "la Caixa" Foundation (ID 100010434), under agreement LCF/PR/GN17/50300004                                                                                                                                                                                                                                                  |                                                                                     |
|                                                                                                                                                                                         | The project leading to these results has received funding from the Health Department of the Catalan Government (Health Research and Innovation Strategic Plan (PERIS) 2016-2020 grant# SLT002/16/00201). Additional support has been received from the Universities and Research Secretariat, Ministry of Business and Knowledge of the Catalan Government under grant no. 2021_SGR_00913. |                                                                                     |
|                                                                                                                                                                                         | The project leading to these results has received funding from the Alzheimer's Association (Grant AARG-19-618265).                                                                                                                                                                                                                                                                         | <a href="#">Click the tab key to add additional rows.</a>                           |
| Time frame: past 36 months                                                                                                                                                              |                                                                                                                                                                                                                                                                                                                                                                                            |                                                                                     |

|   |                                                                                                              | Name all entities with whom you have this relationship or indicate none (add rows as needed)                                                                                                                                                                                                                                                                    | Specifications/Comments (e.g., if payments were made to you or to your institution) |  |  |  |  |  |  |  |  |
|---|--------------------------------------------------------------------------------------------------------------|-----------------------------------------------------------------------------------------------------------------------------------------------------------------------------------------------------------------------------------------------------------------------------------------------------------------------------------------------------------------|-------------------------------------------------------------------------------------|--|--|--|--|--|--|--|--|
| 2 | Grants or contracts from any entity (if not indicated in item #1 above).                                     | <input checked="" type="checkbox"/> None<br><table border="1" style="width: 100%; border-collapse: collapse;"> <tr><td style="width: 50%; height: 20px;"></td><td style="width: 50%;"></td></tr> <tr><td style="height: 20px;"></td><td></td></tr> <tr><td style="height: 20px;"></td><td></td></tr> </table>                                                   |                                                                                     |  |  |  |  |  |  |  |  |
|   |                                                                                                              |                                                                                                                                                                                                                                                                                                                                                                 |                                                                                     |  |  |  |  |  |  |  |  |
|   |                                                                                                              |                                                                                                                                                                                                                                                                                                                                                                 |                                                                                     |  |  |  |  |  |  |  |  |
|   |                                                                                                              |                                                                                                                                                                                                                                                                                                                                                                 |                                                                                     |  |  |  |  |  |  |  |  |
| 3 | Royalties or licenses                                                                                        | <input checked="" type="checkbox"/> None<br><table border="1" style="width: 100%; border-collapse: collapse;"> <tr><td style="width: 50%; height: 20px;"></td><td style="width: 50%;"></td></tr> <tr><td style="height: 20px;"></td><td></td></tr> <tr><td style="height: 20px;"></td><td></td></tr> </table>                                                   |                                                                                     |  |  |  |  |  |  |  |  |
|   |                                                                                                              |                                                                                                                                                                                                                                                                                                                                                                 |                                                                                     |  |  |  |  |  |  |  |  |
|   |                                                                                                              |                                                                                                                                                                                                                                                                                                                                                                 |                                                                                     |  |  |  |  |  |  |  |  |
|   |                                                                                                              |                                                                                                                                                                                                                                                                                                                                                                 |                                                                                     |  |  |  |  |  |  |  |  |
| 4 | Consulting fees                                                                                              | <input checked="" type="checkbox"/> None<br><table border="1" style="width: 100%; border-collapse: collapse;"> <tr><td style="width: 50%; height: 20px;"></td><td style="width: 50%;"></td></tr> <tr><td style="height: 20px;"></td><td></td></tr> <tr><td style="height: 20px;"></td><td></td></tr> <tr><td style="height: 20px;"></td><td></td></tr> </table> |                                                                                     |  |  |  |  |  |  |  |  |
|   |                                                                                                              |                                                                                                                                                                                                                                                                                                                                                                 |                                                                                     |  |  |  |  |  |  |  |  |
|   |                                                                                                              |                                                                                                                                                                                                                                                                                                                                                                 |                                                                                     |  |  |  |  |  |  |  |  |
|   |                                                                                                              |                                                                                                                                                                                                                                                                                                                                                                 |                                                                                     |  |  |  |  |  |  |  |  |
|   |                                                                                                              |                                                                                                                                                                                                                                                                                                                                                                 |                                                                                     |  |  |  |  |  |  |  |  |
| 5 | Payment or honoraria for lectures, presentations, speakers bureaus, manuscript writing or educational events | <input checked="" type="checkbox"/> None<br><table border="1" style="width: 100%; border-collapse: collapse;"> <tr><td style="width: 50%; height: 20px;"></td><td style="width: 50%;"></td></tr> <tr><td style="height: 20px;"></td><td></td></tr> <tr><td style="height: 20px;"></td><td></td></tr> </table>                                                   |                                                                                     |  |  |  |  |  |  |  |  |
|   |                                                                                                              |                                                                                                                                                                                                                                                                                                                                                                 |                                                                                     |  |  |  |  |  |  |  |  |
|   |                                                                                                              |                                                                                                                                                                                                                                                                                                                                                                 |                                                                                     |  |  |  |  |  |  |  |  |
|   |                                                                                                              |                                                                                                                                                                                                                                                                                                                                                                 |                                                                                     |  |  |  |  |  |  |  |  |
| 6 | Payment for expert testimony                                                                                 | <input checked="" type="checkbox"/> None<br><table border="1" style="width: 100%; border-collapse: collapse;"> <tr><td style="width: 50%; height: 20px;"></td><td style="width: 50%;"></td></tr> <tr><td style="height: 20px;"></td><td></td></tr> <tr><td style="height: 20px;"></td><td></td></tr> </table>                                                   |                                                                                     |  |  |  |  |  |  |  |  |
|   |                                                                                                              |                                                                                                                                                                                                                                                                                                                                                                 |                                                                                     |  |  |  |  |  |  |  |  |
|   |                                                                                                              |                                                                                                                                                                                                                                                                                                                                                                 |                                                                                     |  |  |  |  |  |  |  |  |
|   |                                                                                                              |                                                                                                                                                                                                                                                                                                                                                                 |                                                                                     |  |  |  |  |  |  |  |  |
| 7 | Support for attending meetings and/or travel                                                                 | <input checked="" type="checkbox"/> None<br><table border="1" style="width: 100%; border-collapse: collapse;"> <tr><td style="width: 50%; height: 20px;"></td><td style="width: 50%;"></td></tr> <tr><td style="height: 20px;"></td><td></td></tr> <tr><td style="height: 20px;"></td><td></td></tr> </table>                                                   |                                                                                     |  |  |  |  |  |  |  |  |
|   |                                                                                                              |                                                                                                                                                                                                                                                                                                                                                                 |                                                                                     |  |  |  |  |  |  |  |  |
|   |                                                                                                              |                                                                                                                                                                                                                                                                                                                                                                 |                                                                                     |  |  |  |  |  |  |  |  |
|   |                                                                                                              |                                                                                                                                                                                                                                                                                                                                                                 |                                                                                     |  |  |  |  |  |  |  |  |
| 8 | Patents planned, issued or pending                                                                           | <input checked="" type="checkbox"/> None<br><table border="1" style="width: 100%; border-collapse: collapse;"> <tr><td style="width: 50%; height: 20px;"></td><td style="width: 50%;"></td></tr> <tr><td style="height: 20px;"></td><td></td></tr> <tr><td style="height: 20px;"></td><td></td></tr> </table>                                                   |                                                                                     |  |  |  |  |  |  |  |  |
|   |                                                                                                              |                                                                                                                                                                                                                                                                                                                                                                 |                                                                                     |  |  |  |  |  |  |  |  |
|   |                                                                                                              |                                                                                                                                                                                                                                                                                                                                                                 |                                                                                     |  |  |  |  |  |  |  |  |
|   |                                                                                                              |                                                                                                                                                                                                                                                                                                                                                                 |                                                                                     |  |  |  |  |  |  |  |  |
| 9 | Participation on a Data Safety                                                                               | <input checked="" type="checkbox"/> None                                                                                                                                                                                                                                                                                                                        |                                                                                     |  |  |  |  |  |  |  |  |

|           |                                                                                                   | Name all entities with whom you have this relationship or indicate none (add rows as needed) | Specifications/Comments (e.g., if payments were made to you or to your institution) |
|-----------|---------------------------------------------------------------------------------------------------|----------------------------------------------------------------------------------------------|-------------------------------------------------------------------------------------|
|           | Monitoring Board or Advisory Board                                                                | <input type="checkbox"/>                                                                     |                                                                                     |
|           |                                                                                                   | <input type="checkbox"/>                                                                     |                                                                                     |
|           |                                                                                                   | <input type="checkbox"/>                                                                     |                                                                                     |
| <b>10</b> | Leadership or fiduciary role in other board, society, committee or advocacy group, paid or unpaid | <input checked="" type="checkbox"/> <b>None</b>                                              |                                                                                     |
|           |                                                                                                   | <input type="checkbox"/>                                                                     |                                                                                     |
|           |                                                                                                   | <input type="checkbox"/>                                                                     |                                                                                     |
|           |                                                                                                   | <input type="checkbox"/>                                                                     |                                                                                     |
| <b>11</b> | Stock or stock options                                                                            | <input checked="" type="checkbox"/> <b>None</b>                                              |                                                                                     |
|           |                                                                                                   | <input type="checkbox"/>                                                                     |                                                                                     |
|           |                                                                                                   | <input type="checkbox"/>                                                                     |                                                                                     |
|           |                                                                                                   | <input type="checkbox"/>                                                                     |                                                                                     |
| <b>12</b> | Receipt of equipment, materials, drugs, medical writing, gifts or other services                  | <input checked="" type="checkbox"/> <b>None</b>                                              |                                                                                     |
|           |                                                                                                   | <input type="checkbox"/>                                                                     |                                                                                     |
|           |                                                                                                   | <input type="checkbox"/>                                                                     |                                                                                     |
|           |                                                                                                   | <input type="checkbox"/>                                                                     |                                                                                     |
| <b>13</b> | Other financial or non-financial interests                                                        | <input checked="" type="checkbox"/> <b>None</b>                                              |                                                                                     |
|           |                                                                                                   | <input type="checkbox"/>                                                                     |                                                                                     |
|           |                                                                                                   | <input type="checkbox"/>                                                                     |                                                                                     |
|           |                                                                                                   | <input type="checkbox"/>                                                                     |                                                                                     |

Please place an "X" next to the following statement to indicate your agreement:

I certify that I have answered every question and have not altered the wording of any of the questions on this form.

## ICMJE DISCLOSURE FORM

**Date:** 9/12/2023

**Your Name:** Juan Domingo Gispert

**Manuscript Title:** Genetic characterization of the ALFA study: Uncovering genetic profiles in the Alzheimer's continuum

**Manuscript Number (if known):** [Click or tap here to enter text.](#)

In the interest of transparency, we ask you to disclose all relationships/activities/interests listed below that are related to the content of your manuscript. "Related" means any relation with for-profit or not-for-profit third parties whose interests may be affected by the content of the manuscript. Disclosure represents a commitment to transparency and does not necessarily indicate a bias. If you are in doubt about whether to list a relationship/activity/interest, it is preferable that you do so.

The author's relationships/activities/interests should be defined broadly. For example, if your manuscript pertains to the epidemiology of hypertension, you should declare all relationships with manufacturers of antihypertensive medication, even if that medication is not mentioned in the manuscript.

In item #1 below, report all support for the work reported in this manuscript without time limit. For all other items, the time frame for disclosure is the past 36 months.

|                                                           |                                                                                                                                                                                | Name all entities with whom you have this relationship or indicate none (add rows as needed)                                                                                                                                                                                                                                                                                               | Specifications/Comments (e.g., if payments were made to you or to your institution) |
|-----------------------------------------------------------|--------------------------------------------------------------------------------------------------------------------------------------------------------------------------------|--------------------------------------------------------------------------------------------------------------------------------------------------------------------------------------------------------------------------------------------------------------------------------------------------------------------------------------------------------------------------------------------|-------------------------------------------------------------------------------------|
| <b>Time frame: Since the initial planning of the work</b> |                                                                                                                                                                                |                                                                                                                                                                                                                                                                                                                                                                                            |                                                                                     |
| <b>1</b>                                                  | All support for the present manuscript (e.g., funding, provision of study materials, medical writing, article processing charges, etc.)<br><b>No time limit for this item.</b> | <input type="checkbox"/> None                                                                                                                                                                                                                                                                                                                                                              |                                                                                     |
|                                                           |                                                                                                                                                                                | The project leading to these results has received funding from "la Caixa" Foundation (ID 100010434), under agreement LCF/PR/GN17/50300004                                                                                                                                                                                                                                                  |                                                                                     |
|                                                           |                                                                                                                                                                                | The project leading to these results has received funding from the Health Department of the Catalan Government (Health Research and Innovation Strategic Plan (PERIS) 2016-2020 grant# SLT002/16/00201). Additional support has been received from the Universities and Research Secretariat, Ministry of Business and Knowledge of the Catalan Government under grant no. 2021_SGR_00913. |                                                                                     |
|                                                           |                                                                                                                                                                                | The project leading to these results has received funding from the Alzheimer's Association (Grant AARG-19-618265).                                                                                                                                                                                                                                                                         | <a href="#">Click the tab key to add additional rows.</a>                           |
| <b>Time frame: past 36 months</b>                         |                                                                                                                                                                                |                                                                                                                                                                                                                                                                                                                                                                                            |                                                                                     |

|   |                                                                                                              | Name all entities with whom you have this relationship or indicate none (add rows as needed)                                                                                                                                                                                                                                                                                                                                                           | Specifications/Comments (e.g., if payments were made to you or to your institution) |  |  |  |  |  |  |  |  |
|---|--------------------------------------------------------------------------------------------------------------|--------------------------------------------------------------------------------------------------------------------------------------------------------------------------------------------------------------------------------------------------------------------------------------------------------------------------------------------------------------------------------------------------------------------------------------------------------|-------------------------------------------------------------------------------------|--|--|--|--|--|--|--|--|
| 2 | Grants or contracts from any entity (if not indicated in item #1 above).                                     | <input checked="" type="checkbox"/> <b>None</b><br><table border="1" style="width: 100%; border-collapse: collapse;"> <tr><td style="width: 50%; height: 15px;"></td><td style="width: 50%; height: 15px;"></td></tr> <tr><td style="height: 15px;"></td><td style="height: 15px;"></td></tr> <tr><td style="height: 15px;"></td><td style="height: 15px;"></td></tr> </table>                                                                         |                                                                                     |  |  |  |  |  |  |  |  |
|   |                                                                                                              |                                                                                                                                                                                                                                                                                                                                                                                                                                                        |                                                                                     |  |  |  |  |  |  |  |  |
|   |                                                                                                              |                                                                                                                                                                                                                                                                                                                                                                                                                                                        |                                                                                     |  |  |  |  |  |  |  |  |
|   |                                                                                                              |                                                                                                                                                                                                                                                                                                                                                                                                                                                        |                                                                                     |  |  |  |  |  |  |  |  |
| 3 | Royalties or licenses                                                                                        | <input checked="" type="checkbox"/> <b>None</b><br><table border="1" style="width: 100%; border-collapse: collapse;"> <tr><td style="width: 50%; height: 15px;"></td><td style="width: 50%; height: 15px;"></td></tr> <tr><td style="height: 15px;"></td><td style="height: 15px;"></td></tr> <tr><td style="height: 15px;"></td><td style="height: 15px;"></td></tr> </table>                                                                         |                                                                                     |  |  |  |  |  |  |  |  |
|   |                                                                                                              |                                                                                                                                                                                                                                                                                                                                                                                                                                                        |                                                                                     |  |  |  |  |  |  |  |  |
|   |                                                                                                              |                                                                                                                                                                                                                                                                                                                                                                                                                                                        |                                                                                     |  |  |  |  |  |  |  |  |
|   |                                                                                                              |                                                                                                                                                                                                                                                                                                                                                                                                                                                        |                                                                                     |  |  |  |  |  |  |  |  |
| 4 | Consulting fees                                                                                              | <input checked="" type="checkbox"/> <b>None</b><br><table border="1" style="width: 100%; border-collapse: collapse;"> <tr><td style="width: 50%; height: 15px;"></td><td style="width: 50%; height: 15px;"></td></tr> <tr><td style="height: 15px;"></td><td style="height: 15px;"></td></tr> <tr><td style="height: 15px;"></td><td style="height: 15px;"></td></tr> <tr><td style="height: 15px;"></td><td style="height: 15px;"></td></tr> </table> |                                                                                     |  |  |  |  |  |  |  |  |
|   |                                                                                                              |                                                                                                                                                                                                                                                                                                                                                                                                                                                        |                                                                                     |  |  |  |  |  |  |  |  |
|   |                                                                                                              |                                                                                                                                                                                                                                                                                                                                                                                                                                                        |                                                                                     |  |  |  |  |  |  |  |  |
|   |                                                                                                              |                                                                                                                                                                                                                                                                                                                                                                                                                                                        |                                                                                     |  |  |  |  |  |  |  |  |
|   |                                                                                                              |                                                                                                                                                                                                                                                                                                                                                                                                                                                        |                                                                                     |  |  |  |  |  |  |  |  |
| 5 | Payment or honoraria for lectures, presentations, speakers bureaus, manuscript writing or educational events | <input checked="" type="checkbox"/> <b>None</b><br><table border="1" style="width: 100%; border-collapse: collapse;"> <tr><td style="width: 50%; height: 15px;"></td><td style="width: 50%; height: 15px;"></td></tr> <tr><td style="height: 15px;"></td><td style="height: 15px;"></td></tr> <tr><td style="height: 15px;"></td><td style="height: 15px;"></td></tr> </table>                                                                         |                                                                                     |  |  |  |  |  |  |  |  |
|   |                                                                                                              |                                                                                                                                                                                                                                                                                                                                                                                                                                                        |                                                                                     |  |  |  |  |  |  |  |  |
|   |                                                                                                              |                                                                                                                                                                                                                                                                                                                                                                                                                                                        |                                                                                     |  |  |  |  |  |  |  |  |
|   |                                                                                                              |                                                                                                                                                                                                                                                                                                                                                                                                                                                        |                                                                                     |  |  |  |  |  |  |  |  |
| 6 | Payment for expert testimony                                                                                 | <input checked="" type="checkbox"/> <b>None</b><br><table border="1" style="width: 100%; border-collapse: collapse;"> <tr><td style="width: 50%; height: 15px;"></td><td style="width: 50%; height: 15px;"></td></tr> <tr><td style="height: 15px;"></td><td style="height: 15px;"></td></tr> <tr><td style="height: 15px;"></td><td style="height: 15px;"></td></tr> </table>                                                                         |                                                                                     |  |  |  |  |  |  |  |  |
|   |                                                                                                              |                                                                                                                                                                                                                                                                                                                                                                                                                                                        |                                                                                     |  |  |  |  |  |  |  |  |
|   |                                                                                                              |                                                                                                                                                                                                                                                                                                                                                                                                                                                        |                                                                                     |  |  |  |  |  |  |  |  |
|   |                                                                                                              |                                                                                                                                                                                                                                                                                                                                                                                                                                                        |                                                                                     |  |  |  |  |  |  |  |  |
| 7 | Support for attending meetings and/or travel                                                                 | <input checked="" type="checkbox"/> <b>None</b><br><table border="1" style="width: 100%; border-collapse: collapse;"> <tr><td style="width: 50%; height: 15px;"></td><td style="width: 50%; height: 15px;"></td></tr> <tr><td style="height: 15px;"></td><td style="height: 15px;"></td></tr> <tr><td style="height: 15px;"></td><td style="height: 15px;"></td></tr> </table>                                                                         |                                                                                     |  |  |  |  |  |  |  |  |
|   |                                                                                                              |                                                                                                                                                                                                                                                                                                                                                                                                                                                        |                                                                                     |  |  |  |  |  |  |  |  |
|   |                                                                                                              |                                                                                                                                                                                                                                                                                                                                                                                                                                                        |                                                                                     |  |  |  |  |  |  |  |  |
|   |                                                                                                              |                                                                                                                                                                                                                                                                                                                                                                                                                                                        |                                                                                     |  |  |  |  |  |  |  |  |
| 8 | Patents planned, issued or pending                                                                           | <input checked="" type="checkbox"/> <b>None</b><br><table border="1" style="width: 100%; border-collapse: collapse;"> <tr><td style="width: 50%; height: 15px;"></td><td style="width: 50%; height: 15px;"></td></tr> <tr><td style="height: 15px;"></td><td style="height: 15px;"></td></tr> <tr><td style="height: 15px;"></td><td style="height: 15px;"></td></tr> </table>                                                                         |                                                                                     |  |  |  |  |  |  |  |  |
|   |                                                                                                              |                                                                                                                                                                                                                                                                                                                                                                                                                                                        |                                                                                     |  |  |  |  |  |  |  |  |
|   |                                                                                                              |                                                                                                                                                                                                                                                                                                                                                                                                                                                        |                                                                                     |  |  |  |  |  |  |  |  |
|   |                                                                                                              |                                                                                                                                                                                                                                                                                                                                                                                                                                                        |                                                                                     |  |  |  |  |  |  |  |  |
| 9 | Participation on a Data Safety                                                                               | <input checked="" type="checkbox"/> <b>None</b>                                                                                                                                                                                                                                                                                                                                                                                                        |                                                                                     |  |  |  |  |  |  |  |  |

|           |                                                                                                   | Name all entities with whom you have this relationship or indicate none (add rows as needed) | Specifications/Comments (e.g., if payments were made to you or to your institution) |
|-----------|---------------------------------------------------------------------------------------------------|----------------------------------------------------------------------------------------------|-------------------------------------------------------------------------------------|
|           | Monitoring Board or Advisory Board                                                                | <input type="checkbox"/>                                                                     |                                                                                     |
|           |                                                                                                   | <input type="checkbox"/>                                                                     |                                                                                     |
|           |                                                                                                   | <input type="checkbox"/>                                                                     |                                                                                     |
| <b>10</b> | Leadership or fiduciary role in other board, society, committee or advocacy group, paid or unpaid | <input checked="" type="checkbox"/> <b>None</b>                                              |                                                                                     |
|           |                                                                                                   | <input type="checkbox"/>                                                                     |                                                                                     |
|           |                                                                                                   | <input type="checkbox"/>                                                                     |                                                                                     |
|           |                                                                                                   | <input type="checkbox"/>                                                                     |                                                                                     |
| <b>11</b> | Stock or stock options                                                                            | <input checked="" type="checkbox"/> <b>None</b>                                              |                                                                                     |
|           |                                                                                                   | <input type="checkbox"/>                                                                     |                                                                                     |
|           |                                                                                                   | <input type="checkbox"/>                                                                     |                                                                                     |
|           |                                                                                                   | <input type="checkbox"/>                                                                     |                                                                                     |
| <b>12</b> | Receipt of equipment, materials, drugs, medical writing, gifts or other services                  | <input checked="" type="checkbox"/> <b>None</b>                                              |                                                                                     |
|           |                                                                                                   | <input type="checkbox"/>                                                                     |                                                                                     |
|           |                                                                                                   | <input type="checkbox"/>                                                                     |                                                                                     |
|           |                                                                                                   | <input type="checkbox"/>                                                                     |                                                                                     |
| <b>13</b> | Other financial or non-financial interests                                                        | <input checked="" type="checkbox"/> <b>None</b>                                              |                                                                                     |
|           |                                                                                                   | <input type="checkbox"/>                                                                     |                                                                                     |
|           |                                                                                                   | <input type="checkbox"/>                                                                     |                                                                                     |
|           |                                                                                                   | <input type="checkbox"/>                                                                     |                                                                                     |

Please place an "X" next to the following statement to indicate your agreement:

I certify that I have answered every question and have not altered the wording of any of the questions on this form.
