# Supplementary material for: Genetic characterization of the ALFA study: Uncovering genetic profiles in the Alzheimer's continuum
Source: PubMed Central journal article supplement — Alzheimers Dement. 2023 Dec 13;20(3):1703–15. doi: 10.1002/alz.13537 (PMC10984507; doi:10.1002/alz.13537), 2023-12-13
Supplement: ALZ-20-1703-s024.pdf [file ALZ-20-1703-s024.pdf]

### A. Alzheimer's Disease

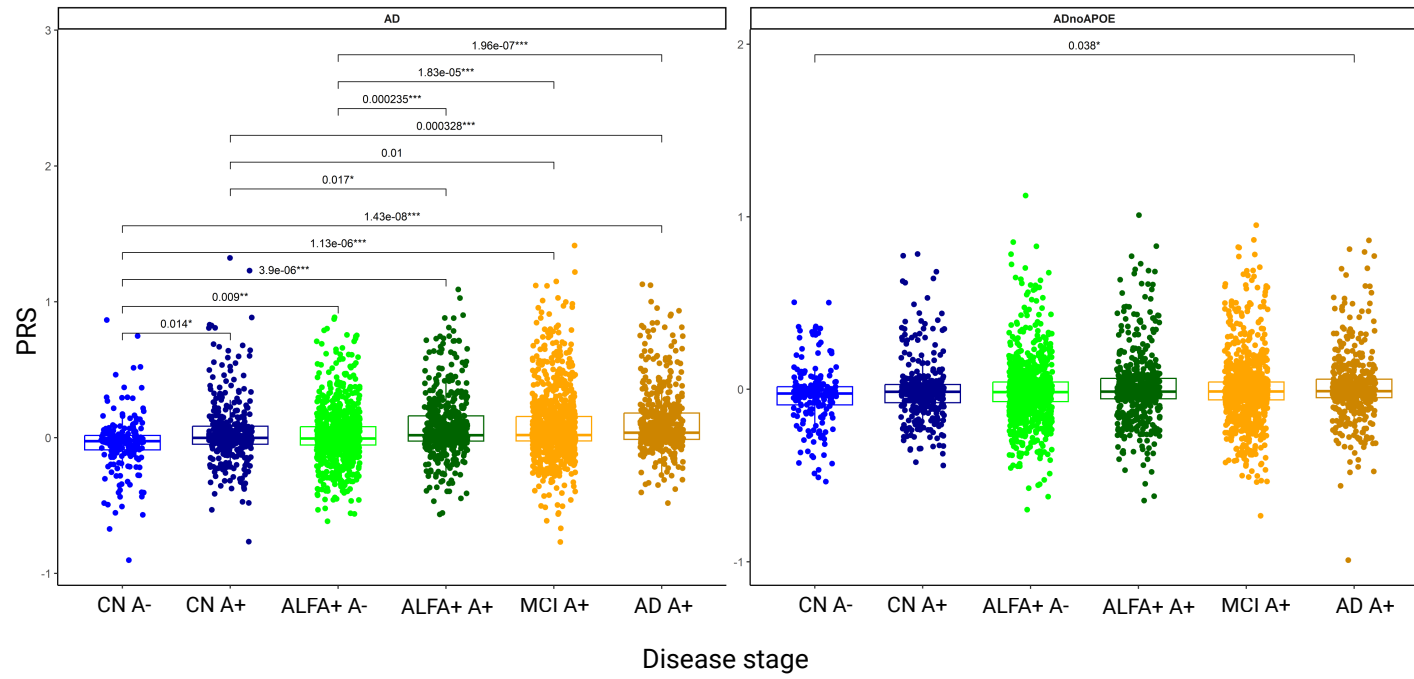

### B. Other neurodegenerative conditions

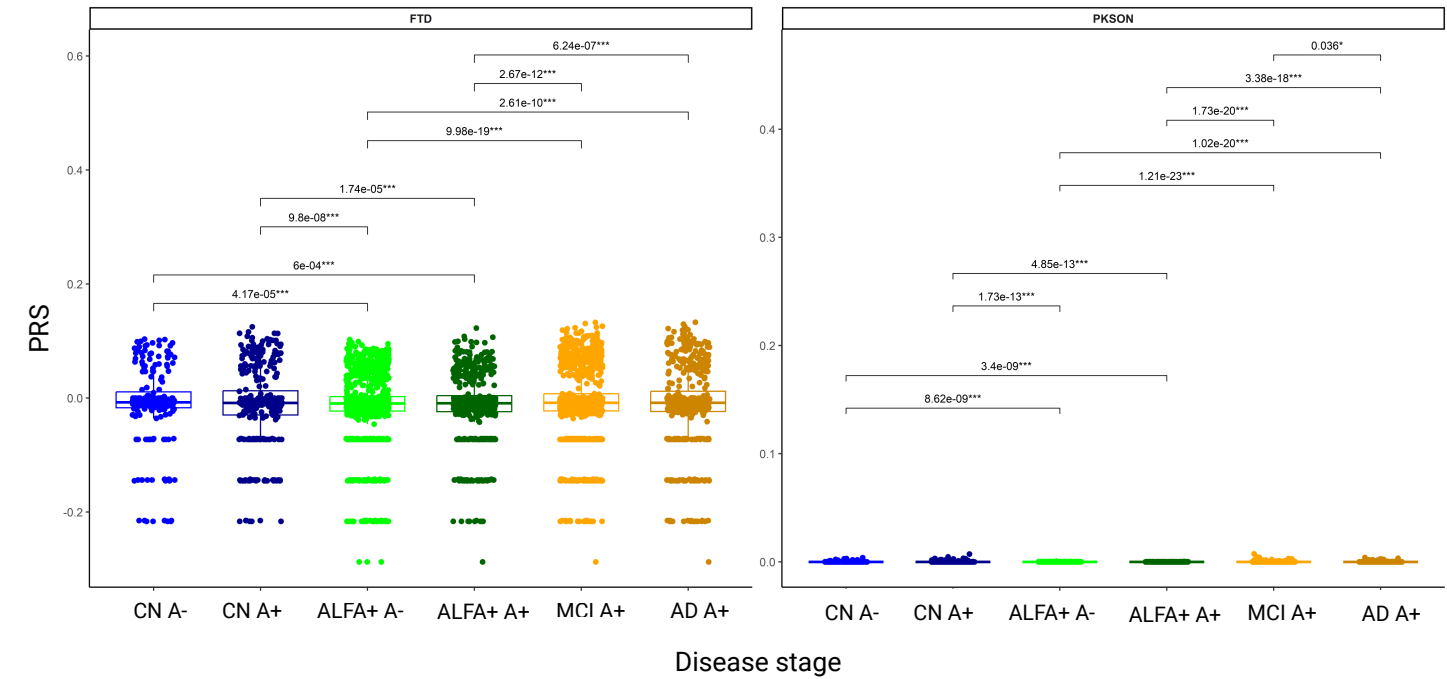

### C. Aging conditions

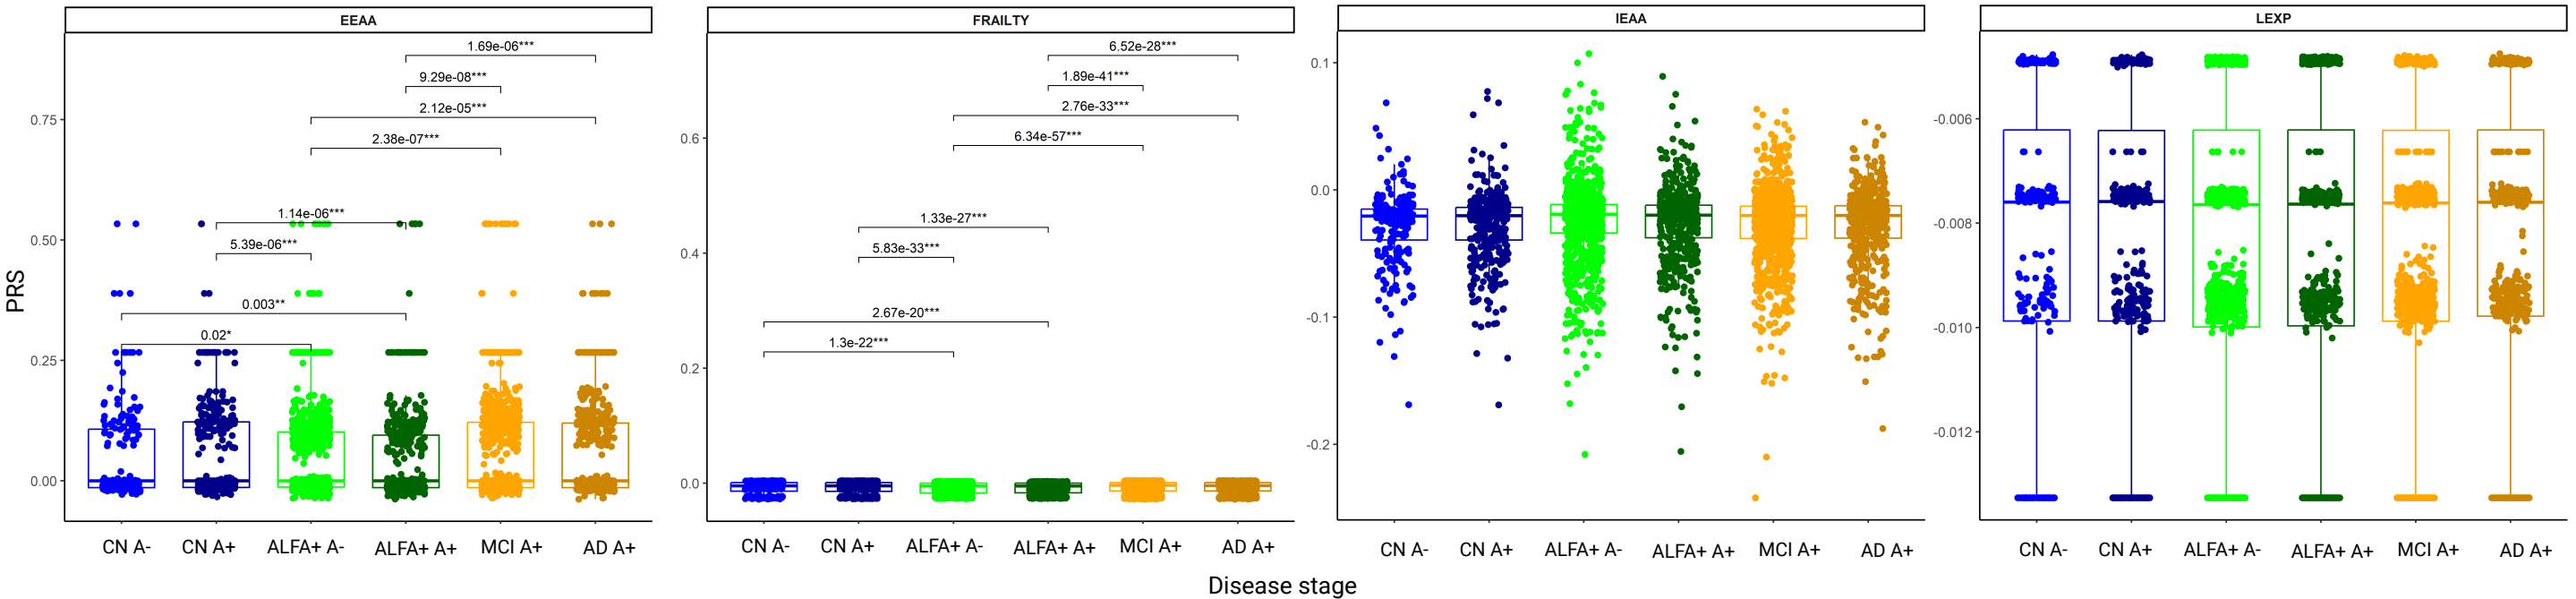

**Supplementary Figure 5.** Distribution of genetic scores of Alzheimer's disease (A) and other neurodegenerative (B) and aging (C) conditions along the disease continuum stratifying by amyloid status. Pairwise comparisons are assessed to compare the median (Wilcoxon test) of the PRS among groups. Significant results at nominal p-value are displayed (p-value <0.05\*; p-value <0.01\*\*; p-value <0.001\*\*\*).
