# Supplementary material for: Genetic characterization of the ALFA study: Uncovering genetic profiles in the Alzheimer's continuum
Source: PubMed Central journal article supplement — Alzheimers Dement. 2023 Dec 13;20(3):1703–15. doi: 10.1002/alz.13537 (PMC10984507; doi:10.1002/alz.13537), 2023-12-13
Supplement: ALZ-20-1703-s027.pdf [file ALZ-20-1703-s027.pdf]

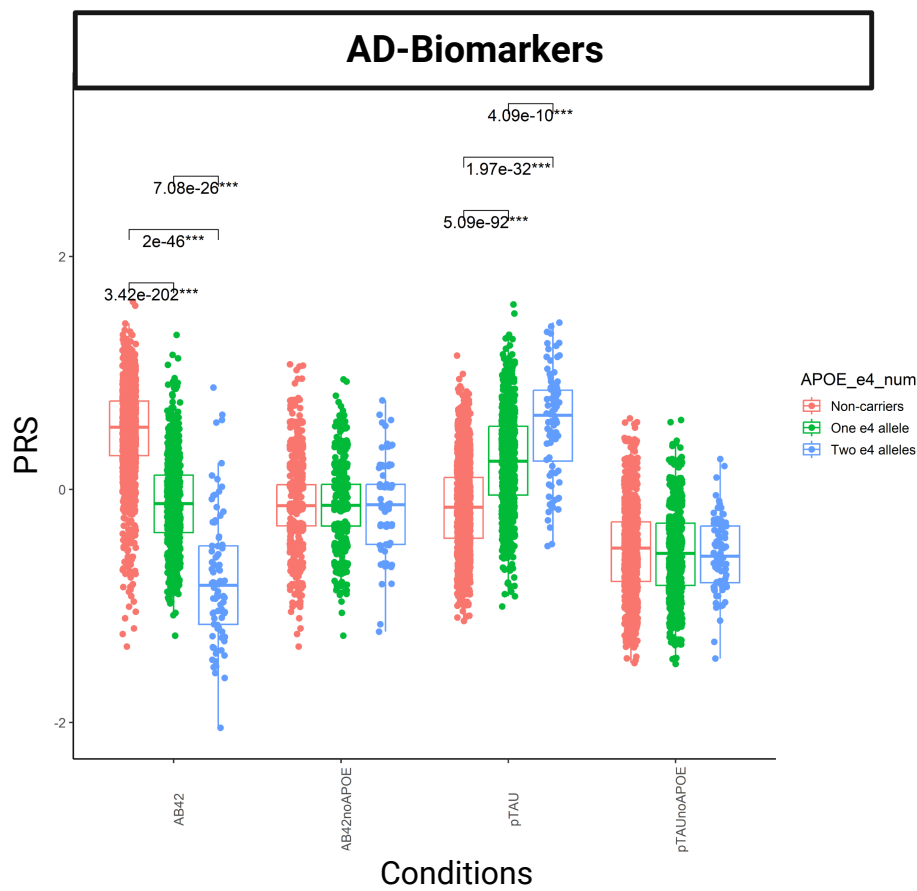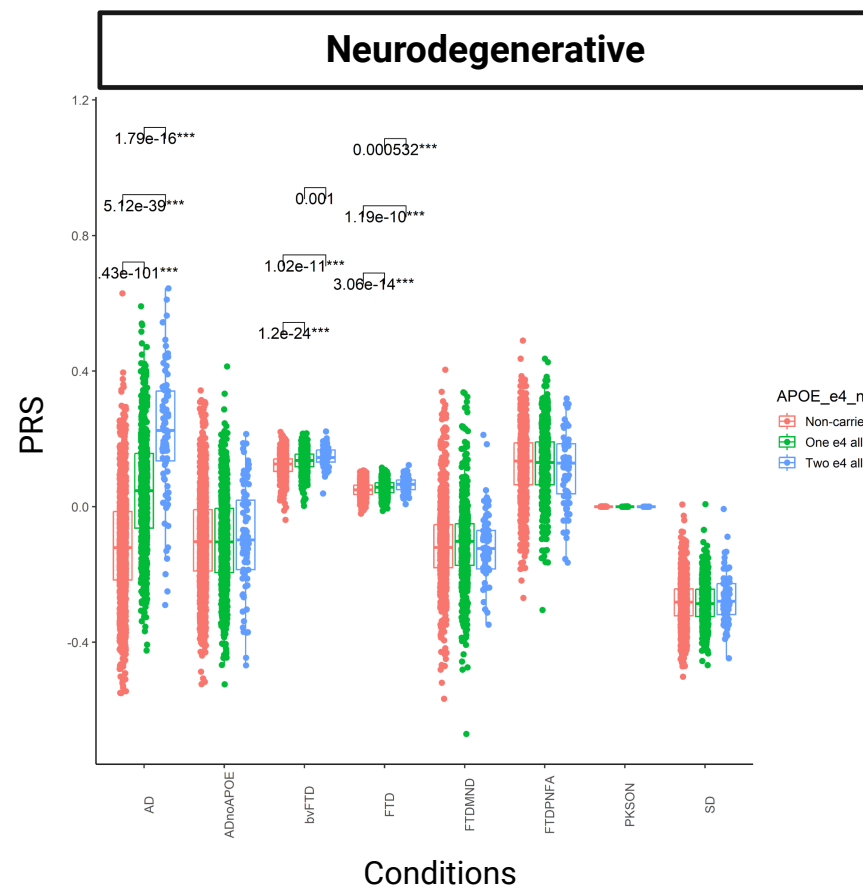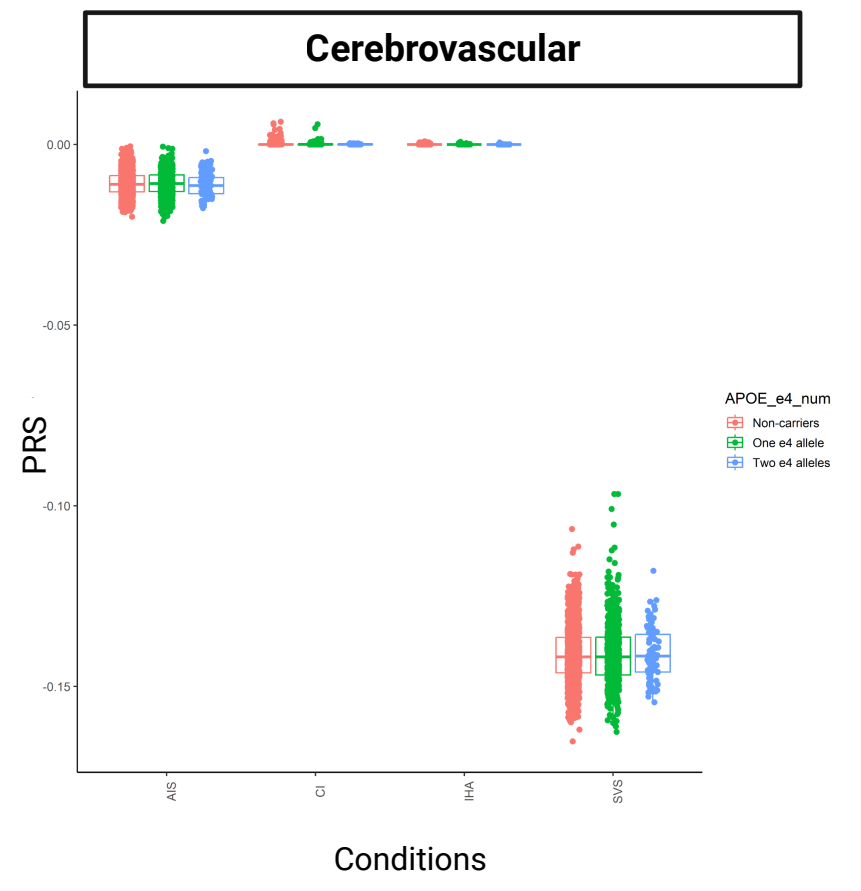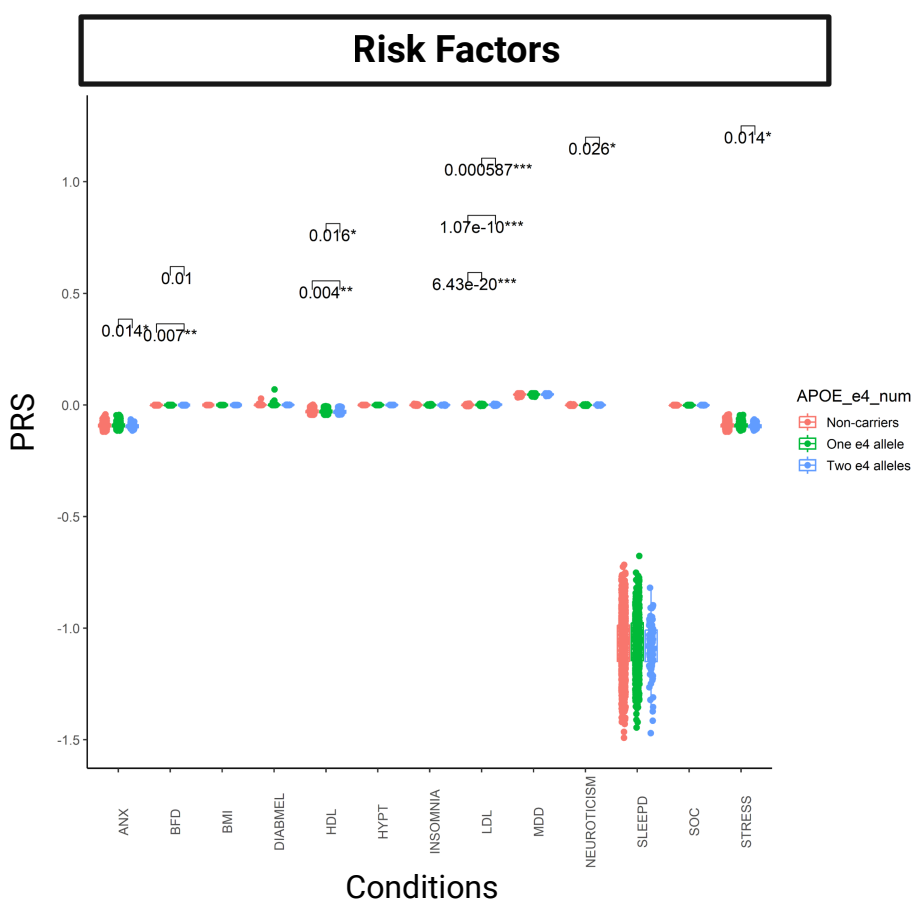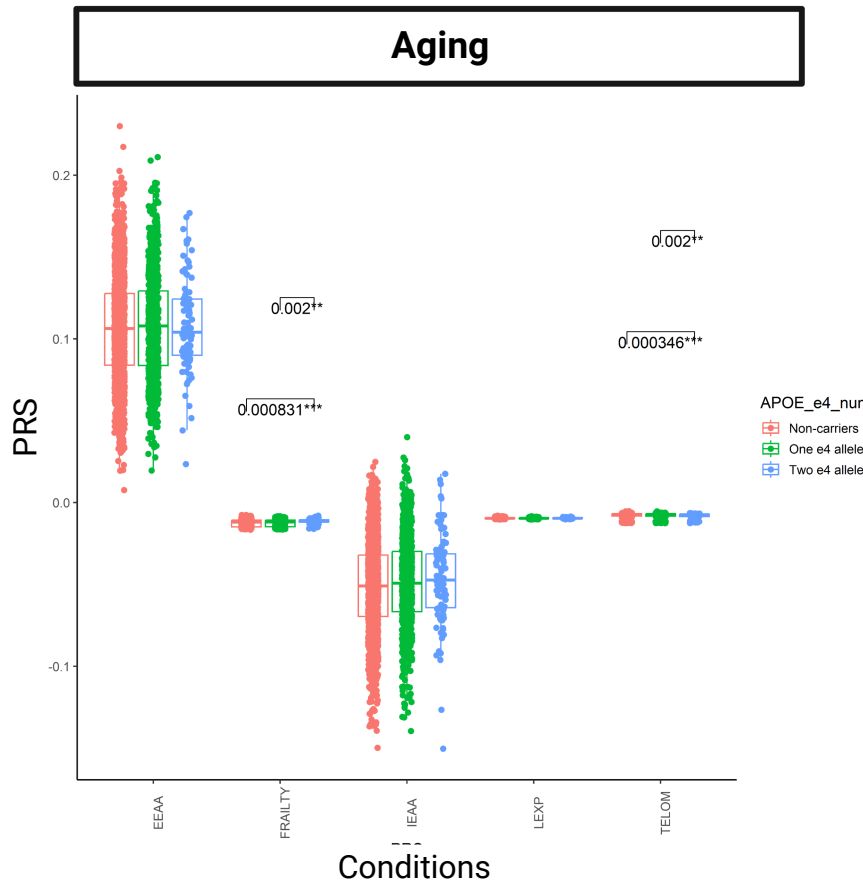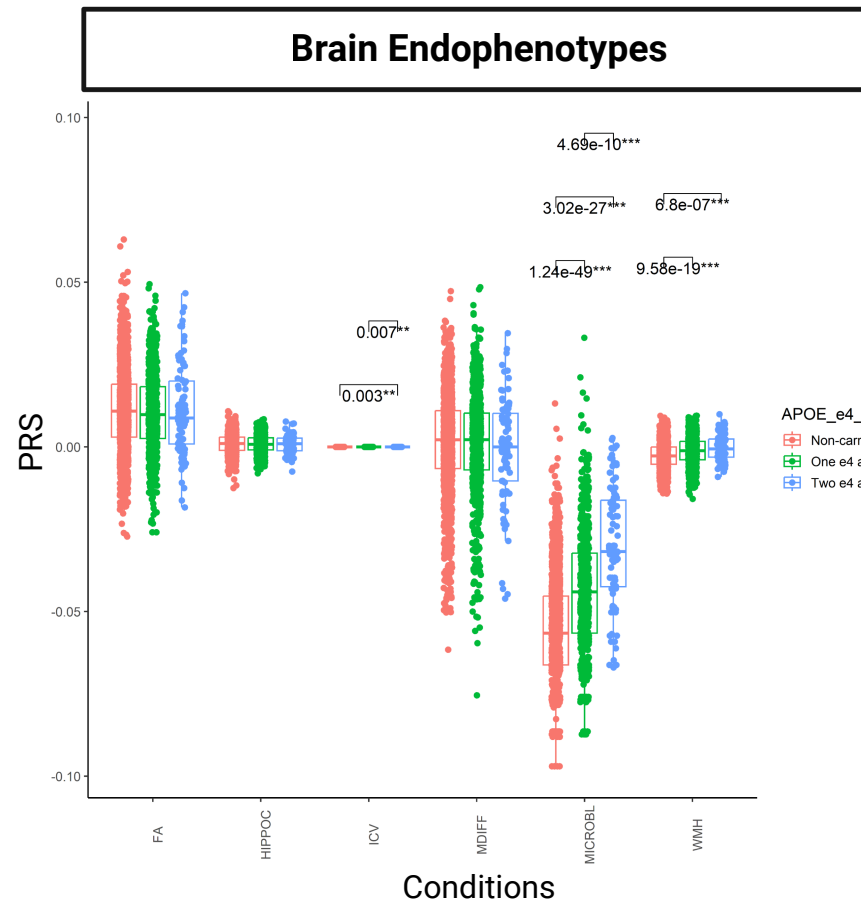

**Supplementary Figure S2.** Distribution of Polygenic Risk Scores by *APOE*-ε4 carriership. Adjusted FDR significant p-values are reported.
